# Supplementary material for: Integrative Analysis Identifies Multi-Omics Signatures That Drive Molecular Classification of Uveal Melanoma
Source: MDPI journal article supplement (doi:10.3390/cancers13246168), 2021-12-07
Supplement: s1 [file s1]

# Supplementary Materials: Integrative Analysis Identifies Multi-Omics Signatures That Drive Molecular Classification of Uveal Melanoma

Qianxing Mo, Lixin Wan, Michael J. Schell, Heather Jim, Shelley S. Tworoger and Guang Peng

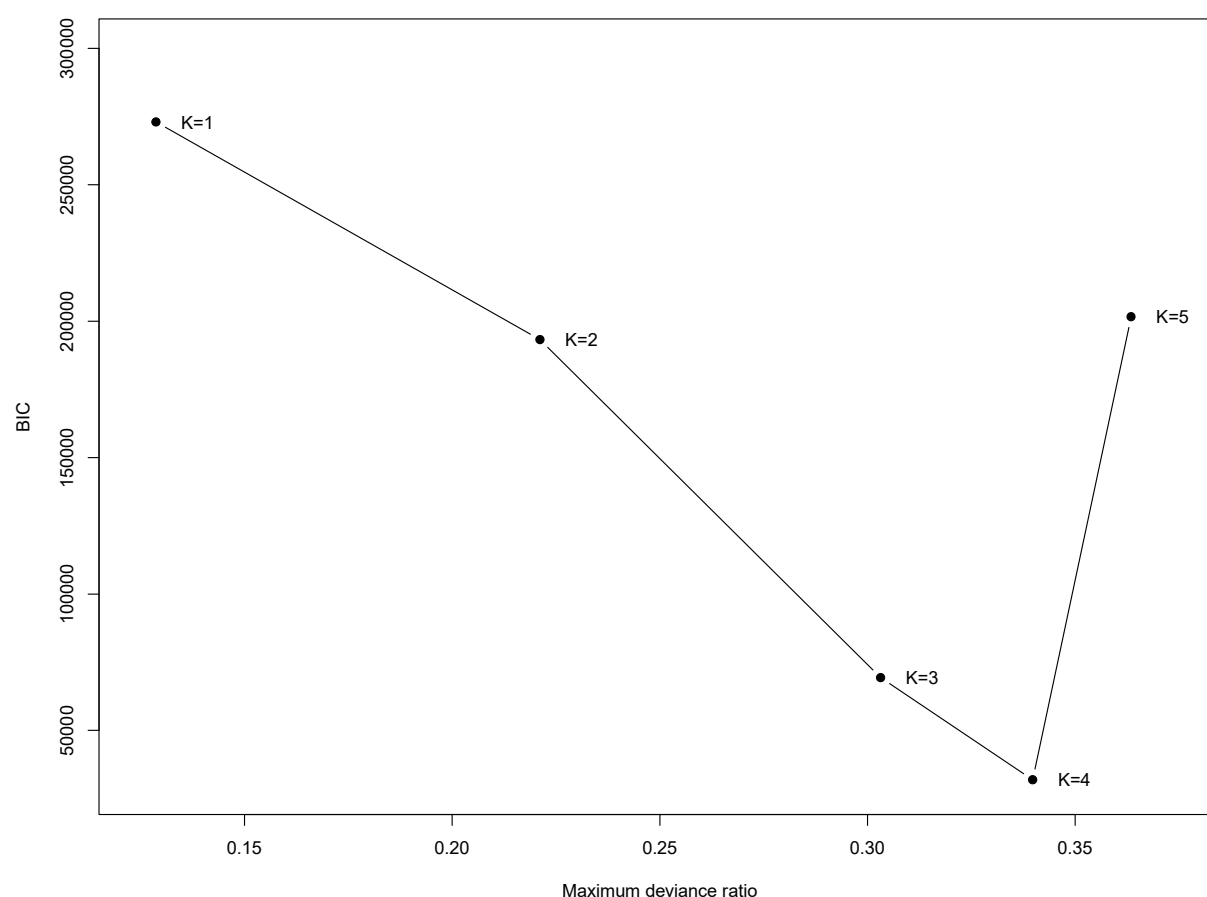

**Figure S1.** Model fitting parameters of iClusterPlus. Bayesian information criterion (BIC) and the maximum deviance ratio for the cluster parameter  $K=1,2,3,4,5$  are shown. For a given  $k$ , the samples can be divided into  $K+1$  clusters. Based on the BIC and maximum deviance ratio,  $K=3$  (4 clusters) and  $K=4$  (5 clusters) are two optimal solutions. .

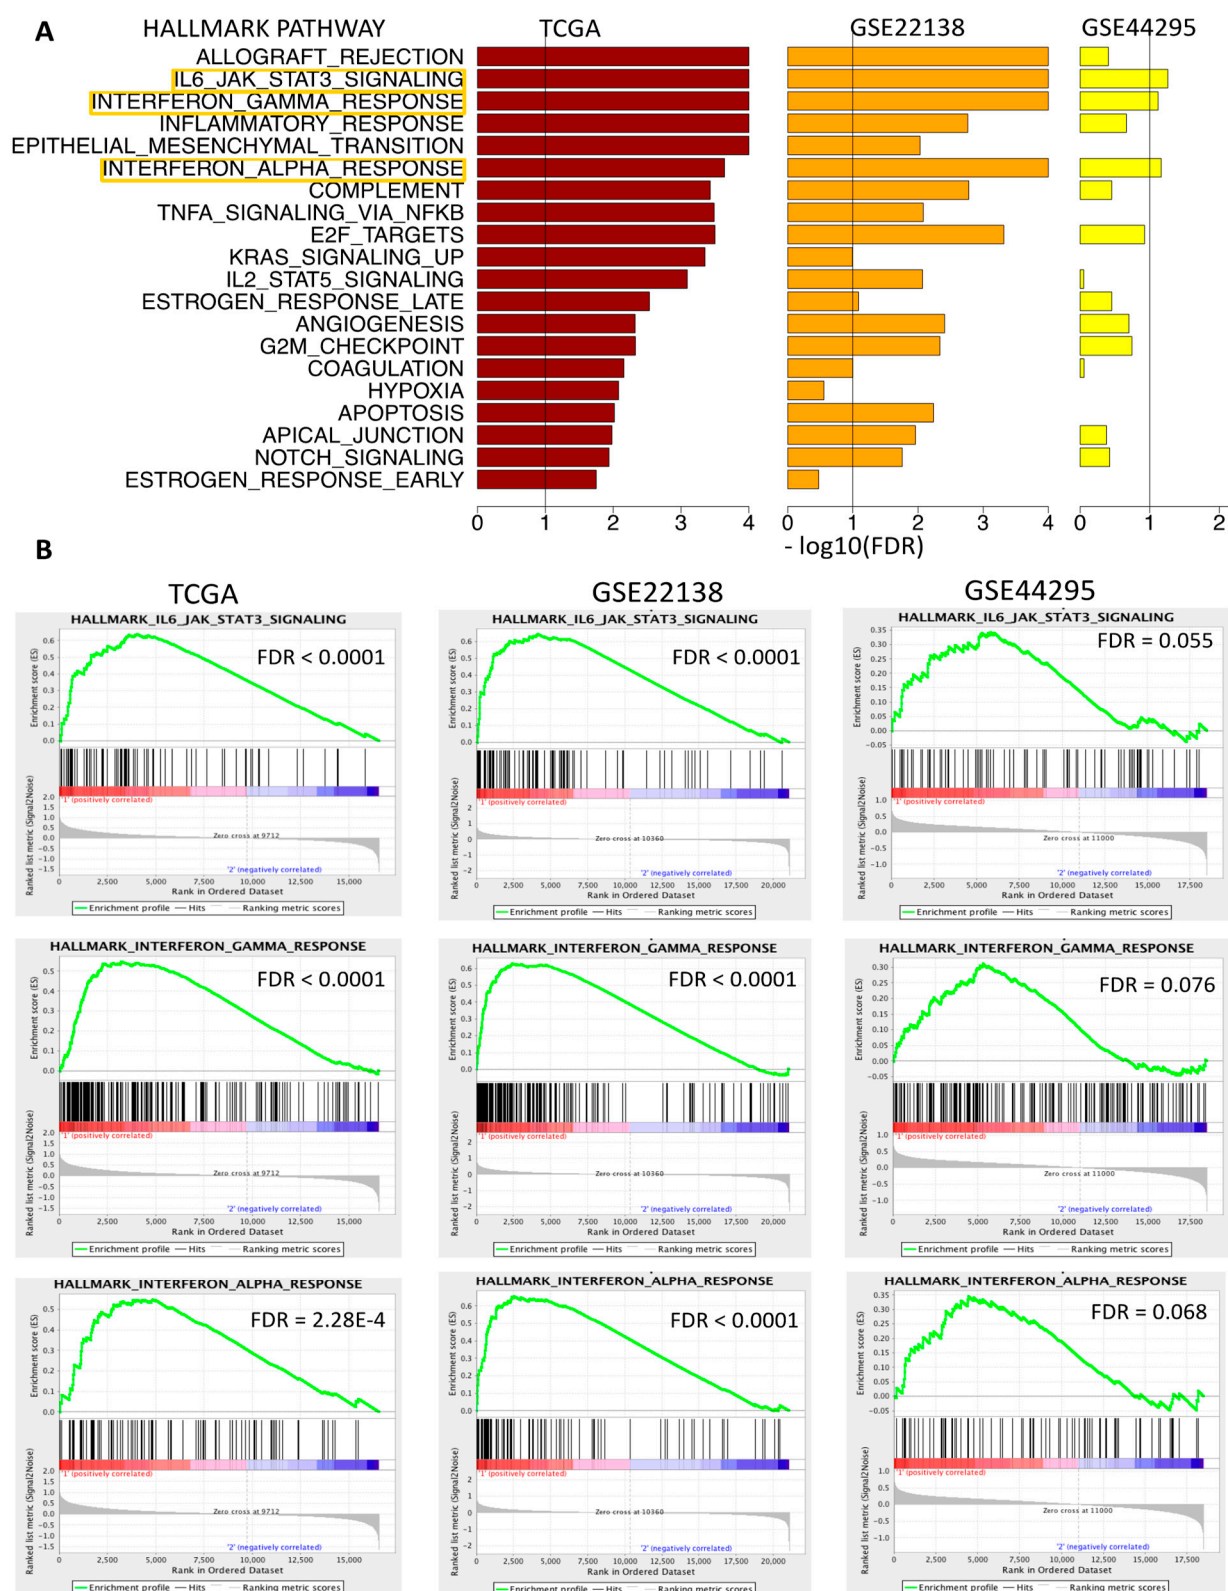

**Figure S2.** Top up-regulated pathways in the M3 subtype of the TCGA, GSE22138 and GSE44295 cohorts. **(A)** Comparison of the significance levels of the top up-regulated pathways. **(B)** Enrichment plots of the most significantly up-regulated pathways.

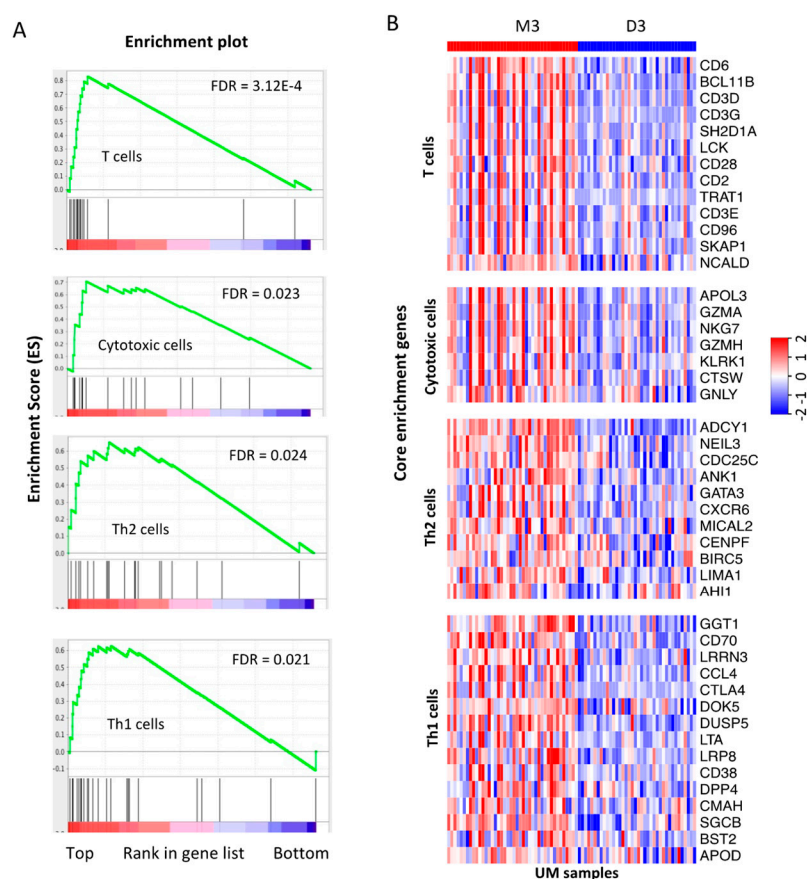

**Figure S3.** Up-regulated immune gene sets in the M3 iSubtype of the TCGA UM samples. **(A)** Enrichment plot of the enriched immune gene sets. Gene-based permutation test was used to calculate the FDR. **(B)** Heatmaps of the core enrichment genes of the up-regulated immune gene sets in the M3 iSubtype. On the heatmap, red and blue represent high and low expression, respectively.

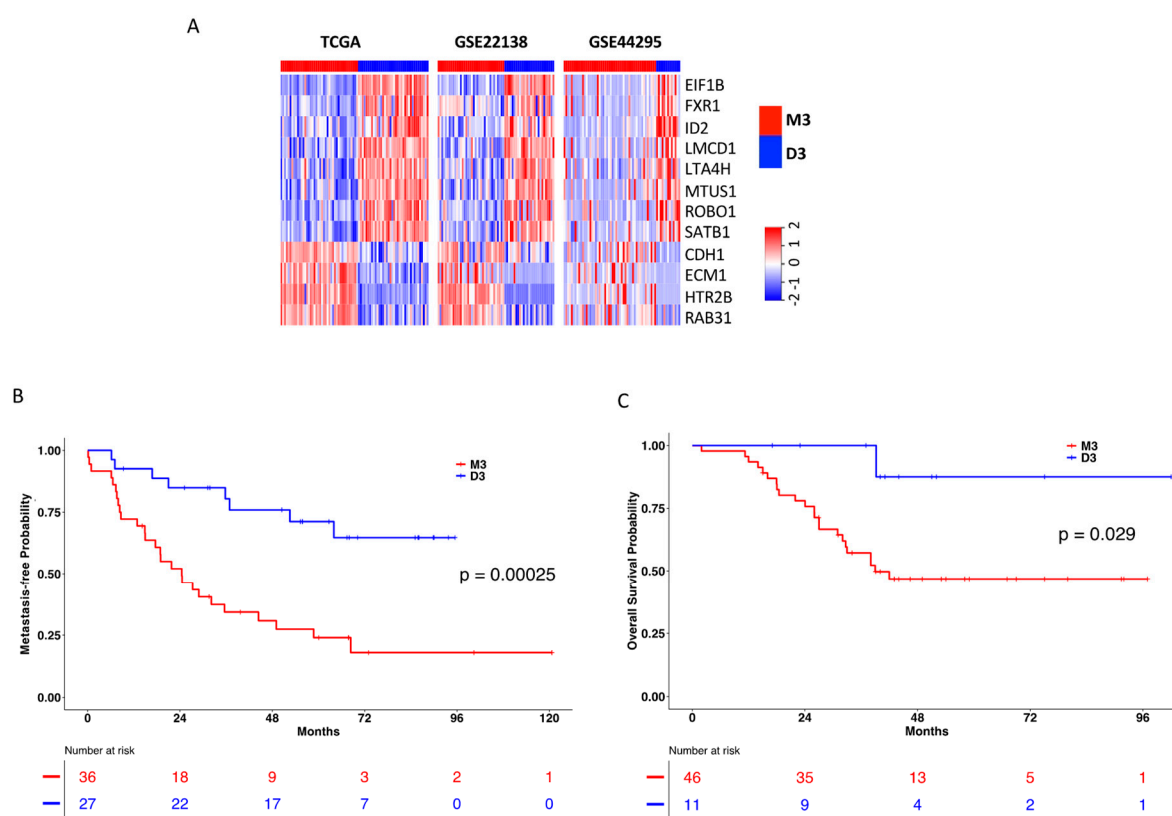

**Figure S4.** Prognostic power of the 12 gene expression signatures. **(A)** Heatmaps of the 12 gene expression of the training and testing data sets. **(B)** Patient metastasis-free survival stratified by the M3 and D3 subtypes defined by the 12 genes in the GSE22138 cohort. **(C)** Patient overall survival stratified by the M3 and D3 subtypes defined by the 12 genes in the GSE44295 cohort.

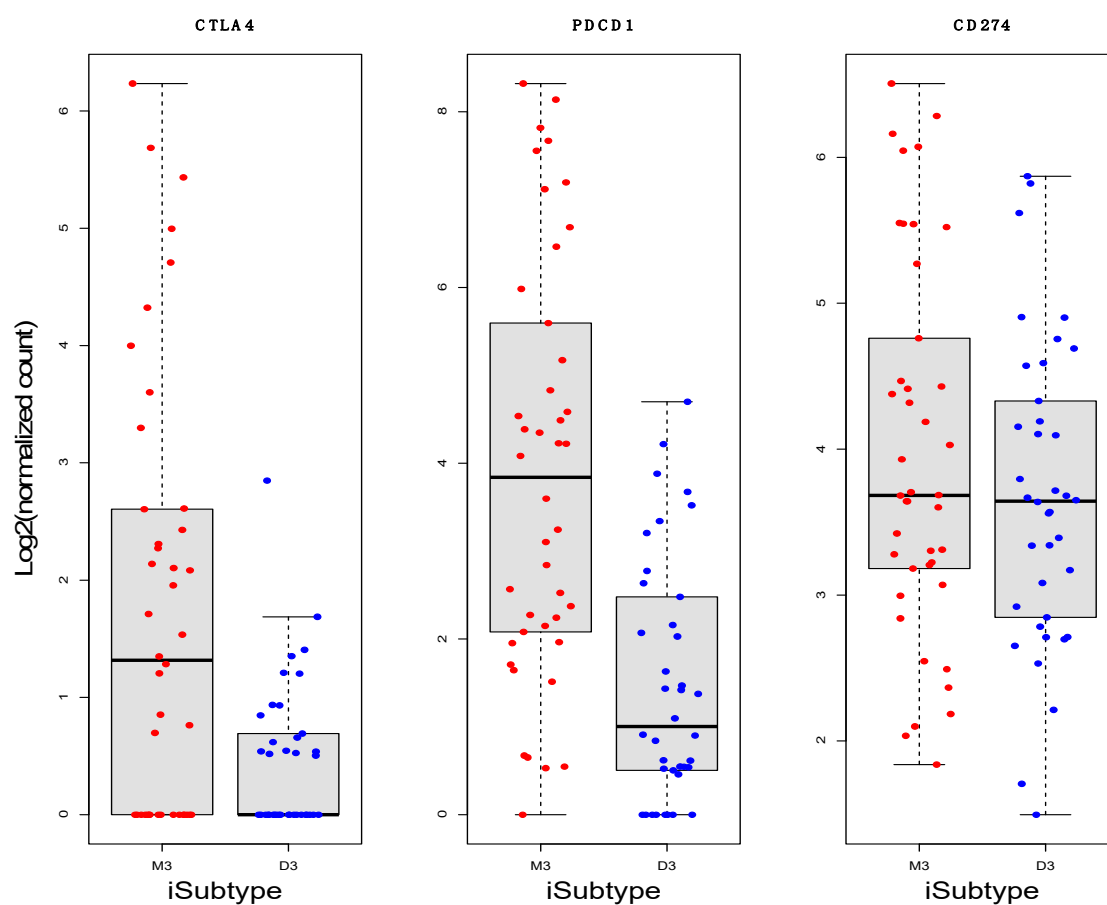

**Figure S5.** CTLA4, PDCD1 (PD1), and CD274(PDL1) expression in the M3 and D3 iSubtypes of the TCGA cohort.

**Table S1.** Comparison of 4-cluster solution (K = 3) and 5-cluster solution (K = 4).

| 4-cluster solution | 5-cluster solution |     |     |     |     |
|--------------------|--------------------|-----|-----|-----|-----|
|                    | M.1                | M.2 | D.1 | D.2 | D.3 |
| M.1                | 29                 | 0   | 0   | 0   | 0   |
| M.2                | 0                  | 13  | 0   | 0   | 0   |
| D.1                | 0                  | 0   | 9   | 1   | 0   |
| D.2                | 0                  | 0   | 0   | 23  | 5   |

The values in the table are the numbers of common samples shared by any pair of subtypes in the 4- and 5-cluster solutions.

**Table S2.** Top up-regulated BIOCARTA pathways in the M3 iSubtype of the TCGA cohort.

| BIOCARTA<br>Pathway Name | Description                                                                                       | SIZE | ES   | NES  | p-value | FDR    |
|--------------------------|---------------------------------------------------------------------------------------------------|------|------|------|---------|--------|
| CTLA4                    | The Co-Stimulatory Signal During T-cell Activation                                                | 19   | 0.79 | 2.01 | 0.0000  | 0.0021 |
| CSK                      | Activation of Csk by cAMP-dependent Protein Kinase Inhibits Signaling through the T Cell Receptor | 19   | 0.79 | 2.00 | 0.0000  | 0.0012 |
| SPPA                     | Aspirin Blocks Signaling Pathway Involved in Platelet Activation                                  | 15   | 0.75 | 1.81 | 0.0005  | 0.0313 |
| BAD                      | Regulation of BAD phosphorylation                                                                 | 23   | 0.67 | 1.76 | 0.0014  | 0.0490 |
| TCR                      | T Cell Receptor Signaling Pathway                                                                 | 44   | 0.57 | 1.75 | 0.0004  | 0.0494 |
| INTRINSIC                | Intrinsic Prothrombin Activation Pathway                                                          | 16   | 0.70 | 1.72 | 0.0041  | 0.0601 |
| EDG1                     | Phospholipids as signalling intermediaries                                                        | 22   | 0.65 | 1.71 | 0.0036  | 0.0538 |
| PAR1                     | Thrombin signaling and protease-activated receptors                                               | 18   | 0.68 | 1.71 | 0.0047  | 0.0517 |

|            |                                                                        |    |      |      |        |        |
|------------|------------------------------------------------------------------------|----|------|------|--------|--------|
| INFLAM     | Cytokines and Inflammatory Response                                    | 15 | 0.71 | 1.69 | 0.0038 | 0.0620 |
| TOB1       | Role of Tob in T-cell activation                                       | 16 | 0.68 | 1.66 | 0.0086 | 0.0798 |
| CHREBP     | ChREBP regulation by carbohydrates and cAMP                            | 16 | 0.66 | 1.61 | 0.0140 | 0.1261 |
| IL2RB      | IL-2 Receptor Beta Chain in T cell Activation                          | 37 | 0.54 | 1.59 | 0.0078 | 0.1381 |
| NKT        | Selective expression of chemokine receptors during T-cell polarization | 20 | 0.62 | 1.59 | 0.0192 | 0.1329 |
| IL12       | IL12 and Stat4 Dependent Signaling Pathway in Th1 Development          | 19 | 0.61 | 1.54 | 0.0244 | 0.1975 |
| NKCELLS    | Ras-Independent pathway in NK cell-mediated cytotoxicity               | 16 | 0.63 | 1.54 | 0.0288 | 0.1856 |
| MPR        | How Progesterone Initiates the Oocyte Maturation                       | 20 | 0.59 | 1.52 | 0.0318 | 0.2091 |
| NO2IL12    | NO2-dependent IL 12 Pathway in NK cells                                | 15 | 0.63 | 1.51 | 0.0360 | 0.2114 |
| CCR5       | Pertussis toxin-insensitive CCR5 Signaling in Macrophage               | 17 | 0.60 | 1.50 | 0.0366 | 0.2091 |
| EICOSANOID | Eicosanoid Metabolism                                                  | 22 | 0.57 | 1.50 | 0.0333 | 0.2000 |
| ATM        | ATM Signaling Pathway                                                  | 19 | 0.59 | 1.50 | 0.0361 | 0.1927 |

SIZE: number of genes in the pathway; ES: enrichment score of GSEA; NES: normalized enrichment score; p-value: raw p-value; FDR: adjusted p-value for multiple comparison.

**Table S3.** Classification results of the GSE22138 cohort using the expression signatures of the DEG368, DMEG, and the 12 classical genes. DEG368: differentially expressed genes on chr3, 6, 8 with FDR < 0.05 and absolute fold change of M3/D3 > 2; DMEG: 378 differentially methylated and expressed iSubtype-driving genes.

| Chr3 status      | Subtypes predicted by |    |      |    |              |    |
|------------------|-----------------------|----|------|----|--------------|----|
|                  | DEG368                |    | DMEG |    | The 12 genes |    |
|                  | M3                    | D3 | M3   | D3 | M3           | D3 |
| disomy           | 1                     | 17 | 2    | 16 | 1            | 17 |
| monosomy         | 30                    | 2  | 30   | 2  | 29           | 3  |
| NA               | 7                     | 1  | 7    | 1  | 6            | 2  |
| Partial monosomy | 1                     | 4  | 0    | 5  | 0            | 5  |
