# Supplementary material for: Integrative Analysis Identifies Multi-Omics Signatures That Drive Molecular Classification of Uveal Melanoma
Source: MDPI journal article supplement (doi:10.3390/cancers13246168), 2021-12-07
Supplement: s1 [file Supplementary_Table S4.xlsx]

## Sheet: UVM sample subtypes
Sample	iSubtype:1=M3.1, 2=M3.2, 3=D3.1, 4=D3.2
TCGA.RZ.AB0B.01	1
TCGA.V4.A9ED.01	1
TCGA.V4.A9EE.01	1
TCGA.V4.A9EF.01	1
TCGA.V4.A9EO.01	1
TCGA.V4.A9EQ.01	1
TCGA.V4.A9ES.01	1
TCGA.V4.A9EV.01	1
TCGA.V4.A9F1.01	1
TCGA.V4.A9F8.01	1
TCGA.VD.A8K8.01	1
TCGA.VD.A8KD.01	1
TCGA.VD.A8KF.01	1
TCGA.VD.A8KH.01	1
TCGA.VD.A8KK.01	1
TCGA.VD.A8KL.01	1
TCGA.VD.A8KM.01	1
TCGA.VD.A8KN.01	1
TCGA.VD.AA8O.01	1
TCGA.VD.AA8P.01	1
TCGA.VD.AA8T.01	1
TCGA.WC.A87Y.01	1
TCGA.WC.A882.01	1
TCGA.WC.A883.01	1
TCGA.WC.A888.01	1
TCGA.WC.AA9A.01	1
TCGA.YZ.A980.01	1
TCGA.YZ.A984.01	1
TCGA.YZ.A985.01	1
TCGA.V3.A9ZX.01	2
TCGA.V4.A9E7.01	2
TCGA.V4.A9E8.01	2
TCGA.V4.A9EI.01	2
TCGA.V4.A9EL.01	2
TCGA.V4.A9EU.01	2
TCGA.V4.A9EX.01	2
TCGA.V4.A9F0.01	2
TCGA.V4.A9F3.01	2
TCGA.V4.A9F5.01	2
TCGA.VD.A8KI.01	2
TCGA.VD.AA8N.01	2
TCGA.WC.A88A.01	2
TCGA.V4.A9E9.01	3
TCGA.V4.A9ET.01	3
TCGA.V4.A9EW.01	3
TCGA.V4.A9EZ.01	3
TCGA.V4.A9F4.01	3
TCGA.VD.A8K9.01	3
TCGA.VD.A8KB.01	3
TCGA.VD.A8KJ.01	3
TCGA.WC.A881.01	3
TCGA.WC.AA9E.01	3
TCGA.V3.A9ZY.01	4
TCGA.V4.A9E5.01	4
TCGA.V4.A9EA.01	4
TCGA.V4.A9EC.01	4
TCGA.V4.A9EH.01	4
TCGA.V4.A9EJ.01	4
TCGA.V4.A9EK.01	4
TCGA.V4.A9EM.01	4
TCGA.V4.A9EY.01	4
TCGA.V4.A9F2.01	4
TCGA.V4.A9F7.01	4
TCGA.VD.A8K7.01	4
TCGA.VD.A8KA.01	4
TCGA.VD.A8KE.01	4
TCGA.VD.A8KG.01	4
TCGA.VD.A8KO.01	4
TCGA.VD.AA8M.01	4
TCGA.VD.AA8Q.01	4
TCGA.VD.AA8R.01	4
TCGA.VD.AA8S.01	4
TCGA.WC.A87T.01	4
TCGA.WC.A87U.01	4
TCGA.WC.A87W.01	4
TCGA.WC.A880.01	4
TCGA.WC.A884.01	4
TCGA.WC.A885.01	4
TCGA.YZ.A982.01	4
TCGA.YZ.A983.01	4

## Sheet: Fig1B Methylation heatmap genes
Symbol	Clusters
PCDHA2	Me1
HCP5	Me1
PRO0611	Me1
CHD1L	Me1
TNFSF13B	Me1
CALCOCO2	Me1
CTSS	Me1
RRM2B	Me1
NAA25	Me1
OXTR	Me1
FAM43A	Me1
ASF1A	Me1
UNC93B1	Me1
TP53INP1	Me1
LYL1	Me1
KCTD12	Me1
EFCAB4B	Me1
ARHGAP10	Me1
ANO9	Me1
FEZ1	Me1
SPON2	Me1
FLRT2	Me1
NT5E	Me1
FAM134B	Me1
ZDHHC13	Me1
TRANK1	Me1
HTATIP2	Me1
DPP3	Me1
NOP58	Me1
ACTR3	Me1
FOS	Me1
PSMG3	Me1
DYNC1H1	Me1
RNF115	Me1
TRIB1	Me1
TNRC6A	Me1
GSTO1	Me1
NPAS2	Me1
HLX	Me1
TMEM131	Me1
TAGLN2	Me1
MGAT5	Me1
ZFP91	Me1
EFR3A	Me1
AKAP13	Me1
HTRA1	Me1
HECW2	Me1
HSD17B12	Me1
PKM2	Me1
ARHGAP18	Me1
ZNF365	Me1
NLRC5	Me1
BTN3A3	Me1
TAP1	Me1
PSMB8	Me1
XRN1	Me1
LOC400759	Me1
GBP1	Me1
XAF1	Me1
CASP1	Me1
APOL3	Me1
PTPRCAP	Me1
LAG3	Me1
DOK2	Me1
DLL4	Me1
CAMK1D	Me1
PCYT1A	Me1
EFHD2	Me1
UBE2Z	Me1
OGDH	Me1
DUSP5	Me1
TRIM65	Me1
PRDXDD1P	Me1
PLEK2	Me1
2021-09-03	Me1
C1orf38	Me1
SLC1A4	Me1
TM4SF19	Me1
KIAA0831	Me1
CTTN	Me1
ATP1B3	Me1
IL1B	Me1
SFRS7	Me1
RPL22L1	Me1
LHFPL2	Me1
CHAC1	Me1
BAG2	Me1
RNF144A	Me1
P4HA1	Me1
GREB1	Me1
CCRN4L	Me1
ZNF469	Me1
SLC22A18	Me1
CEP72	Me1
FSCN1	Me1
PPAPDC1B	Me1
GPX1	Me1
PVT1	Me1
CDC42SE1	Me1
ZNHIT1	Me1
TBC1D7	Me1
FNBP1	Me1
SLC7A8	Me1
APP	Me1
SRC	Me1
FAM107B	Me1
PLK3	Me1
UPP1	Me1
PFKP	Me1
NOL10	Me1
ARMC9	Me1
WDR70	Me1
LAMC1	Me1
NR2F2	Me1
CLCN3	Me1
PAFAH1B1	Me1
LRPAP1	Me1
ACOX3	Me1
ZIM2	Me1
SGCD	Me1
GK3P	Me1
FAM150A	Me1
SRGAP1	Me1
BAAT	Me1
ZBTB32	Me1
HIP1	Me1
STMN4	Me1
SLPI	Me1
SATB2	Me1
FSTL4	Me1
SMOC2	Me1
CDH13	Me1
PLCE1	Me1
PITPNC1	Me1
LOC606724	Me1
SPIRE1	Me1
GPM6A	Me1
FLJ33360	Me1
GPR107	Me1
LOC400940	Me1
LDB2	Me1
KIAA0802	Me1
GIMAP5	Me1
KDELR3	Me1
C21orf122	Me1
RNF149	Me1
MBOAT2	Me1
GAB1	Me1
BMF	Me1
VAPB	Me1
CPEB4	Me1
PIWIL4	Me1
LOC100128288	Me1
NF1	Me1
TAF1B	Me1
PDXK	Me1
SUSD5	Me1
HK3	Me1
FPR3	Me1
C22orf43	Me1
PCDHA8	Me1
PCDHA12	Me1
MYEOV	Me1
PANK2	Me1
CCR2	Me1
MAP2K4	Me1
C12orf76	Me1
WSB2	Me1
DDX5	Me1
SFRS3	Me1
MTMR10	Me1
GBP3	Me1
SGK1	Me1
C10orf28	Me1
ARID5B	Me1
PTCHD2	Me1
TEAD4	Me1
MBP	Me1
ANKRD30B	Me1
ETS2	Me1
ANGPT2	Me1
PTPRG	Me1
BIRC6	Me1
ATP6V1C2	Me1
UBAC2	Me1
ADAM9	Me1
DNAJC7	Me1
MELK	Me1
BCAT1	Me1
ADK	Me1
ZCCHC14	Me1
GPR56	Me1
TUBA8	Me1
AHNAK2	Me1
PPP3CC	Me1
GRIP1	Me1
FBXL19	Me1
CCDC77	Me1
HEATR2	Me1
POR	Me1
ELFN1	Me1
AMN	Me1
TCAP	Me1
BAIAP2L2	Me1
KCNK9	Me1
TMEM163	Me1
CLOCK	Me1
FABP3	Me1
UBE2N	Me1
PLCH1	Me1
RNF213	Me1
LARP4B	Me1
PTP4A3	Me1
LOC400931	Me1
CCDC109A	Me1
UBE2D3	Me1
GALNT7	Me1
LASS2	Me1
AUH	Me1
NT5DC3	Me1
VAV2	Me1
DNM3	Me1
THBS2	Me1
EPS8	Me1
CORO1C	Me1
MET	Me1
PLXNC1	Me1
NCRNA00152	Me1
LOC541471	Me1
AKAP10	Me1
PARP4	Me1
ISG20	Me1
SPATA13	Me1
ATP9A	Me1
TM9SF3	Me1
ITPRIPL2	Me1
STIM1	Me1
PLA2R1	Me1
KCNMB4	Me1
OR2C1	Me1
GALNT8	Me1
RRM2	Me1
FPR1	Me1
EVPL	Me1
LOC387646	Me1
FAM123C	Me1
C13orf16	Me1
CYP4V2	Me1
PRX	Me1
NKAPL	Me1
TH	Me1
TBCD	Me1
NPEPL1	Me1
CDIPT	Me1
C10orf84	Me1
KCNK3	Me1
C5orf42	Me1
PCDHGC4	Me1
GBP4	Me1
TMEM176A	Me1
SCHIP1	Me1
GIMAP8	Me1
C16orf91	Me1
MXRA8	Me1
SLC6A19	Me1
RAX2	Me1
EMR3	Me1
CTSW	Me1
LILRB2	Me1
RIMBP2	Me1
GZMH	Me1
CEACAM3	Me1
SIGLEC12	Me1
CD300LF	Me1
FLG2	Me1
NTRK3	Me1
NLRP3	Me1
APLNR	Me1
KRTAP5-9	Me1
BEND4	Me1
RBMXL2	Me1
CYP4F11	Me1
TUBB8	Me1
LOC649330	Me1
TCHH	Me1
LOC400696	Me1
CLEC17A	Me1
SCN11A	Me1
SLC15A2	Me1
PSG4	Me1
HERC2P4	Me1
NLRP14	Me1
CD163L1	Me1
OR2C3	Me1
CD53	Me1
MGC16025	Me1
FRS2	Me1
KEL	Me1
TOX2	Me1
CD33	Me1
ZNF572	Me1
GREB1L	Me1
ZNF695	Me1
FSD1	Me1
FLJ30679	Me1
LMTK3	Me1
PRAME	Me1
HMGA1	Me1
DHDH	Me1
KDELR2	Me1
INF2	Me1
FAM108A1	Me1
ANKRD37	Me1
SBNO2	Me1
ACY1	Me1
DEGS1	Me1
ZNF503	Me1
ARL4D	Me1
KIAA1908	Me1
CPNE4	Me1
SERPINF1	Me1
GIMAP2	Me1
C14orf73	Me1
WFDC1	Me1
STRADB	Me1
SLC30A1	Me1
TM2D3	Me1
SEPHS2	Me1
SOX1	Me1
UQCRFS1	Me1
ATP5A1	Me1
SRD5A3	Me1
CKS2	Me1
CHGA	Me1
GRIA1	Me1
C5orf43	Me1
ST8SIA3	Me1
TYRP1	Me1
PRSS23	Me1
TMEM26	Me1
NCALD	Me1
BHLHE41	Me1
TNS1	Me1
CUBN	Me1
C22orf9	Me1
SLC25A13	Me1
AZI1	Me1
ZNF714	Me1
GPR146	Me1
PRSS50	Me1
CNTD2	Me1
CENPB	Me1
C19orf51	Me1
SLC45A2	Me1
DGKD	Me1
LINGO4	Me1
FAM19A4	Me1
NLRP7	Me1
ZNF474	Me1
RASAL3	Me1
RASSF9	Me1
SLC6A13	Me1
CLSTN2	Me1
BMP3	Me1
RASSF10	Me1
SDR42E1	Me1
OR2L13	Me1
KLK6	Me1
CA3	Me1
ZNF648	Me1
ZIC4	Me1
HSD17B14	Me1
SOX2OT	Me1
PTGER4	Me1
PCDHGA4	Me1
CLEC4G	Me1
ZNF727	Me1
PCDHGA12	Me1
PPP1R1C	Me1
C21orf91	Me1
TIAM1	Me1
FAM26E	Me1
MUC7	Me1
FMN1	Me1
AMZ1	Me1
EPDR1	Me1
CDH6	Me1
GCH1	Me1
SPATA18	Me1
CLEC14A	Me1
TNFRSF4	Me1
FAM150B	Me1
CNTN2	Me1
PLAUR	Me1
C17orf96	Me1
GLP1R	Me1
ST8SIA4	Me1
KDR	Me1
DACT1	Me1
SLC16A6	Me1
ADAM12	Me1
SYT9	Me1
IL7R	Me1
HIST1H4I	Me1
DAPK1	Me1
CDKL2	Me1
C2orf39	Me1
MAPRE2	Me1
KHDRBS3	Me1
PLCB4	Me1
GRB10	Me1
TNFRSF11A	Me1
GNG4	Me1
SYK	Me1
C10orf108	Me1
FAM20C	Me1
SLFN12L	Me1
PHF2	Me1
SARM1	Me1
ADNP2	Me1
IRX1	Me1
CACNB4	Me1
PLCL2	Me1
DOCK10	Me1
RBMS1	Me1
NECAB2	Me1
KCNH1	Me1
CHST9	Me1
ABTB2	Me1
FMNL1	Me1
RASGRF1	Me1
EPAS1	Me1
SALL1	Me1
ALCAM	Me1
ZEB2	Me1
ITGB1BP1	Me1
IFI44L	Me1
FJX1	Me1
ADM	Me1
YWHAH	Me1
C21orf63	Me1
TRA2A	Me1
SLC16A8	Me1
F7	Me1
KNDC1	Me1
ZNF296	Me1
WNK2	Me1
MAP3K8	Me1
TRIM59	Me1
ME1	Me1
CABYR	Me1
NCRNA00092	Me1
C2CD4B	Me1
FBXO27	Me1
EGR1	Me1
PTPRR	Me1
HMGB2	Me1
CDH2	Me1
RORB	Me1
CIT	Me1
ADARB2	Me1
PCDHA9	Me1
COL14A1	Me1
F5	Me1
DACT2	Me1
BASP1	Me1
MAB21L1	Me1
PRTG	Me1
LOC285780	Me1
STEAP4	Me1
STBD1	Me1
SLC12A8	Me1
WARS	Me1
GPRC5A	Me1
ACSL1	Me1
TNFRSF19	Me1
STARD13	Me1
CAPN2	Me1
PGCP	Me1
MGC45800	Me1
MSX2P1	Me1
RD3	Me1
NXPH2	Me1
UCHL1	Me1
KCNK1	Me1
SEMA6C	Me1
GATSL2	Me1
SLC46A3	Me1
SGEF	Me1
ORAI3	Me1
CDH7	Me1
TSPAN13	Me1
FERMT1	Me1
YPEL4	Me1
EYA2	Me1
ADAMTS8	Me1
CCDC81	Me1
C1orf70	Me1
MYOD1	Me1
C2CD4A	Me1
FBXL21	Me1
SGIP1	Me1
PLEKHG5	Me1
KCNJ8	Me1
DPP4	Me1
CCDC152	Me1
FAM162B	Me1
ACHE	Me1
COBL	Me1
ENPP4	Me1
LRBA	Me1
B3GNT8	Me1
NR1I2	Me1
GPR176	Me1
DLEC1	Me1
TMEM176B	Me1
F13A1	Me1
NEURL1B	Me1
KCNC1	Me1
GSTM5	Me1
PDE2A	Me1
C15orf27	Me1
MYO1D	Me1
BCL2L1	Me1
PCDHGB6	Me1
TMTC1	Me1
BARX1	Me1
KIAA1244	Me1
IFI16	Me1
PCNXL2	Me1
ITGA3	Me1
SERP2	Me1
GDF7	Me1
HCK	Me1
CITED2	Me1
PPM1K	Me1
ANO5	Me1
TMEM147	Me1
TFAP2C	Me1
LOC441204	Me1
CRB1	Me1
FAM132A	Me1
PYGM	Me1
NEXN	Me1
KLHL30	Me1
LEAP2	Me1
GUCY2C	Me1
SPOCD1	Me1
LUM	Me1
EPB41L3	Me1
MGAT4A	Me1
IQCE	Me1
PRKCDBP	Me1
RAPGEFL1	Me1
AK3L1	Me1
RNF216	Me1
LOC284009	Me1
SGSM2	Me1
DYNLL1	Me1
TRPV4	Me1
ZMIZ1	Me1
2021-09-09	Me1
ZSWIM7	Me1
MEF2D	Me1
SNX1	Me1
FKBP1A	Me1
ALG5	Me1
ANXA2	Me1
CXXC5	Me1
CXCR7	Me1
LOC653653	Me1
FAM131B	Me1
EMX2OS	Me1
LRRC32	Me1
C19orf35	Me1
SMARCD3	Me1
GAS2L2	Me1
SLFN11	Me1
RGS4	Me1
RASAL2	Me1
KLF5	Me1
KRT222	Me1
ZAK	Me1
SEMA6D	Me1
ROBO2	Me1
TBCK	Me1
FAM166B	Me1
FOXK1	Me1
KCTD4	Me1
OMG	Me1
MMP25	Me1
TNKS1BP1	Me1
SULT1A1	Me1
PLA2G10	Me1
KLK15	Me1
CEACAM6	Me1
KLK14	Me1
KIT	Me1
ZC3H7A	Me1
RHOQ	Me1
STK39	Me1
HDAC4	Me1
APLP2	Me1
STK32A	Me1
TTYH3	Me1
NFIC	Me1
STX19	Me1
PIP4K2A	Me1
CALHM2	Me1
PDCD6	Me1
RUFY3	Me1
RHOB	Me1
CLYBL	Me1
TMCO7	Me1
C10orf26	Me1
ZNF609	Me1
TMEM136	Me1
ST6GALNAC5	Me1
SH3PXD2B	Me1
NDUFA4L2	Me1
LSM12	Me1
PRKD1	Me1
FAM163A	Me1
TMEM184B	Me1
BTBD11	Me1
ARG2	Me1
FERMT3	Me1
UNC5A	Me1
TMEM200B	Me1
C17orf28	Me1
GJA1	Me1
EMID2	Me1
PLEKHB1	Me1
MAN1C1	Me1
PAM	Me1
IFNAR2	Me1
MXRA7	Me1
C2	Me1
TSC22D1	Me1
PEA15	Me1
CPLX1	Me1
LINGO1	Me1
PVRL1	Me1
GPR124	Me1
PGBD5	Me1
FAM124A	Me1
MMP11	Me1
VPS53	Me1
CNNM2	Me1
PHLDB1	Me1
ABCG2	Me1
MYOZ3	Me1
CYGB	Me1
DOK7	Me1
E2F2	Me1
C6orf150	Me1
CADM1	Me1
BMPR1B	Me1
TNRC18	Me1
E2F8	Me1
GAL3ST4	Me1
WNK1	Me1
HK1	Me1
SOX8	Me1
PHLDA2	Me1
TRIM47	Me1
DNM2	Me1
RSAD2	Me1
PAK7	Me1
EGFLAM	Me1
CEND1	Me1
CHST12	Me1
ARRB1	Me1
LIMD1	Me1
CNTF	Me1
ATP6V0A4	Me1
PCDHGC3	Me1
MAPK10	Me1
CHSY3	Me1
MRPL14	Me1
ARAP1	Me1
PRKCA	Me1
COG5	Me1
WWTR1	Me1
GLI2	Me1
RCOR2	Me1
KLHL14	Me1
TAC4	Me1
PDE1C	Me1
FGFR1	Me1
TPCN2	Me2
KLHL21	Me2
RAPGEF3	Me2
LRCH4	Me2
SKI	Me2
TUBB4	Me2
EIF4EBP2	Me2
BDH1	Me2
ZNF747	Me2
CD320	Me2
QTRT1	Me2
MOCS1	Me2
FRK	Me2
ENGASE	Me2
MIDN	Me2
CIRBP	Me2
C19orf22	Me2
ZNF606	Me2
AMBP	Me2
RPSAP58	Me2
TOMM20L	Me2
PARP6	Me2
MXI1	Me2
IRF2BP2	Me2
ZFP28	Me2
LYPD3	Me2
LGI4	Me2
FZD6	Me2
DUSP23	Me2
CYB5R2	Me2
C4orf38	Me2
APH1B	Me2
CRTAC1	Me2
COX6A2	Me2
NMT2	Me2
ZSWIM4	Me2
FBXL15	Me2
NAT14	Me2
VAC14	Me2
OBSCN	Me2
C20orf195	Me2
ZFAND2B	Me2
IRS1	Me2
PLA2G5	Me2
AEBP1	Me2
PDGFC	Me2
KIF7	Me2
PIGX	Me2
PDK4	Me2
CAT	Me2
FAM181B	Me2
RABL5	Me2
GPR62	Me2
TNFSF12	Me2
RBM43	Me2
UTS2D	Me2
SERPING1	Me2
GAMT	Me2
NSUN7	Me2
STAR	Me2
CCL28	Me2
PRICKLE2	Me2
ADPRH	Me2
SPRY1	Me2
PCDH20	Me2
IGSF22	Me2
MMACHC	Me2
TJP2	Me2
LRRN1	Me2
MOSC2	Me2
AK3	Me2
ELL2	Me2
ATAD3C	Me2
MAP3K9	Me2
EZH1	Me2
KIAA1217	Me2
DNM1	Me2
TESK2	Me2
ASRGL1	Me2
HIF1AN	Me2
C14orf93	Me2
PACS1	Me2
POLM	Me2
PDGFRL	Me2
EMCN	Me2
WWOX	Me2
FGD4	Me2
TMEM71	Me2
FYN	Me2
GABRP	Me2
SPINT1	Me2
SNCA	Me2
INCA1	Me2
DUSP4	Me2
C6orf176	Me2
TMEM140	Me2
COMMD3	Me2
IPMK	Me2
LPAR2	Me2
F11R	Me2
JAZF1	Me2
ROPN1B	Me2
RCAN3	Me2
PYCARD	Me2
FXYD5	Me2
CPXM2	Me2
STMN1	Me2
NOB1	Me2
PMM1	Me2
CAV2	Me2
TLR4	Me2
RSU1	Me2
RAB11FIP1	Me2
NHEJ1	Me2
CAMK4	Me2
ZNF789	Me2
ANXA9	Me2
ACSF2	Me2
WIPF3	Me2
LOC100302640	Me2
PANK1	Me2
FAM125B	Me2
ABCG1	Me2
2021-09-04	Me2
TMIGD2	Me2
FBP2	Me2
RHOBTB2	Me2
TOMM22	Me2
ARL4A	Me2
ADRBK1	Me2
EFEMP2	Me2
AMAC1L3	Me2
ITGB7	Me2
SH3GLB2	Me2
FSTL1	Me2
NCOA7	Me2
LOC401093	Me2
REPS1	Me2
WRNIP1	Me2
PRRT1	Me2
RPL8	Me2
C15orf41	Me2
ACOT11	Me2
LOC151174	Me2
LOC100271722	Me2
EMILIN1	Me2
SAMD10	Me2
DTWD1	Me2
FBXO17	Me2
LSM5	Me2
FCGRT	Me2
EFS	Me2
IKZF4	Me2
GALNT4	Me2
CTF1	Me2
ZNF433	Me2
ESD	Me2
SLC25A38	Me2
CCND3	Me2
CAPN7	Me2
HNMT	Me2
C1orf190	Me2
SERPINB6	Me2
SATB1	Me2
CCDC34	Me2
MKRN2	Me2
BTRC	Me2
KDM5B	Me2
C22orf32	Me2
RUNDC2A	Me2
GLRX5	Me2
CRAMP1L	Me2
ZHX1	Me2
BRP44	Me2
LOC100286844	Me2
ERN1	Me2
CNIH	Me2
SLC6A15	Me2
MRPL43	Me2
LOH12CR2	Me2
FKBP14	Me2
NOD1	Me2
LOC400927	Me2
C17orf75	Me2
ATR	Me2
MANSC1	Me2
DIXDC1	Me2
GALC	Me2
RAB20	Me2
TMEM159	Me2
RCL1	Me2
CUL9	Me2
GAS2L3	Me2
ACAA2	Me2
RPL34	Me2
KIF6	Me2
AHCYL2	Me2
ZHX2	Me2
TNPO2	Me2
SETD3	Me2
PDCD6IP	Me2
C15orf61	Me2
TMEM97	Me2
C16orf86	Me2
LIPE	Me2
STXBP5	Me2
FRRS1	Me2
ZNF334	Me2
TSC22D4	Me2
SEMA4C	Me2
TTLL11	Me2
CCDC52	Me2
RMND5A	Me2
SPRY2	Me2
FANCG	Me2
CYP7B1	Me2
TMCO3	Me2
EXTL3	Me2
ZNF48	Me2
SLC7A2	Me2
C7orf41	Me2
ZNF608	Me2
GNG11	Me2
B3GNT1	Me2
TEX9	Me2
ENPP2	Me2
SPEF2	Me2
BTG1	Me2
LRRFIP2	Me2
FLYWCH1	Me2
SHC4	Me2
PDK2	Me2
C9orf98	Me2
SPAG16	Me2
LRRC34	Me2
ESPNL	Me2
ZSCAN1	Me2
SEMA6A	Me2
C20orf112	Me2
CNRIP1	Me2
PHC1	Me2
UNK	Me2
MGC23270	Me2
SOX15	Me2
TBKBP1	Me2
GPR37	Me2
STX1A	Me2
KCTD15	Me2
KCNQ5	Me2
ID4	Me2
KLF12	Me2
ESRRG	Me2
AKR1B1	Me2
NDRG2	Me2
CASC1	Me2
POLD2	Me2
PODXL2	Me2
NFIB	Me2
HPGD	Me2
ROBO1	Me2
DGKE	Me2
TMPRSS5	Me2
C7orf51	Me2
PALMD	Me2
LOC26102	Me2
GALM	Me2
GPR150	Me2
C14orf1	Me2
ASPA	Me2
C6orf186	Me2
TRIB2	Me2
SEC14L1	Me2
BOC	Me2
BFSP2	Me2
ARRDC3	Me2
CSRP2	Me2
COPG2	Me2
MYH10	Me2
COL1A2	Me2
SIK1	Me2
ADRB2	Me2
MOSPD3	Me2
ECHDC3	Me2
LOC285696	Me2
NCKAP5	Me2
GPX3	Me2
TRIP10	Me2
CCDC8	Me2
MSRB2	Me2
SLC2A9	Me2
ETS1	Me2
MTCH1	Me2
HIPK2	Me2
LOC100134259	Me2
FBXO40	Me2
FAM69A	Me2
ONECUT1	Me2
DCAF4	Me2
LPAR6	Me2
ZBTB42	Me2
C9orf78	Me2
C9orf25	Me2
MEIS1	Me2
TGFB1I1	Me2
SSPN	Me2
TSKU	Me2
TMEM8B	Me2
IFIT2	Me2
BTN3A2	Me2
KIAA1377	Me2
PELI2	Me2
CD274	Me2
TUFT1	Me2
TEKT3	Me2
KCNS3	Me2
UBE2L6	Me2
TRIM14	Me2
UBA7	Me2
ACSS1	Me2
NEIL1	Me2
ETNK2	Me2
NT5C3L	Me2
LRP4	Me2
PAK1	Me2
MYCBPAP	Me2
ELOVL3	Me2
YPEL3	Me2
KREMEN1	Me2
AES	Me2
TLR5	Me2
FXYD3	Me2
SPP1	Me2
MEGF10	Me2
FAP	Me2
C5orf30	Me2
TMEM25	Me2
BEND5	Me2
RFNG	Me2
FLYWCH2	Me2
MLLT11	Me2
DAZAP1	Me2
CDK20	Me2
UBE2O	Me2
C3orf39	Me2
ABCA1	Me2
ZNF219	Me2
DDAH2	Me2
NRP2	Me2
UNC45A	Me2
GLB1L	Me2
YJEFN3	Me2
TBX2	Me2
HMCN1	Me2
ABCA8	Me2
FLJ34503	Me2
ALDH1A3	Me2
PDGFRA	Me2
GLIS1	Me2
CCDC80	Me2
C19orf44	Me2
ZADH2	Me2
LIN7A	Me2
PPARG	Me2
MPP7	Me2
SSBP2	Me2
HOXA13	Me2
CBLB	Me2
GLB1L2	Me2
MAPRE3	Me2
LRRK2	Me2
C1orf51	Me2
ME3	Me2
SCD	Me2
NEDD4L	Me2
PTP4A1	Me2
TRIM2	Me2
RGS3	Me2
BTBD3	Me2
C9orf95	Me2
BOD1	Me2
HBP1	Me2
EFNA1	Me2
C10orf10	Me2
ZSCAN12	Me2
MARVELD2	Me2
MRPL48	Me2
ALDH7A1	Me2
POLR3G	Me2
ABLIM1	Me2
UNC5CL	Me2
TEC	Me2
LPP	Me2
ZNF217	Me2
FOXP1	Me2
LOC144486	Me2
TSPAN14	Me2
ATP11B	Me2
DFNB31	Me2
NET1	Me2
MAP2K5	Me2
ENTPD6	Me2
HOOK1	Me2
GRAMD3	Me2
ARAP2	Me2
C4orf19	Me2
MCOLN3	Me2
CTSL1	Me2
MAML2	Me2
SLC7A5	Me2
MAP3K5	Me2
HSPA2	Me2
ZNF771	Me2
NOMO2	Me2
WDSUB1	Me2
ST7OT1	Me2
RBP7	Me2
SLC44A3	Me2
SIRPA	Me2
RNF43	Me2
FAM169A	Me2
VMAC	Me2
TCF7L2	Me2
RBM20	Me2
RHOD	Me2
BMI1	Me2
ITPRIP	Me2
DUSP16	Me2
SEMA4G	Me2
CNKSR3	Me2
TMEM40	Me2
QARS	Me2
PLA1A	Me2
EIF3K	Me2
BRD3	Me2
BATF2	Me2
TPD52L2	Me2
SERPINB9	Me2
SRGN	Me2
COBRA1	Me2
PRKCH	Me2
TMPRSS3	Me2
KCTD9	Me2
RORC	Me2
MPPED2	Me2
KRT23	Me2
GOLGA7	Me2
C6orf168	Me2
SERTAD2	Me2
DAAM2	Me2
CEACAM1	Me2
TXNIP	Me2
TMEM84	Me2
SCGB1D2	Me2
PACSIN2	Me2
SILV	Me2
RNPEP	Me2
C13orf35	Me2
ATP11A	Me2
FUT3	Me2
LOC93622	Me2
FAM60A	Me2
COMMD6	Me2
RIPK4	Me2
RHPN1	Me2
RPS5	Me2
ITPKC	Me2
VAMP8	Me2
PPAPDC2	Me2
B4GALT3	Me2
CCDC11	Me2
OAZ1	Me2
GNA11	Me2
ZNF500	Me2
CMTM7	Me2
BFAR	Me2
PTPMT1	Me2
MCM2	Me2
OLA1	Me2
RGP1	Me2
OXNAD1	Me2
PDE12	Me2
HSPA1B	Me2
PLEKHG4	Me2
FAM53C	Me2
PARP3	Me2
NFKBID	Me2
CTSF	Me2
ARHGEF5	Me2
NR2C2AP	Me2
C19orf25	Me2
CSNK1D	Me2
ZBTB3	Me2
NIT2	Me2
MARS2	Me2
LRRC33	Me2
RPN1	Me2
PRDX2	Me2
POU6F1	Me2
CTSD	Me2
ZNF598	Me2
FANCE	Me2
IFT122	Me2
RTN3	Me2
PFKFB2	Me2
C10orf58	Me2
ARHGAP21	Me2
CREB3L4	Me2
HNRPDL	Me2
DRAP1	Me2
C15orf52	Me2
HSPBAP1	Me2
FYTTD1	Me2
INPP1	Me2
ZNF785	Me2
LOC100289341	Me2
FAM118A	Me2
SCARB2	Me2
SGOL1	Me2
DIRC2	Me2
ZNF740	Me2
KRBA1	Me2
C7orf31	Me2
NIPSNAP1	Me2
ALDH18A1	Me2
C4orf3	Me2
ZNF687	Me2
DVL3	Me2
ZNF749	Me2
2021-09-08	Me2
MYOM1	Me2
TMEM101	Me2
IL24	Me2
CRTAP	Me2
ETV5	Me2
DAG1	Me2
MTMR14	Me2
SAMM50	Me2
PXT1	Me2
PARVA	Me2
RASIP1	Me2
PPP2R3A	Me2
SPR	Me2
H2AFY2	Me2
GXYLT2	Me2
CAMP	Me2
ZCCHC3	Me2
C14orf37	Me2
PLEKHG3	Me2
LTBP1	Me2
SNRPA	Me2
NWD1	Me2
ANKRD23	Me2
SH3BP4	Me2
LPIN1	Me2
GPD1L	Me2
POMGNT1	Me2
DDA1	Me2
SERP1	Me2
LSM6	Me2
WWP2	Me2
IGHMBP2	Me2
SLC7A4	Me2
BCAS4	Me2
LOC154822	Me2
HRASLS	Me2
TFAP2A	Me2
ENTPD7	Me2
TFF3	Me2
CSRNP3	Me2
GHRL	Me2
UACA	Me2
PLEKHA4	Me2
TOM1	Me2
ADSSL1	Me2
BECN1	Me2
C3orf17	Me2
ABCC5	Me2
CDK2	Me2
C8orf12	Me2
OSBPL10	Me2
GADL1	Me2
LOC340357	Me2
SORBS1	Me2
TIMP2	Me2
PPP1R13L	Me2
LMO3	Me2
KIAA0922	Me2
PYGO2	Me2
TET1	Me2
SOBP	Me2
PCMTD2	Me2
CDRT1	Me2
SF1	Me2
SEC11A	Me2
KANK1	Me2
SLC10A6	Me2
FAM184B	Me2
PTRF	Me2
C8orf79	Me2
ST3GAL3	Me2
C1orf230	Me2
SULT1C4	Me2
RFTN2	Me2
SPATA17	Me2
BAMBI	Me2
DLC1	Me2
RAB32	Me2
SAMD13	Me2
IGSF11	Me2
RARA	Me2
GPRIN3	Me2
CYBRD1	Me2
RBPMS	Me2
EDNRB	Me2
AMFR	Me2
C13orf23	Me2
SEMA3B	Me2
DENND1A	Me2
NTNG1	Me2
NPAS3	Me2
DAB2	Me2
PLXNB1	Me2
LOC100130987	Me2
LOC100188947	Me2
CCDC68	Me2
NFIA	Me2
C1orf204	Me2
TTLL9	Me2
SVIL	Me2
CTDSP2	Me2
CSK	Me2
GARNL3	Me2
C11orf51	Me2
PPP1R3C	Me2
METTL13	Me2
PTPRS	Me2
GRAMD2	Me2
MAP3K11	Me2
CDC42EP1	Me2
H1F0	Me2
BMP4	Me2
RNF122	Me2
GSTP1	Me2
SAPS1	Me2
RBMXL1	Me2
RNF126	Me2
HSPA1A	Me2
C6orf226	Me2
MUC6	Me2
ZNF358	Me2
SLC5A10	Me2
ORAI1	Me2
HES5	Me2
SIGIRR	Me2
C9orf86	Me2
SAC3D1	Me2
NDOR1	Me2
IGSF5	Me2
ZNF766	Me2
PTCD1	Me2
HSD17B1	Me2
FSTL3	Me2
C10orf41	Me2
SLC27A5	Me2
C9orf69	Me2
SPEG	Me2
KLF16	Me2
IGF2BP2	Me2
C1orf127	Me2
GDPD5	Me2
FAM109B	Me2
PLD3	Me2
DDX21	Me2
CCDC87	Me2
WDR65	Me2
ZNF415	Me2
SUPT6H	Me2
MTAP	Me2
TARSL2	Me2
HPS5	Me2
GSTA3	Me2
EPS8L2	Me2
PHF13	Me2
LDHC	Me2
GGA3	Me2
COPG	Me2
RNF214	Me2
OTUD7B	Me2
SFRS8	Me2
ST13	Me2
RPL18A	Me2
TECR	Me2
NFATC1	Me2
PRSSL1	Me2
C19orf21	Me2
SEC16A	Me2
GM2A	Me2
GATA4	Me2
WIPI2	Me2
KDM4B	Me2
MAG	Me2
LOC221122	Me2
CPOX	Me2
PKLR	Me2
EEFSEC	Me2
ZNF506	Me2
FAM126A	Me2
CUTA	Me2
CLDN7	Me2
FBXW9	Me2
ARL16	Me2
NRG2	Me2
LRRN4CL	Me2
C14orf64	Me2
SYN3	Me2
KBTBD5	Me2
SNX29	Me2
RANGAP1	Me2
GMPR	Me2
SHB	Me2
CRY2	Me2
APOBEC2	Me2
TMEM45A	Me2
PTK7	Me2
ST6GALNAC6	Me2
LOC441869	Me2
COL11A2	Me2
DVL1	Me2
MYH9	Me2
MATN2	Me2
RBMS3	Me2
COL11A1	Me2
POSTN	Me2
C12orf51	Me2
SH3D19	Me2
PSD3	Me2
ATP6V0A1	Me2
MSC	Me2
ERBB3	Me2
CSRP1	Me2
PPFIBP2	Me2
MAP4	Me2
DPYSL2	Me2
KCNK2	Me2
RXRG	Me2
NAT8	Me2
PHYHD1	Me2
INHBA	Me2
RNF44	Me2
COL28A1	Me2
MAP1D	Me2
LYSMD4	Me2
TJAP1	Me2
ASB14	Me2
LSM2	Me2
PRRT4	Me2
TBX4	Me2
C20orf26	Me2
NAV1	Me2
DAO	Me2
PXN	Me2
HLF	Me2
ANKRD13A	Me2
RRAS2	Me2
KLF9	Me2
LDHD	Me2
FAM65B	Me2
QSOX2	Me2
CAMK2G	Me2
IQSEC1	Me2
CLCN6	Me2
SORBS2	Me2
MFAP2	Me2
SMOX	Me2
FAM190A	Me2
XAB2	Me2
RAPGEF5	Me2
BCAS3	Me2
D4S234E	Me2
C8orf46	Me2
HBE1	Me2
PIK3CD	Me2
MAL	Me2
LOC100129534	Me2
FAM129B	Me2
TCF7	Me2
JUP	Me2
USP44	Me2
MRAS	Me2
AGFG2	Me2
HYAL1	Me2
C1orf229	Me2
ZNF593	Me2
AFAP1L1	Me2
CYP27C1	Me2
CNNM4	Me2
MED21	Me2
FAM71E1	Me2
PIGY	Me2
OPA3	Me2
LOC729678	Me2
RPL21	Me2
LECT1	Me2
C6orf192	Me2
TXLNB	Me2
CDK15	Me2
POPDC2	Me2
GBE1	Me2
SMURF1	Me2
C7orf54	Me2
VIM	Me2
KIDINS220	Me2
KCNIP2	Me2
DUSP6	Me2
LOC100128640	Me2
AGBL5	Me2
C6orf218	Me2
PDCD4	Me2
LOC282997	Me2
RNLS	Me2
COL17A1	Me2
DPP9	Me2
RCAN1	Me2
CPS1	Me2
PBX1	Me2
C11orf41	Me2
GTF3C1	Me2
HKR1	Me2
C2orf55	Me2
SLC16A5	Me2
PPP1R3B	Me2
RAF1	Me2
SLC41A3	Me2
EXTL1	Me2
PRKCZ	Me2
MBNL2	Me2
FGF1	Me2
ZBTB38	Me2
SRCRB4D	Me2
C16orf55	Me2
KIAA0556	Me2
INCENP	Me2
AFF3	Me2
RXRB	Me2
OBSL1	Me2
CDCA7L	Me2
DBNL	Me2
NHP2L1	Me2
NEURL2	Me2
JPH4	Me2
FAM186B	Me2
MAMSTR	Me2
FAM69B	Me2
MPZ	Me2
ART3	Me2
ZNF516	Me2
DISP1	Me2
TMEM117	Me2
DAPL1	Me2
RPL22	Me2
DLG2	Me2
TMEM220	Me2
NCK2	Me2
APBB1	Me2
TMEM86A	Me2
NYNRIN	Me2
KIF1A	Me2
VAMP2	Me2
MGC16275	Me2
CAND2	Me2
EHD4	Me2
CORO2A	Me2
SH2D4B	Me2
PRUNE2	Me2
SH2D7	Me2
FOXO3	Me2
VASN	Me2
LMCD1	Me2
CCNG2	Me2
PDE4B	Me2
FDFT1	Me2
PRKCD	Me2
CCDC12	Me2
BAP1	Me2
MPRIP	Me2
ZNRF1	Me2
RADIL	Me2
MORN1	Me2
IL12RB2	Me2
RARB	Me2
FAM63A	Me2
MEF2C	Me2
NR6A1	Me2
C12orf49	Me2
SOX5	Me2
MTUS1	Me2
S100B	Me2
C3orf21	Me2
TLR1	Me2
HFE	Me2
ZDHHC19	Me2
C19orf56	Me2
PDXP	Me2
RAB34	Me2
DNASE2	Me2
GULP1	Me2
ZNF532	Me2
CCS	Me2
MINA	Me2
KLF15	Me2
ZNF718	Me2
ZNF550	Me2
IL17RC	Me2
ARHGEF17	Me2
FN3K	Me2
ACER3	Me2
RAB6B	Me2
IL11RA	Me2
LIMS2	Me2
CLEC16A	Me2
ZNF836	Me2
SDC4	Me2
JARID2	Me2
TEAD2	Me2
C7orf10	Me2
LIN7B	Me2
LDHA	Me2
STOML1	Me2
SMARCD2	Me2
TMEM53	Me2
IGSF8	Me2

## Sheet: Fig1B mRNA heatmap genes
Symbol	Clusters
LOXL4	Ex1
ENO3	Ex1
ITIH5L	Ex1
ARX	Ex1
NT5DC3	Ex1
CPVL	Ex1
TSPYL5	Ex1
NOX5	Ex1
ANO9	Ex1
MAT1A	Ex1
GLT25D2	Ex1
FIBCD1	Ex1
GRIN2A	Ex1
F5	Ex1
SEC14L2	Ex1
MYO5B	Ex1
NELL2	Ex1
KLF4	Ex1
ANXA1	Ex1
CD9	Ex1
TCN1	Ex1
CA8	Ex1
TFPI2	Ex1
TWIST1	Ex1
SYNJ2	Ex1
SLC17A5	Ex1
THBS2	Ex1
CD109	Ex1
NT5E	Ex1
HTATIP2	Ex1
TPD52	Ex1
FZD7	Ex1
ACSL1	Ex1
PTGER4	Ex1
PLN	Ex1
IFI16	Ex1
FAM20A	Ex1
GJA3	Ex1
DOCK10	Ex1
PROS1	Ex1
TBC1D4	Ex1
ACSL3	Ex1
NET1	Ex1
SIAE	Ex1
NNT	Ex1
TOP2A	Ex1
CENPF	Ex1
ATAD2	Ex1
VEGFA	Ex1
RYR3	Ex1
ABCC2	Ex1
TIAM2	Ex1
SYNE2	Ex1
FOS	Ex1
MGST1	Ex1
FLRT2	Ex1
RGS2	Ex1
DDIT4L	Ex1
PTPRR	Ex1
GFRA1	Ex1
LRP2	Ex1
RNF128	Ex1
PTPRK	Ex1
HTN3	Ex1
HTN1	Ex1
NOSTRIN	Ex1
RGS1	Ex1
ITGB8	Ex1
FGL2	Ex1
CD48	Ex1
GBP3	Ex1
CASP1	Ex1
SLAMF7	Ex1
FAM46C	Ex1
LAP3	Ex1
CLIC2	Ex1
EIF4G3	Ex1
RRM2B	Ex1
MDM2	Ex1
TP53INP1	Ex1
CAPZA1	Ex1
SNX10	Ex1
SAMD9L	Ex1
DDX60	Ex1
DDX60L	Ex1
PARP9	Ex1
PARP14	Ex1
TRIM22	Ex1
IFIT1	Ex1
CMPK2	Ex1
XAF1	Ex1
IFI44L	Ex1
MYOF	Ex1
MTSS1	Ex1
SLC9A3	Ex1
ULK4	Ex1
LY6K	Ex1
KIAA1644	Ex1
SPESP1	Ex1
FGF9	Ex1
PHACTR1	Ex1
EBF3	Ex1
MAL2	Ex1
KIF17	Ex1
COL14A1	Ex1
FMN2	Ex1
NEFH	Ex1
CACNA1H	Ex1
PTK2	Ex1
ASAP1	Ex1
ATP8B1	Ex1
RAB2A	Ex1
PRKDC	Ex1
KIAA0196	Ex1
ZNF704	Ex1
MCM4	Ex1
CHD7	Ex1
STOM	Ex1
ANXA4	Ex1
SQLE	Ex1
TCEB1	Ex1
DERL1	Ex1
MRPL15	Ex1
POLR2K	Ex1
ENY2	Ex1
SUSD5	Ex1
IGFBP7	Ex1
PRKCA	Ex1
C1orf95	Ex1
SEPHS2	Ex1
P4HA1	Ex1
SRD5A3	Ex1
KCNQ2	Ex1
BAI1	Ex1
FADS1	Ex1
SCG3	Ex1
PTPLA	Ex1
MATK	Ex1
GABRB3	Ex1
GABRA5	Ex1
HS6ST2	Ex1
PHYHIPL	Ex1
ABCA8	Ex1
RAPGEF4	Ex1
PTPRZ1	Ex1
PLCB4	Ex1
NRG3	Ex1
DZIP1	Ex1
SORL1	Ex1
ATP1B1	Ex1
TNFRSF19	Ex1
SLCO5A1	Ex1
PTPN13	Ex1
POLA1	Ex1
RGS5	Ex1
MPZL2	Ex1
SPARCL1	Ex1
SEMA5A	Ex1
DNAJC6	Ex1
SCCPDH	Ex1
FHDC1	Ex1
C2CD2	Ex1
GJA1	Ex1
MAP2	Ex1
PDE3B	Ex1
ERAP2	Ex1
ARHGAP24	Ex1
IL1R1	Ex1
ALDH1L2	Ex1
ASS1	Ex1
LY96	Ex1
LOC284837	Ex1
SLITRK2	Ex1
CPE	Ex1
COBL	Ex1
DOK5	Ex1
JAG1	Ex1
FKBP5	Ex1
SLC2A10	Ex1
C16orf45	Ex1
SCD5	Ex1
PRIMA1	Ex1
PLEKHG4B	Ex1
FAM70A	Ex1
CA12	Ex1
ASB9	Ex1
MDGA1	Ex1
ITPR2	Ex1
GALNTL4	Ex1
CARD11	Ex1
NQO1	Ex1
ELFN1	Ex1
AMN	Ex1
MGC16025	Ex1
HTRA3	Ex1
HTRA1	Ex1
GREB1	Ex1
IRX1	Ex1
LYN	Ex1
BAG2	Ex1
PAM	Ex1
RIMS2	Ex1
MYEOV	Ex1
LAMA1	Ex1
ARMC9	Ex1
DLL4	Ex1
CHAC1	Ex1
FABP3	Ex1
KIT	Ex1
ATP8B2	Ex1
PPM1K	Ex1
HTR2B	Ex1
SIPA1L2	Ex1
CELF2	Ex1
CADM1	Ex1
TSC22D1	Ex1
SEL1L3	Ex1
RAB31	Ex1
SDC2	Ex1
GEM	Ex1
SOCS2	Ex1
KIAA0802	Ex1
FEZ1	Ex1
BCAT1	Ex1
NIPAL4	Ex1
CYSLTR2	Ex1
TM7SF4	Ex1
ITGAX	Ex1
CFB	Ex1
C4A	Ex1
C2	Ex1
S100A6	Ex1
ISG20	Ex1
S100A4	Ex1
MALL	Ex1
MMP12	Ex1
CHI3L2	Ex1
CCDC64	Ex1
SGK1	Ex1
SLC16A6	Ex1
NPTX1	Ex1
SLC2A3	Ex1
PAEP	Ex1
LGALS3	Ex1
VGF	Ex1
ECM1	Ex1
ARC	Ex1
ADCY1	Ex1
LAMB3	Ex1
CEBPD	Ex1
RASGRF1	Ex1
PLCD4	Ex1
TUBB3	Ex1
SPHK1	Ex1
SLAMF8	Ex1
CD52	Ex1
LYZ	Ex1
ADAMDEC1	Ex1
HLA-DQA2	Ex1
HLA-DPA1	Ex1
CD74	Ex1
HLA-DRA	Ex1
HLA-DOA	Ex1
SPN	Ex1
LCP1	Ex1
IL2RB	Ex1
SASH3	Ex1
CORO1A	Ex1
PTPN6	Ex1
PRF1	Ex1
NKG7	Ex1
CTSW	Ex1
ITGAL	Ex1
IL2RG	Ex1
CST7	Ex1
CXCR3	Ex1
CD3E	Ex1
IL32	Ex1
CCL5	Ex1
GZMA	Ex1
GBP5	Ex1
CXCL9	Ex1
CD3D	Ex1
CD2	Ex1
LCK	Ex1
GZMK	Ex1
CD8B	Ex1
CD8A	Ex1
LTB	Ex1
ACAP1	Ex1
TBC1D10C	Ex1
CCR5	Ex1
PTPN7	Ex1
APOL3	Ex1
APOL1	Ex1
GBP4	Ex1
CCR2	Ex1
DOCK2	Ex1
CYBB	Ex1
PLEK	Ex1
IL10RA	Ex1
MS4A7	Ex1
MS4A6A	Ex1
LCP2	Ex1
GIMAP4	Ex1
IRF8	Ex1
PTPRC	Ex1
EVI2B	Ex1
CTSS	Ex1
CD209	Ex1
CD163L1	Ex1
PSMB8	Ex1
HLA-B	Ex1
HLA-F	Ex1
NLRC5	Ex1
B2M	Ex1
HCP5	Ex1
HLA-H	Ex1
HLA-A	Ex1
IFI27	Ex1
BST2	Ex1
ETV7	Ex1
IRF1	Ex1
CD27	Ex1
TAP1	Ex1
LAG3	Ex1
PSMB9	Ex1
WARS	Ex1
UBD	Ex1
IDO1	Ex1
GBP1	Ex1
CXCL10	Ex1
CXCR2P1	Ex1
GBP2	Ex1
FCGR3A	Ex1
STAT1	Ex1
APOL6	Ex1
BTN3A3	Ex1
BTN3A1	Ex1
CXCL13	Ex1
COL22A1	Ex1
IL18BP	Ex1
HLA-DMA	Ex1
SECTM1	Ex1
SLC15A3	Ex1
CECR1	Ex1
SPI1	Ex1
FCER1G	Ex1
TYROBP	Ex1
UCP2	Ex1
LGALS9	Ex1
C1QC	Ex1
C1QB	Ex1
C1QA	Ex1
TNFRSF1B	Ex1
HLA-DRB1	Ex1
HLA-DQA1	Ex1
HLA-DQB1	Ex1
HLA-DRB5	Ex1
LSP1	Ex1
CAPG	Ex1
IFI30	Ex1
CHIT1	Ex1
CCL18	Ex1
SPOCK2	Ex1
DHRS3	Ex1
TMEM176B	Ex1
TMEM176A	Ex1
C1S	Ex1
C1R	Ex1
SMOC2	Ex1
CCL19	Ex1
MMP9	Ex1
DERL3	Ex1
TNFAIP2	Ex1
PLEKHO1	Ex1
TYMP	Ex1
HMOX1	Ex1
RAC2	Ex1
ATP2A3	Ex1
POU2AF1	Ex1
LOC96610	Ex1
IGJ	Ex1
ADAM6	Ex1
OASL	Ex1
ISG15	Ex1
IFI6	Ex1
MX1	Ex1
IRF7	Ex1
IFITM1	Ex1
SAMD11	Ex1
NRXN2	Ex1
SCG5	Ex1
FAIM2	Ex1
CADM3	Ex1
TMEM59L	Ex1
MCHR1	Ex1
VAT1L	Ex1
GPM6A	Ex1
RAX	Ex1
MAOB	Ex1
SLC1A7	Ex1
CSDC2	Ex1
APLP1	Ex1
ABCA4	Ex1
TMEM130	Ex1
SULF1	Ex1
CP	Ex1
NEBL	Ex1
STRA6	Ex1
CLU	Ex1
C3	Ex1
SERPINA3	Ex1
CHI3L1	Ex1
HSD17B2	Ex1
DIO3	Ex1
SFRP2	Ex1
WFIKKN2	Ex1
OPTC	Ex1
CPAMD8	Ex1
CRYBB2	Ex1
LEFTY2	Ex1
COL9A2	Ex1
SLC38A3	Ex1
BMP7	Ex1
NGFR	Ex1
CDH23	Ex1
ATP1A2	Ex1
PTN	Ex1
SPON1	Ex1
SNCG	Ex1
CPT1C	Ex1
LTF	Ex1
PACSIN1	Ex1
MLC1	Ex1
IGSF21	Ex1
PLEKHB1	Ex1
NDUFA4L2	Ex1
TMEM132A	Ex1
SMOC1	Ex1
PI16	Ex1
MFAP4	Ex1
FAM107A	Ex1
IGFBP6	Ex1
ISLR	Ex1
GGT5	Ex1
EDN3	Ex1
DIO2	Ex1
CFH	Ex1
CXCL14	Ex1
CLIC6	Ex1
PTGDS	Ex1
SLC6A20	Ex1
LOC285629	Ex1
SLC6A13	Ex1
SLC22A8	Ex1
TTR	Ex1
SLC4A8	Ex1
ABCG4	Ex1
PRDM8	Ex1
INA	Ex1
NEFL	Ex1
CEND1	Ex1
ATP1A3	Ex1
C20orf103	Ex1
FSTL5	Ex1
CHGA	Ex1
PPP2R2C	Ex1
NTNG2	Ex1
GPR162	Ex1
PTPRD	Ex1
MAP1B	Ex1
BAALC	Ex1
KDR	Ex1
EGFLAM	Ex1
SYT2	Ex1
GAD1	Ex1
PPP2R2B	Ex1
CHN2	Ex1
GABBR2	Ex1
NDRG4	Ex1
CRYM	Ex1
ELOVL4	Ex1
AQP4	Ex1
SPOCK1	Ex1
NCAM1	Ex1
UNC13A	Ex1
SH3GL2	Ex1
DNER	Ex1
DIRAS2	Ex1
SYT11	Ex1
CA2	Ex1
RDH10	Ex1
PKIA	Ex1
SLC6A1	Ex1
KIF5C	Ex1
SLC1A3	Ex1
KCNJ10	Ex1
IMPG2	Ex1
IMPG1	Ex1
RP1	Ex1
RBP3	Ex1
KCNV2	Ex1
SLC1A2	Ex1
SYT1	Ex1
GNB3	Ex1
CRX	Ex1
PLCH2	Ex1
CRB1	Ex1
CDH2	Ex1
PROM1	Ex1
MAK	Ex1
GRM6	Ex1
SNAP25	Ex1
MFSD4	Ex1
GUCA1B	Ex1
NPVF	Ex1
C1orf61	Ex1
TF	Ex1
GFAP	Ex1
WIF1	Ex1
STAC2	Ex1
CRABP1	Ex1
PAPPA2	Ex1
PGAM2	Ex1
GDF1	Ex1
HSPB2	Ex1
CRYAB	Ex1
SSC5D	Ex1
SCARA3	Ex1
BAIAP3	Ex1
IGF2	Ex1
H19	Ex1
COL1A2	Ex1
S100A16	Ex1
CXCR4	Ex1
GNG4	Ex1
APOD	Ex1
GPR124	Ex1
FGFR1	Ex1
LTK	Ex1
PDGFRB	Ex1
NOTCH3	Ex1
THY1	Ex1
PLXDC1	Ex1
AQP1	Ex1
TAGLN	Ex1
AOC3	Ex1
MYH11	Ex1
PCOLCE	Ex1
BGN	Ex1
CD68	Ex1
TGFB1	Ex1
THBS1	Ex1
COL12A1	Ex1
LAMB1	Ex1
SERPINE1	Ex1
FN1	Ex1
COL5A1	Ex1
COL1A1	Ex1
COL4A2	Ex1
COL4A1	Ex1
COL6A3	Ex1
APLN	Ex1
SEMA7A	Ex1
PRAME	Ex1
EMILIN1	Ex1
C16orf89	Ex1
ART5	Ex1
SCIN	Ex1
ACOX2	Ex1
HIST1H2BK	Ex1
HIST1H1C	Ex1
HIST1H2AC	Ex1
MXRA8	Ex1
CD248	Ex1
DPYSL4	Ex1
HIF3A	Ex1
EVPL	Ex1
SNCB	Ex1
KIF1A	Ex1
SYN1	Ex1
CABP7	Ex1
C21orf56	Ex1
SERPINF1	Ex1
PCDHGB7	Ex1
FZD9	Ex1
CHRM1	Ex1
IRX6	Ex1
MIA	Ex1
C1orf170	Ex1
SOD3	Ex1
ATP6V0A4	Ex1
FOXM1	Ex1
CDT1	Ex1
SLC19A1	Ex1
SCARF2	Ex1
GHDC	Ex1
FSCN1	Ex1
RAC3	Ex1
NXN	Ex1
PLOD3	Ex1
GALK1	Ex1
TMEM214	Ex1
ATP13A1	Ex1
GCAT	Ex1
DPM2	Ex1
TMEM179B	Ex1
SIPA1	Ex1
PTMS	Ex1
NDUFS8	Ex1
LMF2	Ex1
RNASEK	Ex1
LGALS3BP	Ex1
SH3BGRL3	Ex1
OSGIN1	Ex1
CYBA	Ex1
NUDT14	Ex1
HSD17B14	Ex1
SPATA20	Ex1
MACROD1	Ex1
RNPEPL1	Ex1
PNKP	Ex1
FXYD5	Ex1
SEMA3F	Ex1
PLVAP	Ex1
PGF	Ex1
CCL14	Ex1
VWA1	Ex1
ABCD1	Ex1
PIK3R6	Ex1
HBB	Ex1
HBA2	Ex1
HBA1	Ex1
TIMP1	Ex1
PRAF2	Ex1
LSMD1	Ex1
KRTCAP2	Ex1
PPP1R9B	Ex1
NRSN2	Ex1
PLTP	Ex1
EHD2	Ex1
IFITM3	Ex1
IFITM2	Ex1
LGALS1	Ex1
CSTB	Ex1
CBR3	Ex1
TAGLN2	Ex1
ADAM15	Ex1
EMP3	Ex1
CRIP2	Ex1
CRIP1	Ex1
SUSD2	Ex1
PDLIM1	Ex1
VTN	Ex1
PCDHGC3	Ex1
TNFRSF1A	Ex1
TCIRG1	Ex1
BAX	Ex1
TMEM161A	Ex1
DDRGK1	Ex1
SIL1	Ex1
HM13	Ex1
G6PC3	Ex1
MPDU1	Ex1
POR	Ex1
MCOLN1	Ex1
GBA	Ex1
GBAP1	Ex1
SNX8	Ex1
MAD1L1	Ex1
CYGB	Ex1
GPC1	Ex1
COMT	Ex1
RNASEH2C	Ex1
RENBP	Ex1
RAMP1	Ex1
TSTA3	Ex1
GRINA	Ex1
C8orf30A	Ex1
GPAA1	Ex1
VPS28	Ex1
SHARPIN	Ex1
MGC70857	Ex1
GPR172A	Ex1
EXOSC4	Ex1
DGAT1	Ex1
NAPRT1	Ex1
SLC39A4	Ex1
MFSD3	Ex1
LY6E	Ex1
PARP10	Ex1
SLC1A5	Ex1
BOP1	Ex1
KDELR3	Ex1
ISM1	Ex1
SPON2	Ex1
ADCY2	Ex1
OAF	Ex1
GGT1	Ex1
MAP3K12	Ex1
CNTNAP1	Ex1
NFATC4	Ex1
MAP1A	Ex1
COL5A3	Ex1
CDC25B	Ex1
DYSF	Ex1
SPARC	Ex1
NCS1	Ex1
IDH2	Ex1
FKBP10	Ex1
LINGO1	Ex1
GDF11	Ex1
COTL1	Ex1
SH3PXD2B	Ex1
TGFBI	Ex1
PXDN	Ex1
MRC2	Ex1
IGFBP2	Ex1
TMEM119	Ex1
ADAMTS2	Ex1
MMP2	Ex1
ANK1	Ex1
SLC22A18	Ex1
RAP1GAP	Ex1
TRIM47	Ex1
ORAI1	Ex1
TRPM2	Ex1
EEF1A2	Ex1
TAPBPL	Ex1
CD5L	Ex1
SLIT1	Ex1
ACSBG1	Ex1
NELF	Ex1
BAIAP2L2	Ex1
PTP4A3	Ex1
C8orf55	Ex1
CYC1	Ex1
MAPK12	Ex1
MGST2	Ex1
LTBR	Ex1
TUBA8	Ex1
SULT1A1	Ex1
S100A1	Ex1
PRKCDBP	Ex1
FERMT3	Ex1
TMEM200B	Ex1
TRPV2	Ex1
SLC1A4	Ex1
SGSM2	Ex1
COL9A3	Ex1
CSPG4	Ex1
C1orf116	Ex1
WFDC1	Ex1
SLC45A2	Ex1
ADAM23	Ex1
SOX1	Ex1
TSPAN10	Ex1
EPHX1	Ex1
RBPMS2	Ex1
FLNC	Ex1
ADAM33	Ex1
CNTFR	Ex1
MDFI	Ex1
CPXM1	Ex1
GSG1L	Ex1
ADAM12	Ex1
PENK	Ex1
WSCD1	Ex1
MGLL	Ex1
TTYH3	Ex1
NECAB2	Ex1
HES6	Ex1
ADAM11	Ex1
FKBP11	Ex1
JAG2	Ex1
COL18A1	Ex1
MAPT	Ex1
HCN2	Ex1
CPLX1	Ex1
CTNND2	Ex1
SFXN3	Ex1
SCN1B	Ex1
GRID1	Ex1
FMNL1	Ex1
CITED1	Ex1
PFKP	Ex1
AHNAK2	Ex1
TPPP	Ex1
TMEM173	Ex1
ASTN2	Ex1
GPR56	Ex1
ALK	Ex1
RTN4RL1	Ex1
CDH1	Ex1
SLC16A3	Ex1
ESPN	Ex1
MT2A	Ex1
MT1E	Ex1
PPAP2C	Ex1
GDF15	Ex1
FAM167B	Ex1
ALDH4A1	Ex1
PTPRU	Ex1
CD79B	Ex1
PDE1B	Ex1
ADRA2A	Ex1
GPRC5A	Ex1
CPNE5	Ex1
AGT	Ex1
TSTD1	Ex1
FLJ16779	Ex1
SCUBE1	Ex1
C1QTNF1	Ex1
CREB3L1	Ex1
PTGES	Ex1
MDK	Ex1
SLC22A17	Ex1
ATP1B2	Ex1
REEP2	Ex1
RARRES2	Ex1
CLIP3	Ex1
F7	Ex1
CCND2	Ex1
UCHL1	Ex1
RPS6KA2	Ex1
SLC38A5	Ex1
OLFM2	Ex1
FADS2	Ex1
MEIS3	Ex1
SSX5	Ex1
SSX4	Ex1
SSX1	Ex1
PCDHGA12	Ex1
PHGDH	Ex1
MICAL1	Ex1
NCALD	Ex1
CORO2B	Ex1
HSPB8	Ex1
CES1	Ex1
SULF2	Ex1
MAN1C1	Ex1
ITGA5	Ex1
ECE1	Ex1
CDKN1A	Ex1
ACTA2	Ex1
ZNF385A	Ex1
RHBDD2	Ex1
NBL1	Ex1
FAM176B	Ex1
RPP25	Ex1
NEURL	Ex1
TUBA4A	Ex1
EYA2	Ex1
PCSK2	Ex1
CGNL1	Ex1
PGCP	Ex1
ZFYVE16	Ex1
IFRD1	Ex1
BTBD3	Ex1
ABCA5	Ex1
ZMYND11	Ex1
USO1	Ex1
KIAA1109	Ex1
FRYL	Ex1
FMR1	Ex1
COPS2	Ex1
CCNG1	Ex1
NAMPT	Ex1
CAPZA2	Ex1
TAX1BP1	Ex1
TMEM123	Ex1
SGTB	Ex1
ERBB2IP	Ex1
ACADSB	Ex1
RAB3GAP2	Ex1
NEK7	Ex1
TSNAX	Ex1
CD46	Ex1
EGLN1	Ex1
PIGA	Ex1
EIF1AX	Ex1
FGD4	Ex1
CPEB2	Ex1
GULP1	Ex1
PLEKHA5	Ex1
CDKN1B	Ex1
MEGF9	Ex1
SP3	Ex1
NCKAP1	Ex1
BMPR2	Ex1
KIAA1715	Ex1
ZFR	Ex1
SMCHD1	Ex1
TTC37	Ex1
ELF1	Ex1
EPS8	Ex1
STAG2	Ex1
MIB1	Ex1
UBE3A	Ex1
RANBP2	Ex1
PRPF40A	Ex1
TRPM7	Ex1
SF3B1	Ex1
CHD9	Ex1
BTAF1	Ex1
MTR	Ex1
ZNF146	Ex1
SOCS6	Ex1
GPAM	Ex1
USP47	Ex1
BCLAF1	Ex1
HSP90AA1	Ex1
ZNF33A	Ex1
LARP7	Ex1
NIPBL	Ex1
JMJD1C	Ex1
ZNF638	Ex1
MATR3	Ex1
GPBP1	Ex1
TAF7	Ex1
DNTTIP2	Ex1
DNM1L	Ex1
RAD50	Ex1
KTN1	Ex1
NOP58	Ex1
SSB	Ex1
CEBPZ	Ex1
TTC3	Ex1
C10orf28	Ex1
PRPF38B	Ex1
GCC2	Ex1
SMG1	Ex1
HNRNPH1	Ex1
LRRFIP1	Ex1
GLS	Ex1
RB1CC1	Ex1
PCMTD1	Ex1
AKAP9	Ex1
SFRS2IP	Ex1
KIF5B	Ex1
PPP1R12A	Ex1
ATRX	Ex1
THOC2	Ex1
CCAR1	Ex1
PPIG	Ex1
SLK	Ex1
ROCK1	Ex1
BOD1L	Ex1
SPAG9	Ex1
C10orf18	Ex1
IPO7	Ex1
DDX21	Ex1
CAND1	Ex1
IL6ST	Ex1
DDX3X	Ex1
SETX	Ex1
BIRC6	Ex1
HIF1A	Ex1
MPDZ	Ex1
PHKB	Ex1
MGAT4A	Ex1
RBL2	Ex1
LONP2	Ex1
FNIP2	Ex1
CLCN3	Ex1
ZNF192	Ex1
ZKSCAN1	Ex1
STT3B	Ex1
KCTD20	Ex1
LOC653653	Ex1
TIA1	Ex1
ETNK1	Ex1
BRWD1	Ex1
SFRS7	Ex1
RBM25	Ex1
ZNF451	Ex1
N4BP2L2	Ex1
SMARCAD1	Ex1
VPS13C	Ex1
KIAA1033	Ex1
EID1	Ex1
WSB1	Ex1
AHSA2	Ex1
ANKRD10	Ex1
NFAT5	Ex1
LOC162632	Ex1
CREBZF	Ex1
ARGLU1	Ex1
OGT	Ex1
LUC7L3	Ex1
DMTF1	Ex1
FNBP4	Ex1
RBM39	Ex1
NCRNA00201	Ex1
MDM4	Ex1
SFRS12	Ex1
SFRS11	Ex1
ZRANB2	Ex1
CLK1	Ex1
CCNL2	Ex1
GOLGA8B	Ex1
GOLGA8A	Ex1
HERC2P2	Ex1
NEAT1	Ex1
ZMAT1	Ex1
PILRB	Ex1
SFRS6	Ex1
MALAT1	Ex1
CDK6	Ex1
ABCA1	Ex1
HERC5	Ex1
RNF11	Ex1
ACADM	Ex1
DOCK7	Ex1
2021-09-15	Ex1
PKN2	Ex1
USP33	Ex1
DR1	Ex1
EPS15	Ex1
TDRD7	Ex1
OSTM1	Ex1
SLC38A2	Ex1
CPEB4	Ex1
CLIP1	Ex1
COL4A3BP	Ex1
AFF4	Ex1
PJA2	Ex1
WDR11	Ex1
ITGAV	Ex1
PPIP5K2	Ex1
FNIP1	Ex1
DMXL1	Ex1
MYO5A	Ex1
MTMR10	Ex1
RCN2	Ex1
BTBD1	Ex1
TMEM167A	Ex1
CCPG1	Ex1
DNAJC10	Ex1
PGRMC1	Ex1
CASC4	Ex1
KIAA1598	Ex1
RHOQ	Ex1
HSD17B12	Ex1
LRRC39	Ex1
CYP4V2	Ex1
NAPB	Ex1
PTPN11	Ex1
IQGAP1	Ex1
TPR	Ex1
RDX	Ex1
ADAM9	Ex1
SOAT1	Ex1
CTSO	Ex1
LMAN1	Ex1
DNAJC3	Ex1
2021-09-02	Ex1
ELP2	Ex1
GALNT3	Ex1
DLG1	Ex1
PPP2R5A	Ex1
UTRN	Ex1
KLF9	Ex1
PTPRB	Ex1
AKAP12	Ex1
TMTC1	Ex1
PRKG2	Ex1
MAPK8IP3	Ex1
GABBR1	Ex1
MFSD6	Ex1
LONRF2	Ex1
SOD2	Ex1
CAST	Ex1
OPTN	Ex1
SOS1	Ex1
CDC42BPA	Ex1
SEC63	Ex1
REV3L	Ex1
SPCS3	Ex1
RUFY3	Ex1
BDH2	Ex1
RDH11	Ex1
PGAP1	Ex1
SGK3	Ex1
ANKRD30B	Ex1
SETD7	Ex1
INPP5F	Ex1
NRCAM	Ex1
DCLK1	Ex1
VAV3	Ex1
AKAP6	Ex1
RASSF2	Ex1
GNB5	Ex1
PDE4DIP	Ex1
MAP7	Ex1
PTP4A1	Ex1
CD164	Ex1
TGFBR1	Ex1
SESN1	Ex1
NT5DC1	Ex1
TMEM181	Ex1
STX7	Ex1
SERINC1	Ex1
TAB2	Ex1
QKI	Ex1
UBE2J1	Ex1
LYRM2	Ex1
SYNE1	Ex1
SEPP1	Ex1
CDK19	Ex1
AMD1	Ex1
SNX9	Ex1
HDAC2	Ex1
MLLT4	Ex1
FNBP1L	Ex1
DNAJB4	Ex1
ARFGAP3	Ex1
RPS6KA3	Ex1
ARHGAP21	Ex1
STXBP5	Ex1
TMEM30A	Ex1
PHF3	Ex1
PCM1	Ex1
ZNF292	Ex1
SFRS18	Ex1
SENP6	Ex1
PHIP	Ex1
FAM184A	Ex1
GOLGB1	Ex1
GOLGA4	Ex1
SMC6	Ex1
TRIM2	Ex1
ZNF33B	Ex1
CEP57	Ex1
GLCE	Ex1
SMC3	Ex1
PNN	Ex1
CCDC104	Ex1
UACA	Ex1
PRPF4B	Ex1
CD2AP	Ex1
DEK	Ex1
ICK	Ex1
PDCD6IP	Ex1
GNL3	Ex1
C6orf62	Ex1
TTC14	Ex1
NKTR	Ex1
SR140	Ex1
CCNL1	Ex1
NPHP3	Ex1
ACAD11	Ex1
WDR52	Ex1
SLC25A27	Ex1
GPCPD1	Ex1
SLC25A36	Ex1
CCDC14	Ex1
RBM6	Ex1
PCMTD2	Ex1
EFHA2	Ex1
CEP170	Ex1
ARHGAP5	Ex1
FAM126A	Ex1
OSBPL8	Ex1
LPGAT1	Ex1
FMNL2	Ex1
CHML	Ex1
KLF6	Ex1
ZBTB38	Ex1
BMI1	Ex1
MBNL2	Ex1
PCNP	Ex1
BBX	Ex1
KAT2B	Ex1
NR1D2	Ex1
WASF3	Ex1
FAM169A	Ex1
SEC62	Ex1
MBNL1	Ex1
ANKRD28	Ex1
UBL3	Ex1
SSFA2	Ex1
SECISBP2L	Ex1
PLDN	Ex1
TOP2B	Ex1
CLASP2	Ex1
ADD3	Ex1
PBRM1	Ex1
LRRC58	Ex1
ZDBF2	Ex1
LYST	Ex1
XPOT	Ex1
IARS	Ex1
ANO6	Ex1
SPIRE1	Ex1
2021-09-11	Ex1
VLDLR	Ex1
KIAA0020	Ex1
ROD1	Ex1
GNPTAB	Ex1
SMARCA5	Ex1
PIK3C2A	Ex1
PSME4	Ex1
TAOK3	Ex1
TMEM165	Ex1
PRDX3	Ex1
MAGT1	Ex1
PARP4	Ex1
EPRS	Ex1
HSPH1	Ex1
PLXNC1	Ex1
ADAM10	Ex1
PGM2	Ex1
OXCT1	Ex1
NDUFS1	Ex1
ARFGEF2	Ex1
ZBTB10	Ex1
NCOA2	Ex1
SAPS3	Ex1
ATM	Ex1
ZC3H7A	Ex1
WDR36	Ex1
ZMYM2	Ex1
FNDC3A	Ex1
SPG20	Ex1
USP34	Ex1
PDS5A	Ex1
SMEK2	Ex1
FBXO11	Ex1
XPO1	Ex1
UBXN4	Ex1
2021-09-10	Ex1
WDR43	Ex1
DDX1	Ex1
PTCD3	Ex1
ZC3H12C	Ex1
UBA2	Ex1
COPB1	Ex1
TOR1AIP1	Ex1
2021-09-07	Ex1
SRPK2	Ex1
SLC30A9	Ex1
KIAA0232	Ex1
KIF21A	Ex1
MAP4K3	Ex1
C12orf23	Ex1
TNPO1	Ex1
C5orf24	Ex1
RABEP1	Ex1
PTPN12	Ex1
EPT1	Ex1
IFT81	Ex1
CBX3	Ex1
TTL	Ex1
SGCD	Ex1
PSMD14	Ex1
PSMA4	Ex1
PAIP2	Ex1
PSMA3	Ex1
TRAK2	Ex1
GPM6B	Ex1
SNX25	Ex1
DNAJC13	Ex1
PAG1	Ex1
LIMA1	Ex1
SLC5A3	Ex1
RNF145	Ex1
SLC11A2	Ex1
GFPT1	Ex1
TFRC	Ex1
TCF12	Ex1
STAM	Ex1
RTTN	Ex1
HEATR5A	Ex1
HECTD1	Ex1
INPP4B	Ex1
STK32A	Ex1
CHSY3	Ex1
RAB27A	Ex1
MET	Ex1
PPFIBP1	Ex1
PKD2	Ex1
C18orf1	Ex1
YTHDF3	Ex1
VCPIP1	Ex1
UBE2W	Ex1
TRAM1	Ex1
LYPLA1	Ex1
PEX2	Ex1
MTFR1	Ex1
IMPA1	Ex1
UBE2V2	Ex1
MRPS28	Ex1
TCEA1	Ex1
IMPAD1	Ex1
TMEM68	Ex1
TGS1	Ex1
ATP6V1H	Ex1
NSMAF	Ex1
KIAA0146	Ex1
UBXN2B	Ex1
RNF139	Ex1
FAM49B	Ex1
TMEM70	Ex1
MRPL13	Ex1
FAM82B	Ex1
COPS5	Ex1
CYP51A1	Ex1
NBN	Ex1
MTDH	Ex1
SLC25A32	Ex1
ATP6V1C1	Ex1
KIAA1429	Ex1
DCAF13	Ex1
INTS8	Ex1
RAD21	Ex1
AZIN1	Ex1
CPNE3	Ex1
TMEM64	Ex1
CLIC4	Ex1
SLC35F5	Ex1
ACTR3	Ex1
TANC1	Ex1
PLEKHF2	Ex1
PLEKHA1	Ex1
PHF20L1	Ex1
DPY19L4	Ex1
OXR1	Ex1
FAM91A1	Ex1
TTC35	Ex1
RNF19A	Ex1
TMEM55A	Ex1
WWP1	Ex1
ASPH	Ex1
EFR3A	Ex1
TERF1	Ex1
ARFGEF1	Ex1
ARMC1	Ex1
VPS13B	Ex1
TAF2	Ex1
UBR5	Ex1
PLA1A	Ex2
CD200	Ex2
FAM65B	Ex2
LRRC16A	Ex2
C3orf58	Ex2
GSTT1	Ex2
HCG4	Ex2
DLGAP3	Ex2
TMPRSS13	Ex2
RPH3A	Ex2
MPP4	Ex2
DYNC1I1	Ex2
SV2B	Ex2
NALCN	Ex2
NTRK2	Ex2
UTY	Ex2
USP9Y	Ex2
RPS4Y1	Ex2
PRKY	Ex2
CYorf15B	Ex2
HHATL	Ex2
C8orf75	Ex2
MAP3K5	Ex2
FAM176A	Ex2
KIAA1217	Ex2
FAM129A	Ex2
ABLIM1	Ex2
PPARG	Ex2
COX6A2	Ex2
YJEFN3	Ex2
CPXM2	Ex2
NTNG1	Ex2
AFF3	Ex2
SPP1	Ex2
FAP	Ex2
PDGFD	Ex2
MPPED2	Ex2
ZC3H13	Ex2
ETV1	Ex2
HOXD1	Ex2
SORBS2	Ex2
PHLDA1	Ex2
SYNPR	Ex2
ID2	Ex2
TIMP3	Ex2
CCDC80	Ex2
LTBP1	Ex2
LOC100302650	Ex2
GRIK3	Ex2
BEX1	Ex2
HLF	Ex2
CHRNB2	Ex2
TSPAN7	Ex2
PRICKLE2	Ex2
CHL1	Ex2
LGI4	Ex2
FXYD3	Ex2
VWA5A	Ex2
PLIN2	Ex2
SCRN1	Ex2
DNALI1	Ex2
PHKA1	Ex2
CHGB	Ex2
AP3B2	Ex2
CKMT1B	Ex2
ERVFRDE1	Ex2
ASB10	Ex2
PLIN4	Ex2
ITGB1BP3	Ex2
PSG4	Ex2
LAD1	Ex2
RORC	Ex2
MUC7	Ex2
ARHGEF35	Ex2
SLC3A1	Ex2
EPCAM	Ex2
TFPI	Ex2
KYNU	Ex2
POSTN	Ex2
ADAMTS1	Ex2
HSPA7	Ex2
SLC38A1	Ex2
DENND2D	Ex2
LY75	Ex2
LRRK2	Ex2
FAM3C	Ex2
LOC344595	Ex2
ST3GAL6	Ex2
NARS2	Ex2
SYNM	Ex2
CSGALNACT1	Ex2
ANXA3	Ex2
LOX	Ex2
DSG2	Ex2
ZHX1	Ex2
RNF144B	Ex2
PDCD4	Ex2
E2F3	Ex2
PLP1	Ex2
ZNF560	Ex2
CCL28	Ex2
SH3D19	Ex2
ENTPD1	Ex2
RPS3A	Ex2
RPL17	Ex2
TAF1D	Ex2
RPL5	Ex2
EEF1A1	Ex2
EEF1A1P9	Ex2
FXR1	Ex2
EIF2A	Ex2
C3orf17	Ex2
CCDC50	Ex2
TOMM70A	Ex2
CNBP	Ex2
KLHL24	Ex2
ATP13A3	Ex2
CMTM6	Ex2
HMCN1	Ex2
GPR37	Ex2
LRRC1	Ex2
CDH19	Ex2
KCNK2	Ex2
CCDC68	Ex2
COL11A2	Ex2
SEMA3C	Ex2
SORBS1	Ex2
GPRIN3	Ex2
MYLIP	Ex2
MCF2	Ex2
GNAI1	Ex2
HCN1	Ex2
ANK3	Ex2
TMEM47	Ex2
ID4	Ex2
LOC399959	Ex2
KLHL3	Ex2
PPP1R9A	Ex2
PEG10	Ex2
FAM38B	Ex2
COL24A1	Ex2
SLC6A6	Ex2
COBLL1	Ex2
ZNF532	Ex2
ROBO1	Ex2
PEG3	Ex2
TRPM1	Ex2
SOSTDC1	Ex2
DCT	Ex2
C7orf58	Ex2
PRUNE2	Ex2
C11orf41	Ex2
TLR4	Ex2
SLC7A2	Ex2
KCNQ5	Ex2
PSD3	Ex2
C8orf79	Ex2
DMD	Ex2
SASH1	Ex2
MFAP3L	Ex2
ATP8A1	Ex2
SPRY1	Ex2
CADPS2	Ex2
TTLL3	Ex2
MYO15B	Ex2
LPAR6	Ex2
ARRDC3	Ex2
SETD5	Ex2
LPIN1	Ex2
HOOK1	Ex2
ABCC5	Ex2
EMCN	Ex2
SLC25A30	Ex2
ARHGEF37	Ex2
PDE3A	Ex2
PCDH20	Ex2
ZNF549	Ex2
C8orf46	Ex2
SHC4	Ex2
KCNS3	Ex2
MEGF10	Ex2
CNTN3	Ex2
C4orf19	Ex2
BEX4	Ex2
PPP1R3C	Ex2
NFIA	Ex2
EIF4A2	Ex2
EIF1B	Ex2
EFCAB1	Ex2
SLC44A3	Ex2
RBP7	Ex2
RAPGEF3	Ex2
IGHMBP2	Ex2
SERPINB9	Ex2
GSTA3	Ex2
ROPN1	Ex2
ROPN1B	Ex2
RNF43	Ex2
BAMBI	Ex2
IL12RB2	Ex2
C6orf218	Ex2
D4S234E	Ex2
KIF6	Ex2
C6orf176	Ex2
PERP	Ex2
ZDHHC2	Ex2
CAT	Ex2
SNCA	Ex2
ENPP1	Ex2
MID1	Ex2
BCHE	Ex2
MPZ	Ex2
ERBB3	Ex2
DLC1	Ex2
C6orf142	Ex2
NEDD9	Ex2
MATN2	Ex2
GFRA3	Ex2
PDE4B	Ex2
COL11A1	Ex2
NCKAP5	Ex2
EDNRB	Ex2
LMCD1	Ex2
GPD1L	Ex2
SOBP	Ex2
AMOTL2	Ex2
SATB1	Ex2
MTUS1	Ex2
PPP1R3B	Ex2
HNMT	Ex2
TIPARP	Ex2
SLC6A15	Ex2
ENPP2	Ex2
AHCYL2	Ex2
TJP2	Ex2
CTNNB1	Ex2
MARCKS	Ex2
TFAP2A	Ex2
PLXNB1	Ex2
LNP1	Ex2
GATA4	Ex2
MTMR14	Ex2
LIMS2	Ex2
PRKCD	Ex2
SLC25A38	Ex2
CTF1	Ex2
CDCA7L	Ex2
BAP1	Ex2
ACSF2	Ex2
FAM86D	Ex2
CAND2	Ex2
ALDH1L1	Ex2
KLC3	Ex2
AZGP1	Ex2
PLCD1	Ex2
C3orf39	Ex2
SLC41A3	Ex2
IFT122	Ex2
FBXO17	Ex2
NCRNA00086	Ex2
DUSP15	Ex2
TMEM185A	Ex2
HDAC11	Ex2
JUP	Ex2
RAB11FIP1	Ex2
FDFT1	Ex2
EPHX2	Ex2
TRIOBP	Ex2
LOC100188947	Ex2
LOC100127888	Ex2
RYR1	Ex2
OVOL1	Ex2
LOC154822	Ex2
ZSCAN18	Ex2
PLEKHG4	Ex2
CPS1	Ex2
GSTO2	Ex2
HPGD	Ex2
C3orf32	Ex2
RNF208	Ex2
CLEC11A	Ex2
NDN	Ex2
MYH14	Ex2
KIAA1543	Ex2
ABCA3	Ex2
RPL32	Ex2
RPL14	Ex2
RPL29	Ex2
QARS	Ex2
RPL35A	Ex2
RPL24	Ex2
RPL15	Ex2
RPSA	Ex2
RPSAP58	Ex2
SNHG7	Ex2
LTA4H	Ex2
NCRNA00219	Ex2
C6orf48	Ex2
LOC441869	Ex2
ATAD3C	Ex2
DENND1C	Ex2
GLIS1	Ex2
LDHC	Ex2
STAP2	Ex2
PYCARD	Ex2
CNN2	Ex2
GSTM2	Ex2
GSTM1	Ex2
ALDH3B1	Ex2
AG2	Ex2
JPH2	Ex2
SLC9A3R1	Ex2
PYGB	Ex2
SLC7A5	Ex2
GJB1	Ex2
SF3B5	Ex2
JUND	Ex2
SMPD2	Ex2
TESK1	Ex2
FCGRT	Ex2
TNFSF12	Ex2
TNK2	Ex2
H1FX	Ex2
ZBTB47	Ex2
DUSP8	Ex2
APBB1	Ex2
TMEM8B	Ex2
PLA2G15	Ex2
CD82	Ex2
DUOX1	Ex2
TGFB1I1	Ex2
DDAH2	Ex2
PCBP4	Ex2
PCBP3	Ex2
RHCG	Ex2
DPP6	Ex2
LDOC1	Ex2
ASPHD1	Ex2
SHF	Ex2
NT5DC2	Ex2
MARCKSL1	Ex2
HHLA3	Ex2
GLTPD1	Ex2
C1orf93	Ex2
ACP5	Ex2
ZNF580	Ex2
SLC25A1	Ex2
TMEM115	Ex2
ALG3	Ex2
PODXL2	Ex2
FHL3	Ex2
PML	Ex2
C16orf5	Ex2
VEGFB	Ex2
NDUFAF3	Ex2
TADA3	Ex2
RFNG	Ex2
SLC25A23	Ex2
MAN2B1	Ex2
LOC100130776	Ex2
PRR5	Ex2
PCYT2	Ex2
AZI1	Ex2
HSPB1	Ex2
?	Ex2
SILV	Ex2
FAHD2A	Ex2
LTBP4	Ex2
ATG2A	Ex2
SERPING1	Ex2
PALM	Ex2
FSTL3	Ex2
PTRF	Ex2
HR	Ex2
SORBS3	Ex2
RBPMS	Ex2
NUDT18	Ex2
TBC1D17	Ex2
SOX10	Ex2
DENND1A	Ex2
TAX1BP3	Ex2
GABARAP	Ex2
MAP3K11	Ex2
ARL2	Ex2
LOC92249	Ex2
SLC7A4	Ex2
FN3K	Ex2
USP11	Ex2
PDK2	Ex2
CD99	Ex2
NCKAP5L	Ex2
CDC42EP1	Ex2
ZFPM1	Ex2
TRIM28	Ex2
SNRPA	Ex2
PRKCSH	Ex2
EPN1	Ex2
UBA52	Ex2
RPL28	Ex2
RPLP2	Ex2
DNAJC4	Ex2
UBXN1	Ex2
C11orf2	Ex2
TST	Ex2
MPST	Ex2
DALRD3	Ex2
ABHD14B	Ex2
TKT	Ex2
VIM	Ex2
NFKBIL1	Ex2
IMPDH2	Ex2
EIF3G	Ex2
ECSIT	Ex2
ZNF581	Ex2
RPL13	Ex2
GLTSCR2	Ex2
CSNK2A2	Ex2
SLC25A6	Ex2
RPL18	Ex2
RPL18A	Ex2
RPS2	Ex2
RPS15	Ex2
FBL	Ex2
RPS9	Ex2
RPS19	Ex2
MFRP	Ex2
AEBP1	Ex2
EPB49	Ex2
GPR137	Ex2
CST3	Ex2
SCAND1	Ex2
MAP1LC3A	Ex2
H2AFJ	Ex2
SNTA1	Ex2
LGI3	Ex2
RCN3	Ex2
MYL9	Ex2
FKBP8	Ex2
FAM195B	Ex2
PPDPF	Ex2
DCXR	Ex2
EIF4EBP1	Ex2
C9orf16	Ex2
ATP5D	Ex2
C19orf24	Ex2
NDUFA3	Ex2
C16orf13	Ex2
DPP7	Ex2
TECR	Ex2
RHOG	Ex2
CTSD	Ex2
ZNF358	Ex2
SF3A2	Ex2
IRF2BP1	Ex2
BSG	Ex2
PC	Ex2
CYBASC3	Ex2
NCKIPSD	Ex2
MIB2	Ex2
MFAP2	Ex2
GPR153	Ex2
HSPG2	Ex2
EXTL1	Ex2
MAL	Ex2
ADRA2C	Ex2
RTN2	Ex2
ABTB1	Ex2
RPUSD3	Ex2
JAGN1	Ex2
IL17RC	Ex2
CRELD1	Ex2
GSTP1	Ex2
APOE	Ex2
MYO7B	Ex2
HYAL1	Ex2
HSD17B1	Ex2
WISP2	Ex2
BCAS4	Ex2
LRRC33	Ex2
DLL3	Ex2
SPINT1	Ex2
FAM178B	Ex2
ADPRHL1	Ex2
PRRT4	Ex2
GIPC3	Ex2
LDHD	Ex2
RADIL	Ex2
MSC	Ex2
PDK4	Ex2
SEC14L5	Ex2
ELFN2	Ex2
DNAH2	Ex2
XAGE2	Ex2
UGT3A2	Ex2
MME	Ex2
CYP19A1	Ex2
PRODH	Ex2
L1CAM	Ex2
CDO1	Ex2
NRN1	Ex2
CHADL	Ex2
ADAMTSL4	Ex2
PDE6G	Ex2
GPX3	Ex2
ARSE	Ex2
RRP9	Ex2
CUTA	Ex2
TUBB	Ex2
FOXP4	Ex2
BAT2	Ex2
HMGA1	Ex2
PEX6	Ex2
MAMSTR	Ex2
EFS	Ex2
RAB34	Ex2
SEMA3B	Ex2
KIAA1045	Ex2
SCRN2	Ex2
HSD17B8	Ex2
WNK4	Ex2
PHYHD1	Ex2
AGPAT2	Ex2
TUBB4	Ex2
FAM69B	Ex2
FAM189A2	Ex2
CTSF	Ex2
PPM1M	Ex2
IL11RA	Ex2
PLXND1	Ex2
NYNRIN	Ex2
RNF123	Ex2
LAMB2	Ex2
AP2M1	Ex2
PTPN23	Ex2
EEFSEC	Ex2
SCAP	Ex2
IP6K1	Ex2
DVL3	Ex2
KRTAP5-2	Ex2
BOC	Ex2
OSBP2	Ex2
KCNE4	Ex2
SEMA6A	Ex2
GYG2	Ex2
FMOD	Ex2
ACOT11	Ex2
PYY	Ex2
MYOM1	Ex2
RASIP1	Ex2
PALMD	Ex2
HAS2	Ex2
FHL2	Ex2
PBX1	Ex2
FBXO40	Ex2
GNAO1	Ex2
C2orf89	Ex2
HSPB6	Ex2
EFEMP2	Ex2
PODN	Ex2
LOC728392	Ex2
PKNOX2	Ex2
HAAO	Ex2
C20orf26	Ex2
PRELP	Ex2
FBLN1	Ex2
F10	Ex2
FXYD1	Ex2
CMTM5	Ex2

## Sheet: Fig4C heatmap genes
Symbol	Clusters
CRIP2	C2
CRIP1	C2
C10orf116	C2
SUSD2	C2
PDLIM1	C2
THY1	C2
FOXS1	C2
COX4I2	C2
ACE	C2
A4GALT	C2
TCIRG1	C2
HM13	C2
ITGA5	C2
GRIN2D	C2
MGLL	C2
FOXL2	C2
HIC1	C2
FOXC1	C2
FGFR1	C2
JAG2	C2
COL18A1	C2
ELFN1	C2
AMN	C2
TTYH3	C2
LFNG	C2
VWCE	C2
NKPD1	C2
GBX2	C2
C1orf116	C2
OSR2	C2
TMEM119	C2
ADAMTS2	C2
LINGO1	C2
GDF11	C2
COTL1	C2
PLEKHG2	C2
NFATC4	C2
TMEM158	C2
SNX32	C2
PRG2	C2
FABP3	C2
COX7A1	C2
SSX5	C2
SSX3	C2
SSX6	C2
SSX4	C2
SSX1	C2
SLC29A4	C2
GLIS2	C2
FAM171A2	C2
FADS2	C2
RARRES2	C2
LGALS1	C2
SLC22A17	C2
ATP1B2	C2
ACHE	C2
REEP2	C2
C1QL1	C2
MGC12982	C2
FOXD2	C2
MMP2	C2
RPH3AL	C2
NCRNA00092	C2
FST	C2
CA12	C2
MORN3	C2
SULT1A2	C2
SULT1A1	C2
DHDPSL	C2
TLCD1	C2
FKBP10	C2
RCOR2	C2
TMEM200B	C2
SPON2	C2
AMZ1	C2
PTP4A3	C2
ADCK5	C2
DENND3	C2
KLHL38	C2
RASD2	C2
B3GNT7	C2
LRRC10B	C2
SPHK1	C2
GATA6	C2
MDGA1	C2
PTHLH	C2
SRCIN1	C2
PFKP	C2
PLCD4	C2
TRIM67	C2
CRHR1	C2
SYT5	C2
SLC45A3	C2
LAMB3	C2
TUBB3	C2
MC1R	C2
NCRNA00152	C2
LOC541471	C2
ECM1	C2
ISG20	C2
VGF	C2
ARC	C2
PTPRH	C2
CEBPD	C2
ITGB3	C2
HAP1	C2
NPNT	C2
HIGD1B	C2
SHISA2	C2
FOXD1	C2
GLI2	C2
AFAP1L2	C2
SLC16A8	C2
TRIL	C2
COL14A1	C2
SFXN3	C2
CALHM2	C2
S100A6	C2
TRPM4	C2
PHLDA2	C2
FKBP11	C2
BATF3	C2
NAAA	C2
DGKA	C2
BCL3	C2
S100A4	C2
S100A3	C2
TGFBI	C2
IL3RA	C2
TPPP	C2
AHNAK2	C2
PLEKHG6	C2
NLRP6	C2
ATHL1	C2
DLL4	C2
CHAC1	C2
HTRA3	C2
MYEOV	C2
KCNQ2	C2
GREB1L	C2
GALNTL4	C2
CARD11	C2
FIBCD1	C2
CDH24	C2
PADI1	C2
SLC9A3	C2
MRAP	C2
EPHA8	C2
ARHGDIG	C2
SCXB	C2
GJC1	C2
FJX1	C2
MMP11	C2
MATK	C2
LOC400931	C2
PTPLA	C2
PDIA2	C2
HSPB3	C2
ST3GAL1	C2
CSPG4	C2
MUC5B	C2
LOXL4	C2
HPN	C2
PCDHGB4	C2
RAMP1	C2
NOTUM	C2
PTGER1	C2
GJC2	C2
TMEM191A	C2
NTRK1	C2
EPHA4	C2
CAMK2A	C2
CABP7	C2
PRKCDBP	C2
FERMT3	C2
KLHL30	C2
CXXC5	C2
SLC17A9	C2
LOC284837	C2
PRCD	C2
CYGB	C2
SLC1A4	C2
C1orf95	C2
ITGA2B	C2
FAM101A	C2
EMILIN3	C2
XKR5	C2
GNG4	C2
TWIST2	C2
MDFI	C2
RTN4RL1	C2
CDH1	C2
CCDC140	C2
PRIMA1	C2
NHSL2	C2
MICALL2	C2
GRID1	C2
FMNL1	C2
CITED1	C2
KCTD17	C2
CLIP3	C2
MAP3K12	C2
CNTNAP1	C2
RGS11	C2
SEMA6D	C2
CCND2	C2
RIMBP3	C2
RIMBP3C	C2
P2RX6	C2
TMEM171	C2
TCHH	C2
SGSM2	C2
COL9A3	C2
PRKCA	C2
IGFBP7	C2
PPM1K	C2
HTR2B	C2
SIPA1L2	C2
KIT	C2
ADAM12	C2
GFRA2	C2
BASP1	C2
RHBDL3	C2
WWTR1	C2
FHDC1	C2
MAP2	C2
SEMA5A	C2
TSPAN5	C2
ADAM23	C2
INSC	C2
GALNT14	C2
SLIT1	C2
ACSBG1	C2
PIK3R3	C2
CTNND2	C2
RFPL2	C2
EMID1	C2
ACCN2	C2
NECAB2	C2
GPR19	C2
ADAM33	C2
GSG1L	C2
HES6	C2
CAMK1	C2
ADAM11	C2
ACACB	C2
WSCD1	C2
COMT	C2
FSTL4	C2
ADRA2B	C2
NCALD	C2
CORO2B	C2
MAL2	C2
KIF17	C2
PCK1	C2
GABRD	C2
TUBA8	C2
MGST2	C2
HSD11B2	C2
BAIAP2L2	C2
ODF3L1	C2
LHB	C2
NEURL1B	C2
COL5A3	C2
CDC25B	C2
DYSF	C2
MAPK12	C2
ADM2	C2
DUSP14	C2
RHOF	C2
FAM43B	C2
ANK1	C2
BTBD11	C2
LYPD6B	C2
SPOCD1	C2
G0S2	C2
CAMK1G	C2
VTN	C2
PYGM	C2
NPAS1	C2
NXPH4	C2
NDUFA4L2	C2
PLXNA4	C2
PLEKHB1	C2
GPC3	C2
C1QTNF2	C2
MRC2	C2
IGFBP2	C2
IGF2	C2
H19	C2
SLIT3	C2
RRAD	C2
MYH11	C2
CCL26	C2
COL5A1	C2
COL1A1	C2
MXRA5	C2
ELN	C2
CHST1	C2
APLNR	C2
OLFML2B	C2
NID1	C2
S1PR5	C2
COL4A2	C2
COL4A1	C2
ACAN	C2
PXDN	C2
GJA5	C2
AQP1	C2
FILIP1L	C2
CDH6	C2
THBS1	C2
VCAN	C2
FN1	C2
SERPINE1	C2
TNC	C2
NEFH	C2
CACNA1H	C2
TMEM132D	C2
SPARCL1	C2
ZNF280A	C2
FMN2	C2
TNFRSF4	C2
SIGLEC12	C2
TRPM2	C2
MMP9	C2
MMP1	C2
SDS	C2
CCL18	C2
ATP6V0D2	C2
CECR1	C2
LYZ	C2
LY9	C2
ADAMDEC1	C2
MMP25	C2
LST1	C2
ABI3	C2
P2RY6	C2
SIGLEC10	C2
CD300A	C2
HLA-DQB2	C2
HLA-DRB1	C2
HLA-DQA1	C2
HLA-DQB1	C2
HLA-DRB5	C2
SIGLEC8	C2
CD300LF	C2
APOC2	C2
CCL4L2	C2
CCL3	C2
PAEP	C2
ASIP	C2
LY96	C2
TRPV2	C2
GGTLC2	C2
GGT1	C2
GGT3P	C2
CSF2RA	C2
GPR172B	C2
WARS	C2
HPSE	C2
IL1R2	C2
C9orf110	C2
LAMA1	C2
ARMC9	C2
SFT2D2	C2
FOXF1	C2
NOV	C2
HSPB8	C2
PLAC8	C2
PATL2	C2
SAMSN1	C2
PTPRC	C2
ITGA4	C2
ST8SIA4	C2
PTPRE	C2
RGS18	C2
CXorf21	C2
MS4A7	C2
IL18	C2
FGL2	C2
LCP2	C2
GIMAP4	C2
BIN2	C2
IRF8	C2
PRDM1	C2
TRAF3IP3	C2
RHOH	C2
C16orf54	C2
RASSF5	C2
ARHGAP9	C2
TNF	C2
FAM26F	C2
CD38	C2
GBP1	C2
CXCL10	C2
CXCR2P1	C2
CXCL11	C2
UBD	C2
IDO1	C2
LOC400696	C2
ICOS	C2
CTLA4	C2
LOC400759	C2
AIM2	C2
STAT1	C2
APOL6	C2
BTN3A3	C2
HLA-DOB	C2
GPR18	C2
CRTAM	C2
BCL11B	C2
KLRK1	C2
ITK	C2
FASLG	C2
CD3G	C2
TIGIT	C2
GBP5	C2
CXCL9	C2
GBP4	C2
ZNF831	C2
CXCR6	C2
SKAP1	C2
GPR55	C2
SP140	C2
GBP2	C2
LAX1	C2
FCRL3	C2
CLEC12A	C2
TRAT1	C2
P2RY10	C2
THEMIS	C2
SH2D1A	C2
PTPN22	C2
CXCL13	C2
IKZF3	C2
FCGR3A	C2
ANKRD22	C2
FCGR1B	C2
FCGR1A	C2
FCGR1C	C2
CLEC9A	C2
ZC3H12D	C2
TARP	C2
GATA3	C2
EOMES	C2
HLA-H	C2
CD6	C2
PSMB8	C2
HLA-B	C2
HLA-F	C2
HLA-C	C2
NLRC5	C2
B2M	C2
HCP5	C2
HCG26	C2
FXYD2	C2
TBXAS1	C2
EBI3	C2
EMR1	C2
CD209	C2
CD163L1	C2
NPTX1	C2
CYSLTR2	C2
SLC16A6	C2
PLXDC2	C2
ABCC3	C2
GPR114	C2
NFATC2	C2
FAM49A	C2
NINJ2	C2
EPHB2	C2
PLXDC1	C2
ADAM19	C2
ELMO1	C2
AMIGO2	C2
MFSD2A	C2
GNGT2	C2
SSTR2	C2
RASGRP2	C2
SNX20	C2
GAB3	C2
TNFAIP2	C2
MYCN	C2
TM7SF4	C2
ITGAX	C2
DPYS	C2
SFTA1P	C2
TNFRSF18	C2
SLAMF1	C2
NR5A2	C2
TNFRSF8	C2
COL22A1	C2
LGALS2	C2
CD28	C2
RASGRP1	C2
JAKMIP1	C2
TOX	C2
CHI3L2	C2
TMEM155	C2
TAPBPL	C2
PSTPIP1	C2
TOX2	C2
AQP3	C2
MYO1G	C2
IRF5	C2
SLC7A7	C2
HCK	C2
C1S	C2
C1R	C2
SELL	C2
IL18BP	C2
HLA-DMA	C2
SECTM1	C2
TYMP	C2
IFI27	C2
ETV7	C2
KLHDC7B	C2
PDCD1	C2
IRF1	C2
SIRPG	C2
CD27	C2
TAP1	C2
LAG3	C2
PSMB9	C2
APOL3	C2
APOL1	C2
IL12RB1	C2
GRAP2	C2
KIAA0748	C2
IL21R	C2
LTA	C2
TIFAB	C2
C5orf20	C2
PTPRCAP	C2
ACAP1	C2
LTB	C2
S1PR4	C2
CD7	C2
XCL2	C2
IL15RA	C2
HLA-DRA	C2
HLA-DOA	C2
CIITA	C2
HLA-DPA1	C2
CD74	C2
HCLS1	C2
APOL4	C2
LCK	C2
CD247	C2
CD96	C2
TBC1D10C	C2
SLA2	C2
ZAP70	C2
CCR5	C2
SIT1	C2
CD8A	C2
CD3D	C2
CD2	C2
GZMK	C2
CD8B	C2
GZMA	C2
UBASH3A	C2
RASAL3	C2
PTPN7	C2
CYTIP	C2
CCL4	C2
FAM113B	C2
APBB1IP	C2
SLAMF6	C2
LCP1	C2
SPN	C2
IKZF1	C2
IL2RB	C2
LILRB2	C2
TNFAIP8L2	C2
GMFG	C2
SLAMF8	C2
CD52	C2
PARVG	C2
LAPTM5	C2
PRF1	C2
NKG7	C2
CST7	C2
CTSW	C2
IL32	C2
CCL5	C2
CXCR3	C2
CD3E	C2
ITGAL	C2
IL2RG	C2
BATF	C2
CORO1A	C2
CD5	C2
C1QC	C2
C1QB	C2
C1QA	C2
TNFRSF1B	C2
GZMH	C2
GZMB	C2
TBX21	C2
GPBAR1	C2
GNLY	C2
XAF1	C2
IFI44L	C2
EPSTI1	C2
RSAD2	C2
CMPK2	C2
OASL	C2
ISG15	C2
IFITM1	C2
CASP1	C2
CARD16	C2
RARRES3	C2
PYHIN1	C2
TNFSF9	C2
CD70	C2
APOBEC3H	C2
TRIM9	C2
RASGRF1	C2
B4GALNT4	C2
CFB	C2
C4A	C2
C2	C2
F5	C2
ANGPTL7	C2
TSPAN2	C2
PDE1A	C2
PPP1R1C	C2
MYB	C2
MAP4K1	C2
POU2AF1	C2
MEI1	C2
DERL3	C2
DPEP3	C2
IL6	C2
IL1B	C2
DKK1	C2
PRR16	C2
GREM1	C2
PLEKHO1	C2
ADAMTS14	C2
ENTHD1	C2
XIRP1	C2
RSPO3	C2
RUNX1	C2
COL12A1	C2
KLF4	C2
PGR	C2
YPEL4	C2
PHYHIP	C2
GPRC5A	C2
TNFRSF12A	C2
FOSL1	C2
AGT	C2
SLC2A3	C2
SLC2A14	C2
HES2	C2
ANGPTL4	C2
SFN	C2
C21orf121	C2
MGC16025	C2
ARX	C2
ULBP1	C2
PPP1R14C	C2
MUC12	C2
BARX1	C2
SYCE1	C2
MAPK10	C2
BRSK1	C2
KCNMB4	C2
SCD5	C2
TNIK	C2
CGNL1	C2
DOK5	C2
ADRA2A	C2
TSPYL5	C2
SLC38A5	C2
PCDH10	C2
CYP24A1	C2
AKR1C3	C2
SCG5	C2
DIRAS2	C2
FRMD5	C2
EGF	C2
CLDN3	C2
TMEM178	C2
ODZ4	C2
RASL11B	C2
AK5	C2
PKIA	C2
DNAJC12	C2
TSTD1	C2
FLJ16779	C2
SORL1	C2
ATP1B1	C2
FOLH1	C2
HS3ST1	C2
CPNE5	C2
SEL1L3	C2
RAB31	C2
TSC22D1	C2
LAYN	C2
SETBP1	C2
GPC4	C2
GLIS3	C2
SDC2	C2
GEM	C2
CADM1	C2
ADCY1	C2
RIMS2	C2
B4GALNT1	C2
ST8SIA1	C2
BCAT1	C2
PPAP2B	C2
LRRTM2	C2
CELF2	C2
SLC8A1	C2
FLI1	C2
FAM105A	C2
PRR5L	C2
SERPINB8	C2
PARP8	C2
CCDC19	C2
PALM3	C2
NOVA1	C2
FGF12	C2
UCHL1	C2
SCN4B	C2
SLC2A10	C2
C16orf45	C2
SCRG1	C2
PXDNL	C2
SOX11	C2
SCHIP1	C2
MYO5B	C2
TRPC3	C2
B3GALT2	C2
SLC26A10	C2
ODZ1	C2
DOK6	C2
ROR1	C2
KIAA0802	C2
ZFPM2	C2
NHS	C2
FLJ42709	C2
SYT2	C2
GAD1	C2
PRRT2	C2
TRIM36	C2
SLC6A1	C2
SLC4A8	C2
PRDM8	C2
SYT11	C2
LPPR4	C2
CERKL	C2
LGALS3	C2
GADD45G	C2
DPP4	C2
LOC647121	C2
ENPP4	C2
STK33	C2
AGXT2L1	C2
CCDC109B	C2
C2CD2	C2
SCCPDH	C2
MANBA	C2
PTPN13	C2
MAP9	C2
FZD7	C2
ACSL1	C2
SEMA3E	C2
FRY	C2
COBL	C2
ME1	C2
ACSL6	C2
JAG1	C2
KAL1	C2
CPE	C2
IGSF21	C2
CACNA2D4	C2
FSCN2	C2
PPP1R1A	C2
MOXD1	C2
PACSIN1	C2
NDRG4	C2
CRYM	C2
AQP4	C2
PPP2R2B	C2
CHN2	C2
PTPRD	C2
MAP1B	C2
DDAH1	C2
DPYSL3	C2
OPCML	C2
CHN1	C2
SPON1	C2
PTN	C2
SUSD4	C2
KIF5C	C2
RNF182	C2
CDH2	C2
MEGF11	C2
SPOCK1	C2
NCAM1	C2
KDR	C2
EGFLAM	C2
MGAT3	C2
PCSK5	C2
KLHL14	C2
TTBK1	C2
HS3ST3A1	C2
GABBR2	C2
C14orf162	C2
UNC5A	C2
2021-03-04	C2
MLC1	C2
DARC	C2
CEND1	C2
C12orf68	C2
C20orf103	C2
CPT1C	C2
KIRREL3	C2
ECEL1	C2
SRRM4	C2
ATCAY	C2
PTPRN	C2
NTNG2	C2
ABCG4	C2
RDH12	C2
LRRN3	C2
BAALC	C2
TNFRSF11B	C2
EYA4	C2
SNCAIP	C2
PTGS2	C2
KIAA1462	C2
FOXL1	C2
MSX1	C2
PHOSPHO1	C2
PDLIM4	C2
NTRK3	C2
NTN1	C2
SMOC2	C2
RFTN1	C2
PRRX1	C2
GPC6	C2
SLC38A3	C2
GPR162	C2
KCNJ4	C2
SEC14L2	C2
ITPKA	C2
WBSCR17	C2
KCNJ11	C2
SLC27A2	C2
NELL2	C2
ROR2	C2
BMP7	C2
CDH23	C2
ATP1A2	C2
PLCE1	C2
FRZB	C2
LEFTY2	C2
COL9A2	C2
PGM5	C2
GLDC	C2
PRDM16	C2
FLJ42875	C2
SH3GL2	C2
GALNT13	C2
RGS7	C2
PMP2	C2
CATSPER3	C2
C8G	C2
ADARB2	C2
FAM20A	C2
BLK	C2
FAM179A	C2
ALDH1A2	C2
NKAPL	C2
KIAA1199	C2
ATP10B	C2
FNDC1	C2
C4orf7	C2
PENK	C2
DLX1	C2
CXCR4	C2
CNIH3	C2
PTGER4	C2
PLN	C2
TDH	C2
SLFN11	C2
DOCK10	C2
FRMD4A	C2
ATP8B2	C2
KRT36	C2
ARHGAP24	C2
LGR6	C2
KIF26A	C2
HCN2	C2
CPLX1	C2
COL20A1	C2
PTGS1	C2
CDKN1A	C2
PTPRU	C2
NT5E	C2
C13orf29	C2
INPP5J	C2
MRGPRE	C2
VSTM2L	C2
CD79B	C2
GDF15	C2
POMC	C2
TACC2	C2
SLC38A8	C2
LRRC52	C2
ITIH5L	C2
TRPV4	C2
S100A1	C2
RHBDL2	C2
CABYR	C2
F12	C2
EEF1A2	C2
NQO1	C2
DHRS7B	C2
LOC100134229	C2
RAB15	C2
ASB9	C2
CLCNKB	C2
ARHGEF16	C2
STEAP3	C2
OLFM1	C2
CYTSB	C2
PANX2	C2
P4HA2	C2
SDK2	C2
SLC6A3	C2
FFAR3	C2
FFAR2	C2
RAC2	C2
IL27RA	C2
GPR56	C2
B4GALNT3	C2
TMEM173	C2
ASTN2	C2
CHST8	C2
ONECUT1	C2
MOCOS	C2
PGM1	C2
ITPR2	C2
FGFR2	C2
GTF2H2B	C2
P4HA1	C2
ALG5	C2
MRPS28	C2
FAM49B	C2
HRSP12	C2
TMEM70	C2
MRPL13	C2
FAM82B	C2
COPS5	C2
TCEB1	C2
CHD7	C2
ASAP1	C2
JPH1	C2
STOM	C2
CCRN4L	C2
SOCS2	C2
SQLE	C2
FABP5	C2
UGT8	C2
GCNT4	C2
PRLR	C2
LOC100101938	C2
BHLHA15	C2
LYN	C2
BAG2	C2
MMP16	C2
SEC24D	C2
LRP8	C2
THBS2	C2
CD109	C2
ATP8B1	C2
TNFRSF21	C2
MYOF	C2
TRIB1	C2
CLCNKA	C2
SH2D5	C2
GRIN2A	C2
OR51E1	C2
GRM8	C2
KCNJ8	C2
ABCC9	C2
HECW2	C2
ADAMTS9	C2
ADAMTS4	C2
TNFAIP6	C2
LOC728264	C2
PCDH17	C2
ADAMTS5	C2
LONRF3	C2
STC2	C2
LIF	C2
SLC7A11	C2
ESM1	C2
ANGPT2	C2
TFCP2L1	C2
SRD5A3	C2
ENO3	C2
LIPG	C2
CDC6	C2
CDC25C	C2
MKI67	C2
KIF18B	C2
EPR1	C2
KIF20A	C2
ANLN	C2
NUSAP1	C2
CCNB2	C2
NCAPH	C2
SPC25	C2
RRM2	C2
HJURP	C2
CENPA	C2
FAM72B	C2
FAM72A	C2
E2F8	C2
NETO2	C2
CDCA7	C2
KIF14	C2
FAM111B	C2
NCAPG	C2
HMMR	C2
CCNE2	C2
ATAD2	C2
NUF2	C2
KIF18A	C2
MLF1IP	C2
NDC80	C2
ASPM	C2
NEK2	C2
BUB1	C2
TOP2A	C2
MCM10	C2
DLGAP5	C2
DEPDC1	C2
NEIL3	C2
CKS2	C2
DEPDC1B	C2
SIX4	C2
PI15	C2
TWIST1	C2
LDB3	C2
CCDC36	C2
CLSPN	C2
ATP8A2	C2
VWC2	C2
SLC7A3	C2
TNFAIP8L3	C2
SH3RF2	C2
DOK7	C2
NTF3	C2
CCKBR	C2
LGI2	C2
FAM163A	C2
ST8SIA2	C2
GLT25D2	C2
VAX1	C2
SYNPO2L	C2
GUCY1A2	C2
PCSK1	C2
CNTNAP5	C2
OLIG2	C2
OLIG1	C2
UNC5D	C2
KCNK1	C2
PLCXD3	C2
KCNK9	C2
DLGAP1	C2
ADD2	C2
WDR72	C2
CHRNA5	C2
PRDM6	C2
GPR63	C2
CA8	C2
BAI1	C2
ATP8B3	C2
SCG3	C2
OSBPL6	C2
KCTD8	C2
FAM196A	C2
ZNF536	C2
GREM2	C2
LPAR1	C2
GJA1	C2
VAV2	C2
BMPR1B	C2
RUNX1T1	C2
PAPSS2	C2
PAM	C2
PLCL2	C2
CXorf65	C2
GABRB3	C2
GABRA5	C2
DLL1	C2
PPM1E	C2
HS6ST2	C2
SPRYD5	C2
MAT1A	C2
TRPM8	C2
CNTF	C2
ABCC2	C2
NOX5	C2
ANO9	C2
SMPDL3B	C2
ELOVL7	C2
KCNN4	C2
TFPI2	C2
TCN1	C2
GFRA1	C2
PTPRR	C2
HTN1	C2
GOLT1A	C2
SYK	C2
ALK	C2
C14orf50	C2
TNFRSF10D	C2
CYFIP2	C2
SPATA18	C2
C6orf138	C2
TNFRSF10C	C2
PCDHGA12	C2
FAM134B	C2
ANKRD30B	C2
MST4	C2
FAM81A	C2
CNR1	C2
GRIP1	C2
WNT3	C2
TICAM2	C2
KATNAL2	C2
ANKDD1A	C2
SLC39A8	C2
EPHA5	C2
ENOX1	C2
TNFRSF19	C2
SLCO5A1	C2
DKFZp686O24166	C2
SNTB1	C2
KHDRBS3	C2
POLA1	C2
ZAK	C2
COCH	C2
AUTS2	C2
CORO6	C2
ABCB4	C2
FKBP5	C2
DMC1	C2
RBM24	C2
IRX1	C2
PPEF1	C2
ANO4	C2
MDGA2	C2
ALDH1L2	C2
RAPGEF4	C2
SMAD9	C2
CACNA2D1	C2
GLCCI1	C2
FAM171B	C2
CACNB4	C2
GPR137C	C2
DNM3	C2
DZIP1	C2
CHST9	C2
RGS1	C2
ITGB8	C2
CD9	C2
EGR3	C2
EGR2	C2
FOS	C2
DUSP5	C2
CCDC64	C2
VDR	C2
RASSF2	C2
TPD52	C2
HTATIP2	C2
SLC17A5	C2
MGST1	C2
FLRT2	C2
ESR1	C2
IFI16	C2
ACSS3	C2
LOC284749	C2
CCNO	C2
AGPAT4	C2
EPDR1	C2
SORCS1	C2
PLA2R1	C2
SGK1	C2
PPFIBP1	C2
FGF13	C2
MR1	C2
HIST2H2BF	C2
TNFRSF11A	C2
GPR176	C2
LOC388692	C2
DIAPH2	C2
ALCAM	C2
PVRL3	C2
PROS1	C2
FRMD4B	C2
ABCC4	C2
GPM6B	C2
RNF125	C2
ITGA6	C2
MAN2A1	C2
IQGAP1	C2
ANO6	C2
PCBD2	C2
GABRE	C2
RANBP17	C2
ARHGAP18	C2
OSBPL3	C2
MAP3K8	C2
KIAA1383	C2
SPATA9	C2
TTL	C2
EZH2	C2
SACS	C2
C12orf24	C2
PIWIL4	C2
POLE2	C2
DEPDC7	C2
MIR155HG	C2
FLJ40330	C2
APITD1	C2
AK3L1	C2
PDK1	C2
ERAP2	C2
RUNX2	C2
F2R	C2
MS4A14	C2
ANXA1	C2
LRMP	C2
EMB	C2
GBP3	C2
GPR126	C2
GIMAP7	C2
EVI2A	C2
TFEC	C2
IGSF6	C2
TNFSF10	C2
ADAM28	C2
IPCEF1	C2
IL15	C2
TNFSF13B	C2
CD69	C2
GFI1	C2
CLIC2	C2
PIK3AP1	C2
BIRC3	C2
TNFAIP8	C2
STK17B	C2
AKAP5	C2
ARHGAP6	C2
DDX60	C2
C6orf150	C2
ABCD2	C2
HSPA4L	C2
CA13	C2
RRM2B	C2
AP1S3	C2
PHTF1	C2
SFXN1	C2
UBE2V2	C2
TMEM68	C2
TGS1	C2
ARFGEF1	C2
KIAA0146	C2
IMPA1	C2
PSME4	C2
ABHD3	C2
HOMER1	C2
AMMECR1	C2
SGMS1	C2
LCORL	C2
TRPC6	C2
ZEB1	C2
DOCK4	C2
GUCY1B3	C2
ARHGAP29	C2
EDIL3	C2
CA2	C2
RHOU	C2
ITGA2	C2
MPZL2	C2
MYO5C	C2
EFCAB5	C2
SYNJ2	C2
ABCC12	C2
SYNE2	C2
ESR2	C2
CARD14	C2
SNX25	C2
LRP2BP	C2
ACRC	C2
GLMN	C2
CD58	C2
SMARCA5	C2
PIK3C2A	C2
LMBRD2	C2
MPHOSPH9	C2
ATM	C2
LRRCC1	C2
CEP135	C2
WSB1	C2
AHSA2	C2
CENPE	C2
ALS2CR12	C2
NIPAL2	C2
IDE	C2
C8orf37	C2
TCF12	C2
TAF2	C2
RNF19A	C2
TTC35	C2
MTDH	C2
MTBP	C2
ABCB10	C2
RAD54B	C2
E2F5	C2
MPP6	C2
ZNF467	C2
SFXN5	C2
HTRA1	C2
SPARC	C2
LRRC4	C2
MAP1A	C2
ISM1	C2
ADCY2	C2
KDELR3	C2
ANPEP	C2
SLCO3A1	C2
LHFP	C2
MAPT	C2
GREB1	C2
BDKRB2	C2
ASS1	C2
SLC16A2	C2
RPS6KA2	C2
LOC283070	C2
CAMK1D	C2
C12orf75	C2
C17orf76	C2
PBX3	C2
FEZ1	C2
SLITRK2	C2
SCN1B	C2
FBXL7	C2
SULF2	C2
BAI2	C2
MAN1C1	C2
SGSM1	C2
MALL	C2
SYTL4	C2
C10orf72	C2
P4HA3	C2
SLC47A1	C2
PLEKHG4B	C2
FAM70A	C2
SAP30	C2
FADS1	C2
CACNB1	C2
ANKRD34A	C2
CRABP2	C2
CCDC74A	C2
BST1	C2
PHACTR3	C2
KCNE1	C2
LAT	C2
CD48	C2
LHFPL3	C2
GJA3	C2
WNT10B	C2
NKX6-1	C2
TBX18	C2
POU3F3	C2
HOXA13	C2
TBX3	C2
MEIS2	C2
EBF3	C2
LCTL	C2
CPVL	C2
EFCAB4B	C2
KCND3	C2
FMN1	C2
NKX2-4	C2
NIPAL4	C2
CLDN4	C2
CILP	C2
SGCD	C2
DNAJC13	C2
INPP4B	C2
IQGAP2	C2
FAM23A	C2
PAG1	C2
CHSY3	C2
NSMCE4A	C2
DNAJC3	C2
RECQL	C2
RDX	C2
SOAT1	C2
CDYL2	C2
RAB2A	C2
PRKDC	C2
KIAA0196	C2
ZNF704	C2
ANKRD44	C2
TMED7-TICAM2	C2
STAB2	C2
NT5DC3	C2
SSPO	C2
ENPEP	C2
EDNRA	C2
SGCB	C2
DOCK11	C2
SLC22A4	C2
SLC38A6	C2
FAM173B	C2
SPAG1	C2
SLC1A1	C2
REEP1	C2
PSD2	C2
NEXN	C2
TLL2	C2
PTPLAD2	C2
SEC14L5	C1
ELFN2	C1
ALG1L	C1
SPINT1	C1
CDC42BPG	C1
MYH14	C1
HILS1	C1
RAPGEF3	C1
IGHMBP2	C1
JUP	C1
MFAP2	C1
GPR153	C1
ZDHHC19	C1
CNN2	C1
C1orf170	C1
CD82	C1
C1orf190	C1
ADPRH	C1
MMACHC	C1
EXTL1	C1
PLA1A	C1
LDHD	C1
IGLL3	C1
RTN2	C1
ANKRD53	C1
ECE2	C1
GSTP1	C1
ACOT11	C1
RASIP1	C1
C1QL4	C1
GSTT1	C1
IGFBPL1	C1
FAM184B	C1
SYBU	C1
OTUD7A	C1
PRRT4	C1
GIPC3	C1
AVPR2	C1
ADRA2C	C1
PCOLCE2	C1
CAND2	C1
CASKIN1	C1
LDHC	C1
L1CAM	C1
KLF14	C1
PIM1	C1
HS3ST5	C1
HIST1H2AC	C1
C6orf41	C1
ZNF773	C1
ZNF549	C1
ZNF749	C1
SNAI2	C1
NCKAP5	C1
EDNRB	C1
SMARCC1	C1
GPD1L	C1
STEAP1	C1
KCNK2	C1
DLC1	C1
C6orf142	C1
CA4	C1
SYNPR	C1
ID2	C1
TDRD10	C1
SHE	C1
RADIL	C1
MSC	C1
PDK4	C1
TPTE2P3	C1
FBP2	C1
TMEM146	C1
ASPG	C1
ALDH1L1	C1
PLIN5	C1
SIK1	C1
PBX1	C1
GNAO1	C1
C2orf89	C1
VIPR2	C1
LOC154822	C1
LTBP1	C1
LOC100302650	C1
CPS1	C1
C4orf12	C1
MPZ	C1
ERBB3	C1
GJC3	C1
C10orf2	C1
WDR6	C1
LOC282997	C1
LOC100188947	C1
LOC100127888	C1
RPS12	C1
CDCA7L	C1
SNHG7	C1
NCRNA00219	C1
VIM	C1
RAB11FIP1	C1
FDFT1	C1
EPHX2	C1
FAM86B2	C1
FAM86B1	C1
TMEM25	C1
TAS1R1	C1
LOC441869	C1
ATAD3C	C1
TMEM45A	C1
TSPAN8	C1
FXYD1	C1
PON3	C1
MYOM1	C1
CAPN9	C1
HPSE2	C1
CST1	C1
LRRC56	C1
EPS8L2	C1
ADAMTSL4	C1
STAR	C1
RNF122	C1
KIF25	C1
MGC16275	C1
C1orf229	C1
TFF3	C1
RYR1	C1
OVOL1	C1
TFAP2A	C1
GATA4	C1
UPK2	C1
KCNG2	C1
SOSTDC1	C1
ADRB2	C1
CYP27C1	C1
CDO1	C1
LOC340357	C1
ZNF185	C1
ACCSL	C1
ROBO3	C1
LOC151174	C1
WBSCR27	C1
RAMP2	C1
C3orf54	C1
APOE	C1
KLHL35	C1
TNNI3	C1
LOC440356	C1
TNK2	C1
H1FX	C1
ZBTB47	C1
PALM	C1
TUBB4	C1
FAM69B	C1
PHYHD1	C1
NPB	C1
DALRD3	C1
ABHD14B	C1
APOM	C1
SILV	C1
C6orf226	C1
USP19	C1
IP6K1	C1
DVL3	C1
PTPN23	C1
EEFSEC	C1
SCAP	C1
LAMB2	C1
MTMR14	C1
LIMS2	C1
SEMA3B	C1
IFT122	C1
EFS	C1
GPR62	C1
MANEAL	C1
C16orf86	C1
RNF208	C1
FAM127C	C1
CLEC11A	C1
MAMSTR	C1
LOC388588	C1
RAB34	C1
CITED4	C1
SOX15	C1
CMTM5	C1
ATP6V1G2	C1
WDR86	C1
PCDHB3	C1
PCDHB12	C1
DPP10	C1
PCDHB9	C1
PCDHB16	C1
PCDHB10	C1
PCDHB2	C1
PCDHA7	C1
PCDHA3	C1
PCDHA2	C1
PCDHB5	C1
KRTAP5-1	C1
ACCN3	C1
TCP10L	C1
ZNF540	C1
ZNF454	C1
ZNF883	C1
ZNF229	C1
ZNF285	C1
ZNF560	C1
ZNF208	C1
ZNF676	C1
ZNF610	C1
LTB4R	C1
ZNF836	C1
ZNF677	C1
PCDHA10	C1
DNAH2	C1
EPPK1	C1
HYAL1	C1
HSD17B1	C1
SLC28A1	C1
MYO7B	C1
GPR17	C1
WISP2	C1
BCAS4	C1
MAG	C1
CD22	C1
ZNF541	C1
CCL28	C1
FAM178B	C1
SH3D19	C1
RNF144B	C1
ARSH	C1
PDE4B	C1
COL11A1	C1
COL11A2	C1
IRS4	C1
BCL11A	C1
SOBP	C1
AMOTL2	C1
FAM75A5	C1
FAM75A2	C1
FAM75A3	C1
PRKCD	C1
HYAL2	C1
RAB43	C1
DUSP7	C1
MCM2	C1
GTF2H4	C1
LRRC33	C1
DLL3	C1
TMPPE	C1
GPR156	C1
ZBTB12	C1
HSPA1L	C1
C6orf134	C1
ADPRHL1	C1
WIPF3	C1
UGT3A2	C1
APOBEC2	C1
ACOX2	C1
PCDHB8	C1
PCDHB13	C1
PCDHB18	C1
PCDHB15	C1
SCIN	C1
MME	C1
ZSCAN12P1	C1
ZNF578	C1
NEDD9	C1
MATN2	C1
GFRA3	C1
ART3	C1
EGFL8	C1
CHADL	C1
FAM132A	C1
FHL2	C1
MST1	C1
LOC100271722	C1
ZNF532	C1
ROBO1	C1
ARHGAP28	C1
ZNF311	C1
SLC25A21	C1
KDELC1	C1
ZFP82	C1
BFSP1	C1
TRAIP	C1
CECR4	C1
PALMD	C1
LOC100190938	C1
TSGA10IP	C1
PLA2G1B	C1
TMPRSS5	C1
SEMA3C	C1
PAK3	C1
CAMK4	C1
GPR37	C1
FBXO40	C1
FERMT1	C1
MCF2	C1
ASB14	C1
GALNTL6	C1
C10orf107	C1
ATP4B	C1
HCN1	C1
ERBB4	C1
STEAP2	C1
ESRRG	C1
MAOA	C1
ANKRD43	C1
LRRC48	C1
KIAA1045	C1
SPAG8	C1
CHRNB2	C1
CELF5	C1
ZNF853	C1
PPM1M	C1
NYNRIN	C1
LOC100125556	C1
LOC100009676	C1
HEMK1	C1
KLF15	C1
XYLB	C1
SLC19A3	C1
CECR7	C1
PCDHB7	C1
DAPL1	C1
PCDHB6	C1
PODN	C1
BOC	C1
DCT	C1
C7orf58	C1
EDN3	C1
BMP3	C1
SLC14A1	C1
CHGB	C1
AP3B2	C1
KIAA1543	C1
ABCA3	C1
SLC29A2	C1
C1orf201	C1
ABHD8	C1
NCRNA00087	C1
NCRNA00086	C1
MPL	C1
AKAP3	C1
OSBP2	C1
ASRGL1	C1
MAP1LC3C	C1
GPR61	C1
CYP46A1	C1
TMEM151A	C1
C19orf77	C1
MAST1	C1
CELSR3	C1
STX1B	C1
PCBP4	C1
CCDC13	C1
LGI4	C1
FXYD3	C1
SCRN1	C1
DNALI1	C1
SYN2	C1
KCNA5	C1
GRIK3	C1
BEX1	C1
ZDHHC8P1	C1
ZC4H2	C1
ZC3H12B	C1
YJEFN3	C1
TMSB15B	C1
ME3	C1
PACRG	C1
C1orf88	C1
IRF6	C1
AGBL4	C1
RNASE4	C1
ANG	C1
CGN	C1
LYPD3	C1
NFIA	C1
BEND5	C1
TESK2	C1
KIAA1274	C1
HPDL	C1
CTHRC1	C1
MRAP2	C1
JPH4	C1
FLJ22536	C1
COL24A1	C1
HAS2	C1
C20orf26	C1
PRUNE2	C1
OXER1	C1
HAAO	C1
RBP4	C1
EFEMP2	C1
WNT6	C1
PCBP3	C1
TGFB1I1	C1
ATP4A	C1
DPP6	C1
RHCG	C1
DUSP15	C1
KIF7	C1
DKKL1	C1
C12orf69	C1
C10orf67	C1
LRRN1	C1
KCNE4	C1
DUOXA1	C1
DUOX2	C1
DUOX1	C1
S100B	C1
NRP2	C1
DLX3	C1
GABRP	C1
CPA2	C1
NLRP9	C1
HCG4	C1
KAAG1	C1
SOX9	C1
PKLR	C1
ICAM4	C1
C15orf51	C1
PMP22	C1
ENPP1	C1
GXYLT2	C1
NTNG1	C1
MOSC2	C1
PRSS27	C1
DYNLRB2	C1
GSTT2	C1
PERP	C1
EXPH5	C1
SCAND3	C1
ZDHHC2	C1
SNCA	C1
C6orf155	C1
TES	C1
CADPS2	C1
FAM24B	C1
CUZD1	C1
SPP1	C1
FAP	C1
PDGFD	C1
MPPED2	C1
LINGO2	C1
KREMEN2	C1
SLC3A1	C1
PPARG	C1
COX6A2	C1
HHATL	C1
OR2A9P	C1
ARHGEF35	C1
NDRG2	C1
DPYSL2	C1
FAM196B	C1
COBLL1	C1
PCDHAC2	C1
PCDHAC1	C1
PCDHA12	C1
PCDHA11	C1
WFDC2	C1
CCDC80	C1
GLT1D1	C1
NUDT10	C1
FAM123A	C1
TMEM215	C1
LOC148709	C1
C9orf171	C1
SPEF1	C1
?	C1
ProSAPiP1	C1
LOC339674	C1
CCDC108	C1
DNAI1	C1
SNAP25	C1
PSD	C1
SLC6A11	C1
PCDHA6	C1
C1orf114	C1
C14orf64	C1
C10orf25	C1
FKBP1B	C1
NTRK2	C1
NCAM2	C1
MBL1P	C1
TRPM1	C1
MID1	C1
BCHE	C1
IL17RD	C1
LMO3	C1
LRAT	C1
TMEM44	C1
EFNB3	C1
TRIB2	C1
KLK13	C1
C4orf19	C1
ROPN1	C1
ROPN1B	C1
RNF43	C1
C6orf218	C1
KIF6	C1
ENDOU	C1
C2orf77	C1
C10orf79	C1
SPAG16	C1
C17orf100	C1
HPGD	C1
HCN3	C1
ZSCAN1	C1
ZNF835	C1
LOC401052	C1
TTC21A	C1
C7orf10	C1
C3orf32	C1
ZSCAN18	C1
ZNF135	C1
ANO8	C1
ZBTB20	C1
PLEKHG4	C1
LOC80054	C1
LOC100270746	C1
FAM181B	C1
LEKR1	C1
C3orf71	C1
SCN8A	C1
PAIP2B	C1
MLF1	C1
C3orf14	C1
FBXO15	C1
ZDHHC15	C1
NAP1L2	C1
BEX5	C1
SLC35F2	C1
FBXO16	C1
DDX25	C1
CLCN2	C1
SHANK2	C1
FAM135B	C1
CKMT1B	C1
CKMT1A	C1
MEIS1	C1
MAGEL2	C1
NDN	C1
ZFR2	C1
DLGAP3	C1
SYT3	C1
RIMS4	C1
TPRXL	C1
C7orf13	C1
C1orf59	C1
SRGAP3	C1
SLC6A6	C1
ARAP3	C1
VWA5A	C1
MANSC1	C1
ANKRD5	C1
PLIN2	C1
ABHD6	C1
NCRNA00181	C1
A1BG	C1
ZNF497	C1
RGL3	C1
HOMER2	C1
[truncated: 345 more rows]

## Sheet: Fig5A pathway genes
Pathway	Symbol	RANK.IN.GENE.LIST	RANK.METRIC.SCORE	RUNNING.ES
IL6_JAK_STAT3_SIGNALING	LTB	12935	-0.196372	-0.538162
IL6_JAK_STAT3_SIGNALING	GRB2	12985	-0.199725	-0.528598
IL6_JAK_STAT3_SIGNALING	CXCL13	13008	-0.201787	-0.51723
IL6_JAK_STAT3_SIGNALING	IL1R2	13138	-0.21226	-0.511834
IL6_JAK_STAT3_SIGNALING	PTPN1	13166	-0.214921	-0.499947
IL6_JAK_STAT3_SIGNALING	PIK3R5	13326	-0.227433	-0.495454
IL6_JAK_STAT3_SIGNALING	TLR2	13335	-0.229045	-0.481497
IL6_JAK_STAT3_SIGNALING	SOCS1	13529	-0.248616	-0.477775
IL6_JAK_STAT3_SIGNALING	CNTFR	13531	-0.249004	-0.462126
IL6_JAK_STAT3_SIGNALING	CXCL10	13631	-0.257176	-0.452036
IL6_JAK_STAT3_SIGNALING	IL7	13676	-0.261803	-0.438245
IL6_JAK_STAT3_SIGNALING	ITGB3	13699	-0.263856	-0.42296
IL6_JAK_STAT3_SIGNALING	CCR1	13777	-0.272205	-0.410558
IL6_JAK_STAT3_SIGNALING	SOCS3	13859	-0.281468	-0.39782
IL6_JAK_STAT3_SIGNALING	ITGA4	13965	-0.291831	-0.385916
IL6_JAK_STAT3_SIGNALING	STAT1	14280	-0.325857	-0.384822
IL6_JAK_STAT3_SIGNALING	IL2RA	14403	-0.340667	-0.37089
IL6_JAK_STAT3_SIGNALING	CD14	14441	-0.345794	-0.351365
IL6_JAK_STAT3_SIGNALING	IL17RA	14459	-0.348973	-0.330399
IL6_JAK_STAT3_SIGNALING	HMOX1	14630	-0.369682	-0.317613
IL6_JAK_STAT3_SIGNALING	CSF3R	14684	-0.377876	-0.297055
IL6_JAK_STAT3_SIGNALING	TNF	14817	-0.394939	-0.280319
IL6_JAK_STAT3_SIGNALING	EBI3	14883	-0.404794	-0.258807
IL6_JAK_STAT3_SIGNALING	IL1B	14917	-0.40989	-0.23499
IL6_JAK_STAT3_SIGNALING	IL15RA	14981	-0.418885	-0.212465
IL6_JAK_STAT3_SIGNALING	OSMR	15086	-0.436335	-0.191381
IL6_JAK_STAT3_SIGNALING	CSF2RB	15166	-0.449862	-0.167893
IL6_JAK_STAT3_SIGNALING	TNFRSF1A	15371	-0.489566	-0.14965
IL6_JAK_STAT3_SIGNALING	STAT3	15430	-0.503492	-0.121476
IL6_JAK_STAT3_SIGNALING	TNFRSF1B	15467	-0.512264	-0.0913853
IL6_JAK_STAT3_SIGNALING	IFNAR1	15492	-0.518361	-0.0601657
IL6_JAK_STAT3_SIGNALING	IRF1	15504	-0.520006	-0.0280364
IL6_JAK_STAT3_SIGNALING	TNFRSF21	15629	-0.556365	-0.000618477
IL6_JAK_STAT3_SIGNALING	MAP3K8	15694	-0.574763	0.03168
ALLOGRAFT_REJECTION	IRF4	12854	-0.189913	-0.440837
ALLOGRAFT_REJECTION	CRTAM	12902	-0.194234	-0.439813
ALLOGRAFT_REJECTION	LTB	12935	-0.196372	-0.43781
ALLOGRAFT_REJECTION	CD1D	12952	-0.197187	-0.434792
ALLOGRAFT_REJECTION	CXCL13	13008	-0.201787	-0.434113
ALLOGRAFT_REJECTION	IL2RB	13020	-0.202583	-0.430674
ALLOGRAFT_REJECTION	EIF3A	13059	-0.206204	-0.428845
ALLOGRAFT_REJECTION	FASLG	13086	-0.207912	-0.426233
ALLOGRAFT_REJECTION	GALNT1	13093	-0.208481	-0.422362
ALLOGRAFT_REJECTION	NCF4	13172	-0.215583	-0.422836
ALLOGRAFT_REJECTION	CD86	13175	-0.215637	-0.41857
ALLOGRAFT_REJECTION	CD3E	13193	-0.217092	-0.41521
ALLOGRAFT_REJECTION	HLA-DQA1	13207	-0.217813	-0.411585
ALLOGRAFT_REJECTION	CCL13	13239	-0.220125	-0.409036
ALLOGRAFT_REJECTION	ICAM1	13280	-0.224038	-0.406969
ALLOGRAFT_REJECTION	TLR2	13335	-0.229045	-0.405672
ALLOGRAFT_REJECTION	HLA-DMA	13415	-0.237129	-0.40577
ALLOGRAFT_REJECTION	LY86	13431	-0.238612	-0.401847
ALLOGRAFT_REJECTION	CD79A	13524	-0.248396	-0.402526
ALLOGRAFT_REJECTION	SOCS1	13529	-0.248616	-0.397713
ALLOGRAFT_REJECTION	HLA-DMB	13614	-0.255185	-0.397756
ALLOGRAFT_REJECTION	IL7	13676	-0.261803	-0.396229
ALLOGRAFT_REJECTION	GZMB	13709	-0.265031	-0.392828
ALLOGRAFT_REJECTION	CCR5	13766	-0.271308	-0.390795
ALLOGRAFT_REJECTION	CCR1	13777	-0.272205	-0.385876
ALLOGRAFT_REJECTION	PTPN6	13783	-0.272597	-0.380637
ALLOGRAFT_REJECTION	CD96	13792	-0.273845	-0.37556
ALLOGRAFT_REJECTION	IL10	13829	-0.278678	-0.37213
ALLOGRAFT_REJECTION	CD8B	13840	-0.279631	-0.36706
ALLOGRAFT_REJECTION	MMP9	13855	-0.281024	-0.36221
ALLOGRAFT_REJECTION	NOS2	13879	-0.283473	-0.357872
ALLOGRAFT_REJECTION	GZMA	13895	-0.285313	-0.352998
ALLOGRAFT_REJECTION	MAP4K1	13957	-0.291373	-0.350869
ALLOGRAFT_REJECTION	IGSF6	14010	-0.295093	-0.348103
ALLOGRAFT_REJECTION	CCL4	14011	-0.295143	-0.342093
ALLOGRAFT_REJECTION	ITK	14053	-0.300333	-0.338534
ALLOGRAFT_REJECTION	HIF1A	14163	-0.312522	-0.338968
ALLOGRAFT_REJECTION	CD7	14168	-0.313037	-0.332843
ALLOGRAFT_REJECTION	STAT1	14280	-0.325857	-0.33313
ALLOGRAFT_REJECTION	SIT1	14317	-0.329463	-0.328667
ALLOGRAFT_REJECTION	CCR2	14333	-0.331758	-0.322847
ALLOGRAFT_REJECTION	IL16	14390	-0.339041	-0.319435
ALLOGRAFT_REJECTION	IL2RA	14403	-0.340667	-0.313247
ALLOGRAFT_REJECTION	ITGAL	14411	-0.341307	-0.306733
ALLOGRAFT_REJECTION	CD74	14412	-0.341396	-0.299781
ALLOGRAFT_REJECTION	CD3G	14413	-0.341477	-0.292828
ALLOGRAFT_REJECTION	ZAP70	14416	-0.341592	-0.285997
ALLOGRAFT_REJECTION	PRF1	14432	-0.344647	-0.279914
ALLOGRAFT_REJECTION	ITGB2	14557	-0.361597	-0.280284
ALLOGRAFT_REJECTION	CCL5	14607	-0.367006	-0.275867
ALLOGRAFT_REJECTION	CD3D	14636	-0.370113	-0.270077
ALLOGRAFT_REJECTION	GPR65	14657	-0.372729	-0.263734
ALLOGRAFT_REJECTION	CD8A	14710	-0.381018	-0.259218
ALLOGRAFT_REJECTION	IL18RAP	14746	-0.387063	-0.253519
ALLOGRAFT_REJECTION	TNF	14817	-0.394939	-0.249843
ALLOGRAFT_REJECTION	HLA-E	14819	-0.395196	-0.241858
ALLOGRAFT_REJECTION	HLA-DOB	14822	-0.395424	-0.233931
ALLOGRAFT_REJECTION	CTSS	14828	-0.396466	-0.226169
ALLOGRAFT_REJECTION	IL1B	14917	-0.40989	-0.223311
ALLOGRAFT_REJECTION	HLA-A	14965	-0.41674	-0.217756
ALLOGRAFT_REJECTION	LIF	15052	-0.429763	-0.214368
ALLOGRAFT_REJECTION	SPI1	15058	-0.430654	-0.205911
ALLOGRAFT_REJECTION	CD2	15060	-0.431051	-0.197195
ALLOGRAFT_REJECTION	CD247	15073	-0.433884	-0.189109
ALLOGRAFT_REJECTION	IRF8	15106	-0.440366	-0.182137
ALLOGRAFT_REJECTION	TGFB2	15120	-0.441896	-0.17395
ALLOGRAFT_REJECTION	BCL3	15127	-0.442367	-0.165316
ALLOGRAFT_REJECTION	ACHE	15186	-0.452008	-0.159729
ALLOGRAFT_REJECTION	PTPRC	15215	-0.457792	-0.152153
ALLOGRAFT_REJECTION	B2M	15373	-0.489809	-0.151971
ALLOGRAFT_REJECTION	LYN	15382	-0.493251	-0.142425
ALLOGRAFT_REJECTION	F2R	15412	-0.500223	-0.134048
ALLOGRAFT_REJECTION	FGR	15463	-0.511606	-0.126749
ALLOGRAFT_REJECTION	LCP2	15488	-0.517505	-0.117707
ALLOGRAFT_REJECTION	IFNAR2	15548	-0.532422	-0.110545
ALLOGRAFT_REJECTION	NCR1	15592	-0.546106	-0.102107
ALLOGRAFT_REJECTION	HLA-DOA	15635	-0.557794	-0.0933677
ALLOGRAFT_REJECTION	C2	15806	-0.623354	-0.0912763
ALLOGRAFT_REJECTION	ST8SIA4	15836	-0.633737	-0.0801801
ALLOGRAFT_REJECTION	BCAT1	15845	-0.638645	-0.0676744
ALLOGRAFT_REJECTION	NLRP3	15926	-0.690873	-0.0585954
ALLOGRAFT_REJECTION	TPD52	15959	-0.716447	-0.0460022
ALLOGRAFT_REJECTION	TAP1	15979	-0.732437	-0.0322726
ALLOGRAFT_REJECTION	STAB1	15990	-0.74275	-0.0177718
ALLOGRAFT_REJECTION	HCLS1	16005	-0.756165	-0.00324726
ALLOGRAFT_REJECTION	UBE2N	16024	-0.768934	0.0112878
INFLAMMATORY_RESPONSE	IL2RB	13020	-0.202583	-0.436414
INFLAMMATORY_RESPONSE	BTG2	13034	-0.204165	-0.43355
INFLAMMATORY_RESPONSE	CD70	13043	-0.204998	-0.430359
INFLAMMATORY_RESPONSE	ATP2B1	13108	-0.210354	-0.430567
INFLAMMATORY_RESPONSE	FFAR2	13115	-0.210532	-0.427152
INFLAMMATORY_RESPONSE	VIP	13121	-0.210961	-0.423666
INFLAMMATORY_RESPONSE	AQP9	13238	-0.219986	-0.426947
INFLAMMATORY_RESPONSE	LAMP3	13265	-0.222561	-0.424563
INFLAMMATORY_RESPONSE	ICAM1	13280	-0.224038	-0.421404
INFLAMMATORY_RESPONSE	P2RY2	13312	-0.226506	-0.419261
INFLAMMATORY_RESPONSE	PIK3R5	13326	-0.227433	-0.415978
INFLAMMATORY_RESPONSE	TLR2	13335	-0.229045	-0.412355
INFLAMMATORY_RESPONSE	LDLR	13428	-0.238527	-0.413803
INFLAMMATORY_RESPONSE	LY6E	13439	-0.239768	-0.410111
INFLAMMATORY_RESPONSE	BDKRB1	13441	-0.23996	-0.405854
INFLAMMATORY_RESPONSE	MEP1A	13534	-0.249198	-0.40711
INFLAMMATORY_RESPONSE	NFKBIA	13537	-0.249632	-0.402741
INFLAMMATORY_RESPONSE	SERPINE1	13599	-0.254048	-0.401975
INFLAMMATORY_RESPONSE	TNFSF10	13601	-0.254179	-0.397462
INFLAMMATORY_RESPONSE	MSR1	13625	-0.256671	-0.394277
INFLAMMATORY_RESPONSE	CXCL10	13631	-0.257176	-0.389959
INFLAMMATORY_RESPONSE	TNFRSF9	13650	-0.259108	-0.386418
INFLAMMATORY_RESPONSE	ITGB3	13699	-0.263856	-0.384665
INFLAMMATORY_RESPONSE	ATP2A2	13743	-0.268628	-0.382513
INFLAMMATORY_RESPONSE	CLEC5A	13786	-0.273368	-0.380213
INFLAMMATORY_RESPONSE	EDN1	13789	-0.273665	-0.375412
INFLAMMATORY_RESPONSE	IL10	13829	-0.278678	-0.372829
INFLAMMATORY_RESPONSE	OLR1	13871	-0.282559	-0.370302
INFLAMMATORY_RESPONSE	SLC11A2	14093	-0.304901	-0.378607
INFLAMMATORY_RESPONSE	HIF1A	14163	-0.312522	-0.377288
INFLAMMATORY_RESPONSE	P2RX7	14164	-0.312533	-0.371662
INFLAMMATORY_RESPONSE	FZD5	14179	-0.31412	-0.366881
INFLAMMATORY_RESPONSE	PROK2	14185	-0.314744	-0.361527
INFLAMMATORY_RESPONSE	NOD2	14219	-0.318026	-0.357862
INFLAMMATORY_RESPONSE	NFKB1	14223	-0.318633	-0.352313
INFLAMMATORY_RESPONSE	OPRK1	14257	-0.322995	-0.348558
INFLAMMATORY_RESPONSE	MEFV	14269	-0.324889	-0.343396
INFLAMMATORY_RESPONSE	CHST2	14342	-0.332755	-0.3419
INFLAMMATORY_RESPONSE	CCR7	14362	-0.335114	-0.337053
INFLAMMATORY_RESPONSE	CD14	14441	-0.345794	-0.335697
INFLAMMATORY_RESPONSE	PTAFR	14445	-0.346204	-0.329652
INFLAMMATORY_RESPONSE	GPR132	14461	-0.349406	-0.324298
INFLAMMATORY_RESPONSE	IL10RA	14544	-0.35991	-0.322938
INFLAMMATORY_RESPONSE	CCL5	14607	-0.367006	-0.320201
INFLAMMATORY_RESPONSE	KCNMB2	14621	-0.368467	-0.314379
INFLAMMATORY_RESPONSE	CSF3R	14684	-0.377876	-0.311446
INFLAMMATORY_RESPONSE	ITGA5	14686	-0.37814	-0.304702
INFLAMMATORY_RESPONSE	EMP3	14741	-0.386247	-0.301119
INFLAMMATORY_RESPONSE	IL18RAP	14746	-0.387063	-0.294401
INFLAMMATORY_RESPONSE	MARCO	14807	-0.393714	-0.291058
INFLAMMATORY_RESPONSE	KCNJ2	14843	-0.398734	-0.286065
INFLAMMATORY_RESPONSE	EBI3	14883	-0.404794	-0.281212
INFLAMMATORY_RESPONSE	IL1B	14917	-0.40989	-0.275893
INFLAMMATORY_RESPONSE	PDPN	14925	-0.410693	-0.268937
INFLAMMATORY_RESPONSE	GNA15	14979	-0.418396	-0.264713
INFLAMMATORY_RESPONSE	IL15RA	14981	-0.418885	-0.257235
INFLAMMATORY_RESPONSE	SLAMF1	15041	-0.428569	-0.253202
INFLAMMATORY_RESPONSE	C3AR1	15049	-0.429543	-0.245907
INFLAMMATORY_RESPONSE	LIF	15052	-0.429763	-0.238295
INFLAMMATORY_RESPONSE	SGMS2	15084	-0.435881	-0.232383
INFLAMMATORY_RESPONSE	OSMR	15086	-0.436335	-0.224591
INFLAMMATORY_RESPONSE	CD48	15096	-0.438885	-0.217252
INFLAMMATORY_RESPONSE	CMKLR1	15097	-0.438972	-0.209349
INFLAMMATORY_RESPONSE	SELL	15147	-0.447079	-0.20436
INFLAMMATORY_RESPONSE	IL7R	15172	-0.450891	-0.197741
INFLAMMATORY_RESPONSE	SLC7A1	15203	-0.455199	-0.191419
INFLAMMATORY_RESPONSE	IRAK2	15286	-0.472467	-0.188032
INFLAMMATORY_RESPONSE	OSM	15334	-0.482092	-0.182287
INFLAMMATORY_RESPONSE	PTPRE	15337	-0.482682	-0.173723
INFLAMMATORY_RESPONSE	LYN	15382	-0.493251	-0.16759
INFLAMMATORY_RESPONSE	SCN1B	15410	-0.499	-0.160292
INFLAMMATORY_RESPONSE	CXCR6	15442	-0.506431	-0.15311
INFLAMMATORY_RESPONSE	TNFRSF1B	15467	-0.512264	-0.145386
INFLAMMATORY_RESPONSE	PLAUR	15477	-0.514801	-0.136681
INFLAMMATORY_RESPONSE	LCP2	15488	-0.517505	-0.127989
INFLAMMATORY_RESPONSE	IFNAR1	15492	-0.518361	-0.118845
INFLAMMATORY_RESPONSE	IRF1	15504	-0.520006	-0.11017
INFLAMMATORY_RESPONSE	HPN	15621	-0.554306	-0.107432
INFLAMMATORY_RESPONSE	CCRL2	15631	-0.556866	-0.0979692
INFLAMMATORY_RESPONSE	TNFSF9	15667	-0.568854	-0.0899133
INFLAMMATORY_RESPONSE	SEMA4D	15710	-0.580393	-0.0820867
INFLAMMATORY_RESPONSE	APLNR	15720	-0.585222	-0.0721134
INFLAMMATORY_RESPONSE	PTGER4	15731	-0.587687	-0.0621581
INFLAMMATORY_RESPONSE	FPR1	15863	-0.650984	-0.0586159
INFLAMMATORY_RESPONSE	ADM	15889	-0.667699	-0.0481565
INFLAMMATORY_RESPONSE	CDKN1A	15899	-0.672634	-0.0366095
INFLAMMATORY_RESPONSE	NLRP3	15926	-0.690873	-0.0257954
INFLAMMATORY_RESPONSE	STAB1	15990	-0.74275	-0.0163568
INFLAMMATORY_RESPONSE	GCH1	16031	-0.77268	-0.00494378
INFLAMMATORY_RESPONSE	MET	16111	-0.874456	0.00586706
ANGIOGENESIS	VCAN	14439	-0.345458	-0.507115
ANGIOGENESIS	SERPINA5	14558	-0.361711	-0.483802
ANGIOGENESIS	S100A4	14833	-0.397335	-0.467119
ANGIOGENESIS	FGFR1	14954	-0.415542	-0.439374
ANGIOGENESIS	JAG2	14987	-0.419441	-0.405858
ANGIOGENESIS	VTN	15114	-0.441291	-0.376305
ANGIOGENESIS	LPL	15235	-0.461041	-0.34471
ANGIOGENESIS	PRG2	15278	-0.471154	-0.307436
ANGIOGENESIS	LUM	15378	-0.492387	-0.27189
ANGIOGENESIS	KCNJ8	15513	-0.521863	-0.236014
ANGIOGENESIS	TNFRSF21	15629	-0.556365	-0.196043
ANGIOGENESIS	APP	15880	-0.662638	-0.155425
ANGIOGENESIS	LRPAP1	16146	-0.945087	-0.0918336
ANGIOGENESIS	VAV2	16187	-1.12759	0.00111279
INTERFERON_GAMMA_RESPONSE	IRF4	12854	-0.189913	-0.356153
INTERFERON_GAMMA_RESPONSE	IFI44	12876	-0.192169	-0.353989
INTERFERON_GAMMA_RESPONSE	VAMP5	12897	-0.193734	-0.351734
INTERFERON_GAMMA_RESPONSE	HLA-DRB1	12911	-0.194775	-0.349023
INTERFERON_GAMMA_RESPONSE	ADAR	12926	-0.195727	-0.346358
INTERFERON_GAMMA_RESPONSE	IL2RB	13020	-0.202583	-0.348501
INTERFERON_GAMMA_RESPONSE	IFI27	13125	-0.211632	-0.351168
INTERFERON_GAMMA_RESPONSE	PTPN1	13166	-0.214921	-0.349779
INTERFERON_GAMMA_RESPONSE	CD86	13175	-0.215637	-0.346378
INTERFERON_GAMMA_RESPONSE	HLA-DQA1	13207	-0.217813	-0.344375
INTERFERON_GAMMA_RESPONSE	CASP1	13279	-0.224031	-0.344756
INTERFERON_GAMMA_RESPONSE	ICAM1	13280	-0.224038	-0.340705
INTERFERON_GAMMA_RESPONSE	HLA-DMA	13415	-0.237129	-0.344784
INTERFERON_GAMMA_RESPONSE	LY6E	13439	-0.239768	-0.341883
INTERFERON_GAMMA_RESPONSE	SOCS1	13529	-0.248616	-0.342945
INTERFERON_GAMMA_RESPONSE	NFKBIA	13537	-0.249632	-0.338867
INTERFERON_GAMMA_RESPONSE	XAF1	13538	-0.249991	-0.334346
INTERFERON_GAMMA_RESPONSE	ZBP1	13553	-0.251268	-0.330675
INTERFERON_GAMMA_RESPONSE	IFI30	13564	-0.251998	-0.326742
INTERFERON_GAMMA_RESPONSE	TNFSF10	13601	-0.254179	-0.324393
INTERFERON_GAMMA_RESPONSE	ZNFX1	13628	-0.256804	-0.321372
INTERFERON_GAMMA_RESPONSE	CXCL10	13631	-0.257176	-0.316846
INTERFERON_GAMMA_RESPONSE	RSAD2	13653	-0.259454	-0.313465
INTERFERON_GAMMA_RESPONSE	IL7	13676	-0.261803	-0.310104
INTERFERON_GAMMA_RESPONSE	PTPN6	13783	-0.272597	-0.311793
INTERFERON_GAMMA_RESPONSE	SOCS3	13859	-0.281468	-0.311385
INTERFERON_GAMMA_RESPONSE	GZMA	13895	-0.285313	-0.308411
INTERFERON_GAMMA_RESPONSE	IRF5	14012	-0.295189	-0.310316
INTERFERON_GAMMA_RESPONSE	ISG15	14069	-0.30174	-0.308356
INTERFERON_GAMMA_RESPONSE	FCGR1A	14142	-0.310244	-0.307241
INTERFERON_GAMMA_RESPONSE	HIF1A	14163	-0.312522	-0.302837
INTERFERON_GAMMA_RESPONSE	LAP3	14212	-0.317473	-0.300093
INTERFERON_GAMMA_RESPONSE	NFKB1	14223	-0.318633	-0.294955
INTERFERON_GAMMA_RESPONSE	SP110	14272	-0.325144	-0.292071
INTERFERON_GAMMA_RESPONSE	STAT1	14280	-0.325857	-0.286615
INTERFERON_GAMMA_RESPONSE	IFI44L	14281	-0.325907	-0.280721
INTERFERON_GAMMA_RESPONSE	MVP	14352	-0.334085	-0.27905
INTERFERON_GAMMA_RESPONSE	CD74	14412	-0.341396	-0.27656
INTERFERON_GAMMA_RESPONSE	SECTM1	14454	-0.348806	-0.272811
INTERFERON_GAMMA_RESPONSE	PTGS2	14513	-0.356362	-0.269988
INTERFERON_GAMMA_RESPONSE	IL10RA	14544	-0.35991	-0.265352
INTERFERON_GAMMA_RESPONSE	CCL5	14607	-0.367006	-0.262586
INTERFERON_GAMMA_RESPONSE	CASP8	14690	-0.378419	-0.260863
INTERFERON_GAMMA_RESPONSE	UPP1	14728	-0.384528	-0.256219
INTERFERON_GAMMA_RESPONSE	P2RY14	14849	-0.40031	-0.256472
INTERFERON_GAMMA_RESPONSE	HLA-B	14892	-0.406314	-0.251746
INTERFERON_GAMMA_RESPONSE	HLA-A	14965	-0.41674	-0.248705
INTERFERON_GAMMA_RESPONSE	IL15RA	14981	-0.418885	-0.242066
INTERFERON_GAMMA_RESPONSE	NCOA3	14994	-0.420204	-0.235215
INTERFERON_GAMMA_RESPONSE	METTL7B	15024	-0.426032	-0.229321
INTERFERON_GAMMA_RESPONSE	CMKLR1	15097	-0.438972	-0.225878
INTERFERON_GAMMA_RESPONSE	IRF8	15106	-0.440366	-0.218413
INTERFERON_GAMMA_RESPONSE	AUTS2	15107	-0.440403	-0.210448
INTERFERON_GAMMA_RESPONSE	CSF2RB	15166	-0.449862	-0.205934
INTERFERON_GAMMA_RESPONSE	LGALS3BP	15184	-0.451884	-0.198823
INTERFERON_GAMMA_RESPONSE	RAPGEF6	15341	-0.483236	-0.199824
INTERFERON_GAMMA_RESPONSE	B2M	15373	-0.489809	-0.192902
INTERFERON_GAMMA_RESPONSE	IL18BP	15392	-0.494808	-0.185077
INTERFERON_GAMMA_RESPONSE	STAT3	15430	-0.503492	-0.178281
INTERFERON_GAMMA_RESPONSE	LCP2	15488	-0.517505	-0.172481
INTERFERON_GAMMA_RESPONSE	IRF1	15504	-0.520006	-0.164013
INTERFERON_GAMMA_RESPONSE	IFNAR2	15548	-0.532422	-0.157069
INTERFERON_GAMMA_RESPONSE	NLRC5	15580	-0.541725	-0.149207
INTERFERON_GAMMA_RESPONSE	MX2	15612	-0.550961	-0.141178
INTERFERON_GAMMA_RESPONSE	EPSTI1	15634	-0.5575	-0.132406
INTERFERON_GAMMA_RESPONSE	CFB	15679	-0.570742	-0.124832
INTERFERON_GAMMA_RESPONSE	GBP4	15691	-0.573988	-0.115138
INTERFERON_GAMMA_RESPONSE	ARID5B	15713	-0.581764	-0.105927
INTERFERON_GAMMA_RESPONSE	FGL2	15797	-0.616943	-0.0999522
INTERFERON_GAMMA_RESPONSE	ST8SIA4	15836	-0.633737	-0.0908634
INTERFERON_GAMMA_RESPONSE	FPR1	15863	-0.650984	-0.0807133
INTERFERON_GAMMA_RESPONSE	CDKN1A	15899	-0.672634	-0.0707337
INTERFERON_GAMMA_RESPONSE	PFKP	15975	-0.730375	-0.0622077
INTERFERON_GAMMA_RESPONSE	TAP1	15979	-0.732437	-0.0491482
INTERFERON_GAMMA_RESPONSE	GCH1	16031	-0.77268	-0.0383583
INTERFERON_GAMMA_RESPONSE	PSMB8	16084	-0.825517	-0.0266753
INTERFERON_GAMMA_RESPONSE	ISG20	16127	-0.90135	-0.0129963
INTERFERON_GAMMA_RESPONSE	RNF213	16162	-0.984444	0.00268512

## Sheet: Fig5B pathway genes
Pathway	Symbol	RANK.IN.GENE.LIST	RANK.METRIC.SCORE	RUNNING.ES
ALLOGRAFT_REJECTION	BCAT1	62	0.887672	0.0159003
ALLOGRAFT_REJECTION	LIF	114	0.784642	0.0301873
ALLOGRAFT_REJECTION	IL6	245	0.66721	0.0370477
ALLOGRAFT_REJECTION	CD7	329	0.615481	0.04563
ALLOGRAFT_REJECTION	CCL4	344	0.604546	0.0581818
ALLOGRAFT_REJECTION	GZMB	426	0.565171	0.0657705
ALLOGRAFT_REJECTION	IL12RB1	436	0.560574	0.0776524
ALLOGRAFT_REJECTION	CD3D	457	0.552477	0.0886832
ALLOGRAFT_REJECTION	GZMA	512	0.533285	0.097213
ALLOGRAFT_REJECTION	CD3G	527	0.526861	0.108042
ALLOGRAFT_REJECTION	IL27RA	546	0.51892	0.118451
ALLOGRAFT_REJECTION	PRF1	552	0.517318	0.129618
ALLOGRAFT_REJECTION	CD8A	555	0.517054	0.140962
ALLOGRAFT_REJECTION	CD8B	564	0.514332	0.151879
ALLOGRAFT_REJECTION	CXCL9	581	0.508673	0.162183
ALLOGRAFT_REJECTION	IL1B	606	0.502303	0.171857
ALLOGRAFT_REJECTION	CCL5	659	0.488841	0.179523
ALLOGRAFT_REJECTION	LCK	660	0.488811	0.190363
ALLOGRAFT_REJECTION	IRF8	663	0.488405	0.201072
ALLOGRAFT_REJECTION	TNF	664	0.488353	0.211901
ALLOGRAFT_REJECTION	TPD52	665	0.488175	0.222727
ALLOGRAFT_REJECTION	CD247	686	0.484789	0.232257
ALLOGRAFT_REJECTION	GBP2	688	0.484456	0.242939
ALLOGRAFT_REJECTION	CD28	728	0.474633	0.251084
ALLOGRAFT_REJECTION	CD2	764	0.466188	0.259285
ALLOGRAFT_REJECTION	ST8SIA4	794	0.460589	0.267729
ALLOGRAFT_REJECTION	CXCL13	797	0.459895	0.277806
ALLOGRAFT_REJECTION	HLA-DOB	799	0.459758	0.28794
ALLOGRAFT_REJECTION	FASLG	805	0.458711	0.297807
ALLOGRAFT_REJECTION	SIT1	807	0.458542	0.307915
ALLOGRAFT_REJECTION	CXCR3	837	0.453989	0.316212
ALLOGRAFT_REJECTION	IL11	857	0.449875	0.325029
ALLOGRAFT_REJECTION	HLA-DOA	870	0.446947	0.334208
ALLOGRAFT_REJECTION	TRAT1	888	0.44417	0.34302
ALLOGRAFT_REJECTION	ZAP70	893	0.442585	0.35259
ALLOGRAFT_REJECTION	ACHE	911	0.439261	0.361294
ALLOGRAFT_REJECTION	LCP2	915	0.438443	0.370833
ALLOGRAFT_REJECTION	F2R	919	0.438187	0.380368
ALLOGRAFT_REJECTION	IL2RG	925	0.436943	0.389752
ALLOGRAFT_REJECTION	IL2RB	939	0.434073	0.398584
ALLOGRAFT_REJECTION	CD3E	944	0.43285	0.407939
ALLOGRAFT_REJECTION	MMP9	1025	0.418201	0.41233
ALLOGRAFT_REJECTION	GLMN	1052	0.413969	0.419923
ALLOGRAFT_REJECTION	CRTAM	1053	0.413932	0.429102
ALLOGRAFT_REJECTION	INHBB	1069	0.411115	0.437303
ALLOGRAFT_REJECTION	CD96	1071	0.41052	0.446346
ALLOGRAFT_REJECTION	TGFB2	1091	0.407301	0.454218
ALLOGRAFT_REJECTION	ITGAL	1139	0.400635	0.460234
ALLOGRAFT_REJECTION	IL15	1141	0.400229	0.469048
ALLOGRAFT_REJECTION	BCL3	1151	0.398915	0.477345
ALLOGRAFT_REJECTION	TAP1	1174	0.396729	0.4848
ALLOGRAFT_REJECTION	PTPRC	1220	0.389999	0.490702
ALLOGRAFT_REJECTION	ITK	1234	0.388397	0.498521
ALLOGRAFT_REJECTION	HLA-DQA1	1236	0.38757	0.507055
ALLOGRAFT_REJECTION	IL18	1303	0.378989	0.51143
ALLOGRAFT_REJECTION	CCR5	1358	0.370848	0.516358
ALLOGRAFT_REJECTION	HCLS1	1379	0.366993	0.523276
ALLOGRAFT_REJECTION	MAP4K1	1417	0.363099	0.529069
ALLOGRAFT_REJECTION	CD86	1435	0.36005	0.536016
ALLOGRAFT_REJECTION	IGSF6	1475	0.354442	0.541495
ALLOGRAFT_REJECTION	LYN	1643	0.332858	0.538682
ALLOGRAFT_REJECTION	PTPN6	1659	0.330068	0.545086
ALLOGRAFT_REJECTION	CCL22	1669	0.329058	0.551834
ALLOGRAFT_REJECTION	WAS	1696	0.325489	0.557465
ALLOGRAFT_REJECTION	B2M	1729	0.320989	0.56263
ALLOGRAFT_REJECTION	CCND2	1772	0.314514	0.567041
ALLOGRAFT_REJECTION	NCF4	1863	0.304594	0.568302
ALLOGRAFT_REJECTION	GPR65	1898	0.300885	0.572898
ALLOGRAFT_REJECTION	IL10	1900	0.300277	0.579496
ALLOGRAFT_REJECTION	LTB	1920	0.298754	0.584962
ALLOGRAFT_REJECTION	C2	2024	0.290007	0.585105
ALLOGRAFT_REJECTION	HLA-DRA	2030	0.288843	0.591206
ALLOGRAFT_REJECTION	IFNAR2	2166	0.275296	0.58907
ALLOGRAFT_REJECTION	STAT1	2211	0.27206	0.592417
ALLOGRAFT_REJECTION	CD1D	2218	0.271458	0.598071
ALLOGRAFT_REJECTION	FAS	2242	0.269557	0.602644
ALLOGRAFT_REJECTION	HLA-DMA	2245	0.269164	0.608491
ALLOGRAFT_REJECTION	THY1	2247	0.26905	0.614397
ALLOGRAFT_REJECTION	CD40LG	2324	0.26228	0.615574
ALLOGRAFT_REJECTION	JAK2	2349	0.259337	0.61986
ALLOGRAFT_REJECTION	IL2RA	2507	0.247346	0.615761
ALLOGRAFT_REJECTION	CD74	2689	0.232024	0.609858
ALLOGRAFT_REJECTION	INHBA	2702	0.230852	0.614245
ALLOGRAFT_REJECTION	HLA-G	2704	0.23078	0.619301
ALLOGRAFT_REJECTION	CFP	2736	0.228211	0.62247
ALLOGRAFT_REJECTION	HLA-DMB	2760	0.226068	0.626079
ALLOGRAFT_REJECTION	KLRD1	2776	0.225341	0.630161
ALLOGRAFT_REJECTION	LY86	2790	0.224599	0.634348
IL6_JAK_STAT3_SIGNALING	IL3RA	87	0.824041	0.0351775
IL6_JAK_STAT3_SIGNALING	IRF1	121	0.778911	0.0714165
IL6_JAK_STAT3_SIGNALING	ITGB3	151	0.744494	0.106209
IL6_JAK_STAT3_SIGNALING	IL6	245	0.66721	0.133322
IL6_JAK_STAT3_SIGNALING	IL1R2	380	0.583433	0.153834
IL6_JAK_STAT3_SIGNALING	IL12RB1	436	0.560574	0.178018
IL6_JAK_STAT3_SIGNALING	ITGA4	448	0.555914	0.204644
IL6_JAK_STAT3_SIGNALING	CSF2RA	476	0.544709	0.229749
IL6_JAK_STAT3_SIGNALING	CXCL10	563	0.514857	0.249807
IL6_JAK_STAT3_SIGNALING	IL15RA	571	0.511186	0.27448
IL6_JAK_STAT3_SIGNALING	CXCL9	581	0.508673	0.298908
IL6_JAK_STAT3_SIGNALING	IL1B	606	0.502303	0.322113
IL6_JAK_STAT3_SIGNALING	MAP3K8	647	0.492141	0.343847
IL6_JAK_STAT3_SIGNALING	TNF	664	0.488353	0.366853
IL6_JAK_STAT3_SIGNALING	EBI3	712	0.479956	0.387565
IL6_JAK_STAT3_SIGNALING	CXCL13	797	0.459895	0.405046
IL6_JAK_STAT3_SIGNALING	IL2RG	925	0.436943	0.41879
IL6_JAK_STAT3_SIGNALING	CD38	1283	0.381651	0.415862
IL6_JAK_STAT3_SIGNALING	TNFRSF1B	1309	0.378339	0.43292
IL6_JAK_STAT3_SIGNALING	CXCL11	1427	0.361486	0.443566
IL6_JAK_STAT3_SIGNALING	TNFRSF12A	1436	0.359853	0.460749
IL6_JAK_STAT3_SIGNALING	CSF2RB	1587	0.340296	0.468352
IL6_JAK_STAT3_SIGNALING	SOCS3	1646	0.332429	0.481153
IL6_JAK_STAT3_SIGNALING	LEPR	1648	0.332063	0.497396
IL6_JAK_STAT3_SIGNALING	TNFRSF21	1657	0.330218	0.513123
IL6_JAK_STAT3_SIGNALING	CD9	1822	0.308129	0.518298
IL6_JAK_STAT3_SIGNALING	LTB	1920	0.298754	0.527078
IL6_JAK_STAT3_SIGNALING	STAT1	2211	0.27206	0.522835
IL6_JAK_STAT3_SIGNALING	FAS	2242	0.269557	0.534249
IL6_JAK_STAT3_SIGNALING	PIK3R5	2311	0.263477	0.543058
IL6_JAK_STAT3_SIGNALING	HMOX1	2490	0.248284	0.544445
IL6_JAK_STAT3_SIGNALING	INHBE	2506	0.247367	0.555679
IL6_JAK_STAT3_SIGNALING	IL2RA	2507	0.247346	0.567823
IL6_JAK_STAT3_SIGNALING	IL18R1	2881	0.217707	0.555874
IL6_JAK_STAT3_SIGNALING	CCR1	2953	0.212554	0.562001
IL6_JAK_STAT3_SIGNALING	IFNGR1	3053	0.206032	0.566108
IL6_JAK_STAT3_SIGNALING	IL7	3159	0.198925	0.569502
IL6_JAK_STAT3_SIGNALING	IL6ST	3162	0.198667	0.579134
IL6_JAK_STAT3_SIGNALING	LTBR	3210	0.195694	0.58589
IL6_JAK_STAT3_SIGNALING	TNFRSF1A	3271	0.19191	0.59167
IL6_JAK_STAT3_SIGNALING	CD36	3354	0.186384	0.595845
IL6_JAK_STAT3_SIGNALING	ACVRL1	3356	0.186257	0.604928
IL6_JAK_STAT3_SIGNALING	OSMR	3396	0.183471	0.611569
IL6_JAK_STAT3_SIGNALING	PLA2G2A	3452	0.180615	0.617099
IL6_JAK_STAT3_SIGNALING	STAM2	3484	0.178785	0.623995
IL6_JAK_STAT3_SIGNALING	IRF9	3556	0.174674	0.628262
IL6_JAK_STAT3_SIGNALING	CSF3R	3597	0.172383	0.634298
IL6_JAK_STAT3_SIGNALING	STAT3	3854	0.159628	0.626598
IL6_JAK_STAT3_SIGNALING	CXCL1	3928	0.156354	0.629844
IL6_JAK_STAT3_SIGNALING	CNTFR	3950	0.155048	0.636182
IL6_JAK_STAT3_SIGNALING	IL13RA1	4048	0.151935	0.637755
INTERFERON_GAMMA_RESPONSE	ISG20	57	0.896181	0.0161378
INTERFERON_GAMMA_RESPONSE	IRF1	121	0.778911	0.0293415
INTERFERON_GAMMA_RESPONSE	PTGS2	196	0.708989	0.0403421
INTERFERON_GAMMA_RESPONSE	SECTM1	212	0.694317	0.0546269
INTERFERON_GAMMA_RESPONSE	IL6	245	0.66721	0.0672793
INTERFERON_GAMMA_RESPONSE	NLRC5	281	0.642779	0.0792136
INTERFERON_GAMMA_RESPONSE	FGL2	427	0.56404	0.0827018
INTERFERON_GAMMA_RESPONSE	IDO1	443	0.55709	0.0939821
INTERFERON_GAMMA_RESPONSE	GZMA	512	0.533285	0.101502
INTERFERON_GAMMA_RESPONSE	PSMB9	550	0.517963	0.110582
INTERFERON_GAMMA_RESPONSE	CXCL10	563	0.514857	0.121121
INTERFERON_GAMMA_RESPONSE	IL15RA	571	0.511186	0.131885
INTERFERON_GAMMA_RESPONSE	CXCL9	581	0.508673	0.142472
INTERFERON_GAMMA_RESPONSE	CCL5	659	0.488841	0.148469
INTERFERON_GAMMA_RESPONSE	IRF8	663	0.488405	0.158979
INTERFERON_GAMMA_RESPONSE	CFB	674	0.486831	0.169027
INTERFERON_GAMMA_RESPONSE	TNFAIP6	696	0.482703	0.178312
INTERFERON_GAMMA_RESPONSE	C1S	719	0.477298	0.187417
INTERFERON_GAMMA_RESPONSE	GBP4	736	0.472733	0.19679
INTERFERON_GAMMA_RESPONSE	IRF5	774	0.464481	0.204698
INTERFERON_GAMMA_RESPONSE	CMPK2	785	0.461708	0.214196
INTERFERON_GAMMA_RESPONSE	RSAD2	790	0.46108	0.224046
INTERFERON_GAMMA_RESPONSE	ST8SIA4	794	0.460589	0.233947
INTERFERON_GAMMA_RESPONSE	APOL6	803	0.458884	0.243505
INTERFERON_GAMMA_RESPONSE	C1R	855	0.450685	0.250256
INTERFERON_GAMMA_RESPONSE	GCH1	902	0.440276	0.257084
INTERFERON_GAMMA_RESPONSE	LCP2	915	0.438443	0.26595
INTERFERON_GAMMA_RESPONSE	IL2RB	939	0.434073	0.274048
INTERFERON_GAMMA_RESPONSE	FCGR1A	971	0.428126	0.281527
INTERFERON_GAMMA_RESPONSE	GPR18	988	0.425773	0.289872
INTERFERON_GAMMA_RESPONSE	KLRK1	1001	0.423116	0.298402
INTERFERON_GAMMA_RESPONSE	TNFAIP2	1077	0.409845	0.302792
INTERFERON_GAMMA_RESPONSE	EPSTI1	1079	0.408933	0.311684
INTERFERON_GAMMA_RESPONSE	IL18BP	1089	0.407327	0.320052
INTERFERON_GAMMA_RESPONSE	PFKP	1113	0.404047	0.327493
INTERFERON_GAMMA_RESPONSE	CASP1	1122	0.402138	0.335808
INTERFERON_GAMMA_RESPONSE	IL15	1141	0.400229	0.343471
INTERFERON_GAMMA_RESPONSE	IFI27	1172	0.39686	0.350327
INTERFERON_GAMMA_RESPONSE	TAP1	1174	0.396729	0.358952
INTERFERON_GAMMA_RESPONSE	HLA-DQA1	1236	0.38757	0.363709
INTERFERON_GAMMA_RESPONSE	ISG15	1237	0.387507	0.372194
INTERFERON_GAMMA_RESPONSE	CIITA	1279	0.382327	0.378059
INTERFERON_GAMMA_RESPONSE	CD38	1283	0.381651	0.386231
INTERFERON_GAMMA_RESPONSE	METTL7B	1334	0.374507	0.391375
INTERFERON_GAMMA_RESPONSE	CD69	1348	0.372015	0.398726
INTERFERON_GAMMA_RESPONSE	PELI1	1381	0.366836	0.404802
INTERFERON_GAMMA_RESPONSE	AUTS2	1392	0.366127	0.412207
INTERFERON_GAMMA_RESPONSE	CXCL11	1427	0.361486	0.418044
INTERFERON_GAMMA_RESPONSE	CD86	1435	0.36005	0.425499
INTERFERON_GAMMA_RESPONSE	HLA-DRB1	1469	0.355952	0.431275
INTERFERON_GAMMA_RESPONSE	HLA-B	1471	0.355549	0.438999
INTERFERON_GAMMA_RESPONSE	TNFSF10	1488	0.353333	0.445757
INTERFERON_GAMMA_RESPONSE	IL10RA	1546	0.345755	0.449844
INTERFERON_GAMMA_RESPONSE	CSF2RB	1587	0.340296	0.45485
INTERFERON_GAMMA_RESPONSE	SOCS3	1646	0.332429	0.458584
INTERFERON_GAMMA_RESPONSE	PTPN6	1659	0.330068	0.465077
INTERFERON_GAMMA_RESPONSE	DDX60	1679	0.327178	0.471079
INTERFERON_GAMMA_RESPONSE	B2M	1729	0.320989	0.475112
INTERFERON_GAMMA_RESPONSE	XAF1	1768	0.314727	0.479681
INTERFERON_GAMMA_RESPONSE	ZBP1	1907	0.299769	0.477811
INTERFERON_GAMMA_RESPONSE	SPPL2A	1958	0.296035	0.481237
INTERFERON_GAMMA_RESPONSE	VCAM1	1962	0.295306	0.487519
INTERFERON_GAMMA_RESPONSE	OASL	2022	0.290127	0.490266
INTERFERON_GAMMA_RESPONSE	PSMB8	2023	0.290115	0.496617
INTERFERON_GAMMA_RESPONSE	CDKN1A	2064	0.28543	0.500422
INTERFERON_GAMMA_RESPONSE	SAMD9L	2084	0.282546	0.505447
INTERFERON_GAMMA_RESPONSE	IFNAR2	2166	0.275296	0.506525
INTERFERON_GAMMA_RESPONSE	IFI44L	2177	0.274284	0.511919
INTERFERON_GAMMA_RESPONSE	BANK1	2197	0.27319	0.516739
INTERFERON_GAMMA_RESPONSE	STAT1	2211	0.27206	0.521901
INTERFERON_GAMMA_RESPONSE	FAS	2242	0.269557	0.52597
INTERFERON_GAMMA_RESPONSE	HLA-DMA	2245	0.269164	0.53174
INTERFERON_GAMMA_RESPONSE	XCL1	2273	0.26644	0.535924
INTERFERON_GAMMA_RESPONSE	JAK2	2349	0.259337	0.537019
INTERFERON_GAMMA_RESPONSE	BST2	2586	0.239823	0.527848
INTERFERON_GAMMA_RESPONSE	PSMA3	2675	0.233144	0.527574
INTERFERON_GAMMA_RESPONSE	CD74	2689	0.232024	0.53186
INTERFERON_GAMMA_RESPONSE	HLA-G	2704	0.23078	0.536057
INTERFERON_GAMMA_RESPONSE	LAP3	2746	0.227322	0.538529
INTERFERON_GAMMA_RESPONSE	MX2	2806	0.222997	0.539805
INTERFERON_GAMMA_RESPONSE	DDX58	2954	0.212443	0.535474
INTERFERON_GAMMA_RESPONSE	CASP8	3020	0.207751	0.53605
INTERFERON_GAMMA_RESPONSE	FPR1	3072	0.205004	0.537422
INTERFERON_GAMMA_RESPONSE	IL7	3159	0.198925	0.536522
INTERFERON_GAMMA_RESPONSE	PARP12	3182	0.197155	0.539494
INTERFERON_GAMMA_RESPONSE	CMKLR1	3203	0.195992	0.542563
INTERFERON_GAMMA_RESPONSE	STAT4	3211	0.195389	0.546413
INFLAMMATORY_RESPONSE	LIF	114	0.784642	0.00990325
INFLAMMATORY_RESPONSE	IRF1	121	0.778911	0.0262776
INFLAMMATORY_RESPONSE	ITGB3	151	0.744494	0.0405078
INFLAMMATORY_RESPONSE	PTGER4	200	0.705153	0.0527325
INFLAMMATORY_RESPONSE	LPAR1	217	0.692386	0.0666366
INFLAMMATORY_RESPONSE	IL6	245	0.66721	0.079328
INFLAMMATORY_RESPONSE	SERPINE1	279	0.644495	0.0911648
INFLAMMATORY_RESPONSE	CD70	290	0.638031	0.104267
INFLAMMATORY_RESPONSE	SCN1B	359	0.593235	0.112865
INFLAMMATORY_RESPONSE	FFAR2	361	0.592333	0.125535
INFLAMMATORY_RESPONSE	SLAMF1	435	0.560716	0.133129
INFLAMMATORY_RESPONSE	RASGRP1	530	0.525685	0.138687
INFLAMMATORY_RESPONSE	CXCL10	563	0.514857	0.147799
INFLAMMATORY_RESPONSE	IL15RA	571	0.511186	0.158358
INFLAMMATORY_RESPONSE	CXCL9	581	0.508673	0.168741
INFLAMMATORY_RESPONSE	IL1B	606	0.502303	0.178072
INFLAMMATORY_RESPONSE	PTPRE	641	0.49398	0.186613
INFLAMMATORY_RESPONSE	CCL5	659	0.488841	0.196081
INFLAMMATORY_RESPONSE	LCK	660	0.488811	0.206587
INFLAMMATORY_RESPONSE	TNFAIP6	696	0.482703	0.214824
INFLAMMATORY_RESPONSE	EBI3	712	0.479956	0.224224
INFLAMMATORY_RESPONSE	GPC3	738	0.47246	0.232851
INFLAMMATORY_RESPONSE	APLNR	765	0.466174	0.241283
INFLAMMATORY_RESPONSE	SGMS2	769	0.465738	0.25111
INFLAMMATORY_RESPONSE	CD48	801	0.459496	0.259093
INFLAMMATORY_RESPONSE	CXCR6	840	0.453071	0.26651
INFLAMMATORY_RESPONSE	SPHK1	866	0.44786	0.274609
INFLAMMATORY_RESPONSE	LTA	882	0.445094	0.283259
INFLAMMATORY_RESPONSE	GCH1	902	0.440276	0.291562
INFLAMMATORY_RESPONSE	LCP2	915	0.438443	0.300252
INFLAMMATORY_RESPONSE	IL2RB	939	0.434073	0.308177
INFLAMMATORY_RESPONSE	CALCRL	955	0.431096	0.316527
INFLAMMATORY_RESPONSE	HPN	965	0.429826	0.325215
INFLAMMATORY_RESPONSE	ITGA5	1037	0.416187	0.329825
INFLAMMATORY_RESPONSE	CCL17	1051	0.414	0.337929
INFLAMMATORY_RESPONSE	TNFSF9	1111	0.404268	0.343015
INFLAMMATORY_RESPONSE	IL15	1141	0.400229	0.349847
INFLAMMATORY_RESPONSE	CCRL2	1148	0.399449	0.358065
INFLAMMATORY_RESPONSE	IL18	1303	0.378989	0.356808
INFLAMMATORY_RESPONSE	TNFRSF1B	1309	0.378339	0.364634
INFLAMMATORY_RESPONSE	ADORA2B	1313	0.37772	0.372569
INFLAMMATORY_RESPONSE	CD69	1348	0.372015	0.378488
INFLAMMATORY_RESPONSE	KCNJ2	1371	0.368411	0.385063
INFLAMMATORY_RESPONSE	TACR1	1411	0.363703	0.390499
INFLAMMATORY_RESPONSE	CXCL11	1427	0.361486	0.397352
INFLAMMATORY_RESPONSE	TNFSF10	1488	0.353333	0.401283
INFLAMMATORY_RESPONSE	TNFSF15	1498	0.352466	0.408308
INFLAMMATORY_RESPONSE	NOD2	1533	0.346861	0.413687
INFLAMMATORY_RESPONSE	IL10RA	1546	0.345755	0.420386
INFLAMMATORY_RESPONSE	ITGB8	1551	0.344871	0.427554
INFLAMMATORY_RESPONSE	KCNA3	1579	0.340909	0.433232
INFLAMMATORY_RESPONSE	RGS1	1609	0.338069	0.438727
INFLAMMATORY_RESPONSE	LYN	1643	0.332858	0.443866
INFLAMMATORY_RESPONSE	LAMP3	1647	0.332274	0.450824
INFLAMMATORY_RESPONSE	SELL	1651	0.331511	0.457766
INFLAMMATORY_RESPONSE	CCL22	1669	0.329058	0.4638
INFLAMMATORY_RESPONSE	IFITM1	1812	0.30953	0.461783
INFLAMMATORY_RESPONSE	IL10	1900	0.300277	0.462924
INFLAMMATORY_RESPONSE	SELE	1976	0.293966	0.464663
INFLAMMATORY_RESPONSE	BDKRB1	2000	0.29193	0.469533
INFLAMMATORY_RESPONSE	GPR132	2044	0.287819	0.473094
INFLAMMATORY_RESPONSE	CDKN1A	2064	0.28543	0.478068
INFLAMMATORY_RESPONSE	AHR	2113	0.280462	0.481165
INFLAMMATORY_RESPONSE	CHST2	2120	0.28018	0.48682
INFLAMMATORY_RESPONSE	MSR1	2291	0.264915	0.482134
INFLAMMATORY_RESPONSE	PIK3R5	2311	0.263477	0.486637
INFLAMMATORY_RESPONSE	PTGIR	2363	0.258441	0.489078
INFLAMMATORY_RESPONSE	ATP2B1	2499	0.247805	0.486161
INFLAMMATORY_RESPONSE	SLC31A2	2551	0.243722	0.488285
INFLAMMATORY_RESPONSE	LDLR	2554	0.243049	0.493387
INFLAMMATORY_RESPONSE	BST2	2586	0.239823	0.496648
INFLAMMATORY_RESPONSE	SLC11A2	2670	0.233558	0.4966
INFLAMMATORY_RESPONSE	INHBA	2702	0.230852	0.499669
INFLAMMATORY_RESPONSE	GPR183	2721	0.229736	0.503507
INFLAMMATORY_RESPONSE	HRH1	2759	0.226104	0.506108
INFLAMMATORY_RESPONSE	MEFV	2765	0.225732	0.510654
INFLAMMATORY_RESPONSE	P2RX4	2804	0.223251	0.513132
INFLAMMATORY_RESPONSE	FZD5	2809	0.222723	0.517675
INFLAMMATORY_RESPONSE	IL18R1	2881	0.217707	0.518019
INFLAMMATORY_RESPONSE	SCARF1	3023	0.207622	0.513872
INFLAMMATORY_RESPONSE	CYBB	3029	0.207089	0.518017
INFLAMMATORY_RESPONSE	OSM	3059	0.205654	0.520667
INFLAMMATORY_RESPONSE	FPR1	3072	0.205004	0.52434
INFLAMMATORY_RESPONSE	EMP3	3167	0.198342	0.522863
INFLAMMATORY_RESPONSE	CMKLR1	3203	0.195992	0.524939
INFLAMMATORY_RESPONSE	RGS16	3257	0.192527	0.52584
INFLAMMATORY_RESPONSE	IL7R	3272	0.1919	0.52911
INFLAMMATORY_RESPONSE	P2RY2	3280	0.191319	0.532795
INFLAMMATORY_RESPONSE	CCR7	3302	0.189635	0.535588
INFLAMMATORY_RESPONSE	OSMR	3396	0.183471	0.533853
INFLAMMATORY_RESPONSE	GNA15	3472	0.179275	0.533127
INFLAMMATORY_RESPONSE	C3AR1	3532	0.176233	0.533312
INFLAMMATORY_RESPONSE	CSF3R	3597	0.172383	0.533109
INFLAMMATORY_RESPONSE	MET	3614	0.171416	0.535816
INFLAMMATORY_RESPONSE	EDN1	3648	0.169387	0.537442
EPITHELIAL_MESENCHYMAL_TRANSITION	GEM	26	1.01954	0.018518
EPITHELIAL_MESENCHYMAL_TRANSITION	CADM1	29	0.995312	0.0380244
EPITHELIAL_MESENCHYMAL_TRANSITION	ECM1	50	0.911765	0.0547835
EPITHELIAL_MESENCHYMAL_TRANSITION	THBS2	94	0.815986	0.0682485
EPITHELIAL_MESENCHYMAL_TRANSITION	COL5A3	97	0.811195	0.0841239
EPITHELIAL_MESENCHYMAL_TRANSITION	ANPEP	133	0.765771	0.0970874
EPITHELIAL_MESENCHYMAL_TRANSITION	ITGB3	151	0.744494	0.110731
EPITHELIAL_MESENCHYMAL_TRANSITION	LAMA1	172	0.728522	0.123876
EPITHELIAL_MESENCHYMAL_TRANSITION	TFPI2	185	0.715342	0.13725
EPITHELIAL_MESENCHYMAL_TRANSITION	MSX1	214	0.693614	0.149219
EPITHELIAL_MESENCHYMAL_TRANSITION	IL6	245	0.66721	0.160544
EPITHELIAL_MESENCHYMAL_TRANSITION	NT5E	253	0.659667	0.173125
EPITHELIAL_MESENCHYMAL_TRANSITION	ITGA2	263	0.653881	0.185471
EPITHELIAL_MESENCHYMAL_TRANSITION	COL12A1	267	0.650962	0.198125
EPITHELIAL_MESENCHYMAL_TRANSITION	PTHLH	272	0.647201	0.210644
EPITHELIAL_MESENCHYMAL_TRANSITION	SERPINE1	279	0.644495	0.222988
EPITHELIAL_MESENCHYMAL_TRANSITION	PRRX1	317	0.622418	0.233002
EPITHELIAL_MESENCHYMAL_TRANSITION	HTRA1	376	0.584834	0.240992
EPITHELIAL_MESENCHYMAL_TRANSITION	CDH6	394	0.578685	0.251366
EPITHELIAL_MESENCHYMAL_TRANSITION	MMP1	483	0.540936	0.256657
EPITHELIAL_MESENCHYMAL_TRANSITION	TNFRSF11B	494	0.53885	0.266673
EPITHELIAL_MESENCHYMAL_TRANSITION	SPOCK1	516	0.53046	0.275851
EPITHELIAL_MESENCHYMAL_TRANSITION	VCAN	553	0.517121	0.28385
EPITHELIAL_MESENCHYMAL_TRANSITION	IL32	573	0.510832	0.292763
EPITHELIAL_MESENCHYMAL_TRANSITION	IGFBP2	588	0.505622	0.301879
EPITHELIAL_MESENCHYMAL_TRANSITION	PDLIM4	599	0.50302	0.311188
EPITHELIAL_MESENCHYMAL_TRANSITION	TGFBI	751	0.4697	0.311226
EPITHELIAL_MESENCHYMAL_TRANSITION	EDIL3	928	0.436436	0.30908
EPITHELIAL_MESENCHYMAL_TRANSITION	THBS1	957	0.430822	0.315866
EPITHELIAL_MESENCHYMAL_TRANSITION	ITGA5	1037	0.416187	0.319247
EPITHELIAL_MESENCHYMAL_TRANSITION	BASP1	1073	0.410194	0.325198
EPITHELIAL_MESENCHYMAL_TRANSITION	SNTB1	1090	0.407324	0.332254
EPITHELIAL_MESENCHYMAL_TRANSITION	COL5A1	1100	0.406218	0.339715
EPITHELIAL_MESENCHYMAL_TRANSITION	FOXC2	1102	0.406072	0.347662
EPITHELIAL_MESENCHYMAL_TRANSITION	IL15	1141	0.400229	0.353233
EPITHELIAL_MESENCHYMAL_TRANSITION	NNMT	1184	0.395166	0.35846
EPITHELIAL_MESENCHYMAL_TRANSITION	SLIT2	1187	0.394692	0.366122
EPITHELIAL_MESENCHYMAL_TRANSITION	COL4A1	1200	0.392672	0.373133
EPITHELIAL_MESENCHYMAL_TRANSITION	DPYSL3	1201	0.392488	0.380873
EPITHELIAL_MESENCHYMAL_TRANSITION	GREM1	1209	0.391565	0.388167
EPITHELIAL_MESENCHYMAL_TRANSITION	MMP2	1316	0.37731	0.389132
EPITHELIAL_MESENCHYMAL_TRANSITION	GJA1	1320	0.376425	0.396372
EPITHELIAL_MESENCHYMAL_TRANSITION	MXRA5	1350	0.371886	0.401935
EPITHELIAL_MESENCHYMAL_TRANSITION	ADAM12	1351	0.371877	0.409268
EPITHELIAL_MESENCHYMAL_TRANSITION	ELN	1404	0.364344	0.413277
EPITHELIAL_MESENCHYMAL_TRANSITION	LOXL2	1424	0.362212	0.419259
EPITHELIAL_MESENCHYMAL_TRANSITION	TNFRSF12A	1436	0.359853	0.425684
EPITHELIAL_MESENCHYMAL_TRANSITION	SLIT3	1502	0.351912	0.428653
EPITHELIAL_MESENCHYMAL_TRANSITION	FN1	1539	0.346656	0.43329
EPITHELIAL_MESENCHYMAL_TRANSITION	NID2	1603	0.338401	0.436114
EPITHELIAL_MESENCHYMAL_TRANSITION	COL4A2	1620	0.336089	0.441765
EPITHELIAL_MESENCHYMAL_TRANSITION	DKK1	1689	0.326546	0.44405
EPITHELIAL_MESENCHYMAL_TRANSITION	SCG2	1704	0.324476	0.449594
EPITHELIAL_MESENCHYMAL_TRANSITION	TNC	1737	0.320219	0.453954
EPITHELIAL_MESENCHYMAL_TRANSITION	BDNF	1830	0.307753	0.454402
EPITHELIAL_MESENCHYMAL_TRANSITION	ECM2	1867	0.304219	0.458203
EPITHELIAL_MESENCHYMAL_TRANSITION	CDH11	1914	0.299233	0.461293
EPITHELIAL_MESENCHYMAL_TRANSITION	CDH2	1918	0.298924	0.467005
EPITHELIAL_MESENCHYMAL_TRANSITION	VCAM1	1962	0.295306	0.470202
EPITHELIAL_MESENCHYMAL_TRANSITION	SGCB	2005	0.291637	0.473387
EPITHELIAL_MESENCHYMAL_TRANSITION	GLIPR1	2144	0.277316	0.470425
EPITHELIAL_MESENCHYMAL_TRANSITION	COL1A1	2184	0.273728	0.473441
EPITHELIAL_MESENCHYMAL_TRANSITION	LAMA3	2230	0.270874	0.476033
EPITHELIAL_MESENCHYMAL_TRANSITION	FAS	2242	0.269557	0.480677
EPITHELIAL_MESENCHYMAL_TRANSITION	THY1	2247	0.26905	0.485739
EPITHELIAL_MESENCHYMAL_TRANSITION	PTX3	2330	0.261655	0.485889
EPITHELIAL_MESENCHYMAL_TRANSITION	VEGFC	2344	0.260405	0.49023
EPITHELIAL_MESENCHYMAL_TRANSITION	LGALS1	2413	0.254009	0.491085
EPITHELIAL_MESENCHYMAL_TRANSITION	PDGFRB	2459	0.250725	0.493281
EPITHELIAL_MESENCHYMAL_TRANSITION	PCOLCE	2538	0.244842	0.493344
EPITHELIAL_MESENCHYMAL_TRANSITION	FBN1	2568	0.24208	0.496346
EPITHELIAL_MESENCHYMAL_TRANSITION	NTM	2672	0.233357	0.494655
EPITHELIAL_MESENCHYMAL_TRANSITION	CXCL12	2681	0.232646	0.498754
EPITHELIAL_MESENCHYMAL_TRANSITION	INHBA	2702	0.230852	0.502085
EPITHELIAL_MESENCHYMAL_TRANSITION	COL6A3	2714	0.230143	0.505952
EPITHELIAL_MESENCHYMAL_TRANSITION	VEGFA	2745	0.227499	0.508606
EPITHELIAL_MESENCHYMAL_TRANSITION	FZD8	2748	0.227234	0.512965
EPITHELIAL_MESENCHYMAL_TRANSITION	SGCD	2757	0.22627	0.516938
EPITHELIAL_MESENCHYMAL_TRANSITION	GPC1	2832	0.221346	0.516782
EPITHELIAL_MESENCHYMAL_TRANSITION	OXTR	2873	0.218541	0.518648
EPITHELIAL_MESENCHYMAL_TRANSITION	SPARC	2931	0.214235	0.519391
EPITHELIAL_MESENCHYMAL_TRANSITION	COL3A1	2935	0.213938	0.523427
EPITHELIAL_MESENCHYMAL_TRANSITION	FBN2	3099	0.202186	0.517456
EPITHELIAL_MESENCHYMAL_TRANSITION	RGS4	3116	0.201217	0.520446
EPITHELIAL_MESENCHYMAL_TRANSITION	WNT5A	3132	0.200462	0.523483
EPITHELIAL_MESENCHYMAL_TRANSITION	EMP3	3167	0.198342	0.525317
INTERFERON_ALPHA_RESPONSE	ISG20	57	0.896181	0.0455354
INTERFERON_ALPHA_RESPONSE	IRF1	121	0.778911	0.0842949
INTERFERON_ALPHA_RESPONSE	PSMB9	550	0.517963	0.0866206
INTERFERON_ALPHA_RESPONSE	CXCL10	563	0.514857	0.114041
INTERFERON_ALPHA_RESPONSE	GBP2	688	0.484456	0.132997
INTERFERON_ALPHA_RESPONSE	C1S	719	0.477298	0.15727
INTERFERON_ALPHA_RESPONSE	GBP4	736	0.472733	0.182144
INTERFERON_ALPHA_RESPONSE	CMPK2	785	0.461708	0.204472
INTERFERON_ALPHA_RESPONSE	RSAD2	790	0.46108	0.229438
INTERFERON_ALPHA_RESPONSE	EPSTI1	1079	0.408933	0.234305
INTERFERON_ALPHA_RESPONSE	CASP1	1122	0.402138	0.253741
INTERFERON_ALPHA_RESPONSE	IL15	1141	0.400229	0.274529
INTERFERON_ALPHA_RESPONSE	CCRL2	1148	0.399449	0.296004
INTERFERON_ALPHA_RESPONSE	IFI27	1172	0.39686	0.316305
INTERFERON_ALPHA_RESPONSE	TAP1	1174	0.396729	0.337935
INTERFERON_ALPHA_RESPONSE	ISG15	1237	0.387507	0.355355
INTERFERON_ALPHA_RESPONSE	CXCL11	1427	0.361486	0.363641
INTERFERON_ALPHA_RESPONSE	LAMP3	1647	0.332274	0.368507
INTERFERON_ALPHA_RESPONSE	SELL	1651	0.331511	0.38645
INTERFERON_ALPHA_RESPONSE	DDX60	1679	0.327178	0.402698
INTERFERON_ALPHA_RESPONSE	B2M	1729	0.320989	0.417272
INTERFERON_ALPHA_RESPONSE	SAMD9	1782	0.312906	0.431221
INTERFERON_ALPHA_RESPONSE	IFITM1	1812	0.30953	0.446383
INTERFERON_ALPHA_RESPONSE	OASL	2022	0.290127	0.449552
INTERFERON_ALPHA_RESPONSE	PSMB8	2023	0.290115	0.465414
INTERFERON_ALPHA_RESPONSE	SAMD9L	2084	0.282546	0.477218
INTERFERON_ALPHA_RESPONSE	IFI44L	2177	0.274284	0.486626
INTERFERON_ALPHA_RESPONSE	BST2	2586	0.239823	0.47496
INTERFERON_ALPHA_RESPONSE	PSMA3	2675	0.233144	0.482362
INTERFERON_ALPHA_RESPONSE	CD74	2689	0.232024	0.494258
INTERFERON_ALPHA_RESPONSE	LAP3	2746	0.227322	0.503286
INTERFERON_ALPHA_RESPONSE	PARP9	2798	0.224016	0.512436
INTERFERON_ALPHA_RESPONSE	HLA-C	2823	0.22201	0.523117
INTERFERON_ALPHA_RESPONSE	CASP8	3020	0.207751	0.522572
INTERFERON_ALPHA_RESPONSE	IL7	3159	0.198925	0.525067
INTERFERON_ALPHA_RESPONSE	PARP12	3182	0.197155	0.53451
INTERFERON_ALPHA_RESPONSE	SP110	3287	0.190657	0.538618
INTERFERON_ALPHA_RESPONSE	IRF9	3556	0.174674	0.531892
INTERFERON_ALPHA_RESPONSE	OAS1	3746	0.165036	0.529436
INTERFERON_ALPHA_RESPONSE	IFI35	3803	0.162137	0.5349
INTERFERON_ALPHA_RESPONSE	IFI44	3804	0.162087	0.543762
INTERFERON_ALPHA_RESPONSE	MX1	3937	0.156151	0.544283
INTERFERON_ALPHA_RESPONSE	IRF7	4046	0.152002	0.546034
INTERFERON_ALPHA_RESPONSE	IFI30	4270	0.141879	0.540248
INTERFERON_ALPHA_RESPONSE	PNPT1	4305	0.14026	0.545852
INTERFERON_ALPHA_RESPONSE	IFITM2	4420	0.13478	0.546297
INTERFERON_ALPHA_RESPONSE	EIF2AK2	4641	0.125796	0.539814
INTERFERON_ALPHA_RESPONSE	PSME2	4787	0.120621	0.537603
INTERFERON_ALPHA_RESPONSE	IFITM3	4792	0.120463	0.543946
INTERFERON_ALPHA_RESPONSE	CSF1	4847	0.118735	0.547158
COMPLEMENT	ME1	58	0.894913	0.0193366
COMPLEMENT	IRF1	121	0.778911	0.0354636
COMPLEMENT	DOCK4	141	0.754674	0.053596
COMPLEMENT	TFPI2	185	0.715342	0.0692578
COMPLEMENT	DOCK10	232	0.674907	0.0837028
COMPLEMENT	IL6	245	0.66721	0.100027
COMPLEMENT	ZEB1	249	0.663924	0.116816
COMPLEMENT	SERPINE1	279	0.644495	0.131521
COMPLEMENT	ADRA2B	349	0.60278	0.142718
COMPLEMENT	ZFPM2	370	0.587116	0.156506
COMPLEMENT	F5	414	0.572343	0.168512
COMPLEMENT	GZMB	426	0.565171	0.182289
COMPLEMENT	GZMK	460	0.550205	0.194339
COMPLEMENT	GZMA	512	0.533285	0.204859
COMPLEMENT	RASGRP1	530	0.525685	0.21726
COMPLEMENT	PSMB9	550	0.517963	0.229341
COMPLEMENT	SCG3	572	0.510867	0.241118
COMPLEMENT	CASP10	582	0.508258	0.253562
COMPLEMENT	CCL5	659	0.488841	0.261419
COMPLEMENT	LCK	660	0.488811	0.273915
COMPLEMENT	CFB	674	0.486831	0.285566
COMPLEMENT	C1S	719	0.477298	0.295082
COMPLEMENT	GATA3	725	0.47584	0.306941
COMPLEMENT	DGKH	811	0.45802	0.313461
COMPLEMENT	DUSP5	839	0.453352	0.323402
COMPLEMENT	C1R	855	0.450685	0.334007
COMPLEMENT	GNGT2	856	0.450189	0.345516
COMPLEMENT	LCP2	915	0.438443	0.353183
COMPLEMENT	CDH13	942	0.433228	0.362671
COMPLEMENT	CA2	943	0.432866	0.373737
COMPLEMENT	CASP1	1122	0.402138	0.37315
COMPLEMENT	SERPINC1	1335	0.374414	0.36978
COMPLEMENT	DPP4	1383	0.366658	0.376284
COMPLEMENT	PIK3CG	1438	0.359563	0.382179
COMPLEMENT	KLK1	1476	0.354364	0.388979
COMPLEMENT	FN1	1539	0.346656	0.394056
COMPLEMENT	COL4A2	1620	0.336089	0.397764
COMPLEMENT	LGALS3	1621	0.336056	0.406355
COMPLEMENT	LYN	1643	0.332858	0.413582
COMPLEMENT	WAS	1696	0.325489	0.418729
COMPLEMENT	ERAP2	1905	0.29991	0.413698
COMPLEMENT	C2	2024	0.290007	0.413908
COMPLEMENT	F7	2254	0.26776	0.406773
COMPLEMENT	C1QC	2296	0.264722	0.411038
COMPLEMENT	PIK3R5	2311	0.263477	0.416918
COMPLEMENT	VCPIP1	2313	0.26337	0.42359
COMPLEMENT	CD40LG	2324	0.26228	0.429685
COMPLEMENT	LTF	2327	0.261963	0.436259
COMPLEMENT	JAK2	2349	0.259337	0.441607
COMPLEMENT	PLA2G7	2412	0.254025	0.444316
COMPLEMENT	ADAM9	2449	0.251198	0.44854
COMPLEMENT	PLEK	2467	0.250126	0.453896
COMPLEMENT	C1QA	2561	0.242659	0.454422
COMPLEMENT	SPOCK2	2569	0.242066	0.460183
COMPLEMENT	SH2B3	2575	0.241396	0.466048
COMPLEMENT	KLKB1	2645	0.235158	0.467848
COMPLEMENT	LAP3	2746	0.227322	0.467554
COMPLEMENT	CTSH	2870	0.218775	0.465638
COMPLEMENT	USP15	2912	0.215825	0.468653
COMPLEMENT	CTSC	2971	0.211131	0.470509
COMPLEMENT	FCER1G	2999	0.208946	0.474203
COMPLEMENT	AKAP10	3080	0.20368	0.474526
COMPLEMENT	CTSO	3225	0.194402	0.470705
COMPLEMENT	HPCAL4	3263	0.1923	0.473362
COMPLEMENT	MT3	3273	0.191863	0.477717
COMPLEMENT	CD36	3354	0.186384	0.477598
COMPLEMENT	PDGFB	3375	0.18473	0.4811
COMPLEMENT	APOBEC3G	3463	0.179686	0.480382
COMPLEMENT	KCNIP3	3474	0.179118	0.48435
COMPLEMENT	DYRK2	3620	0.171149	0.479874
COMPLEMENT	DOCK9	3759	0.16448	0.475654
COMPLEMENT	PDP1	3764	0.164378	0.479612
COMPLEMENT	CPM	3868	0.15878	0.477383
COMPLEMENT	S100A13	3926	0.156379	0.477901
COMPLEMENT	CXCL1	3928	0.156354	0.481837
COMPLEMENT	C3	3944	0.155485	0.484896
COMPLEMENT	CASP3	3953	0.154891	0.488368
COMPLEMENT	CTSS	3982	0.154094	0.490598
COMPLEMENT	S100A9	3997	0.153559	0.493668
COMPLEMENT	IRF7	4046	0.152002	0.494624
TNFA_SIGNALING_VIA_NFKB	GEM	26	1.01954	0.0217637
TNFA_SIGNALING_VIA_NFKB	LIF	114	0.784642	0.0344205
TNFA_SIGNALING_VIA_NFKB	IRF1	121	0.778911	0.0518945
TNFA_SIGNALING_VIA_NFKB	SLC16A6	164	0.732532	0.0661069
TNFA_SIGNALING_VIA_NFKB	PTGS2	196	0.708989	0.0804521
TNFA_SIGNALING_VIA_NFKB	PTGER4	200	0.705153	0.0964199
TNFA_SIGNALING_VIA_NFKB	KLF4	225	0.682041	0.110575
TNFA_SIGNALING_VIA_NFKB	IL6	245	0.66721	0.124697
TNFA_SIGNALING_VIA_NFKB	SERPINE1	279	0.644495	0.137443
TNFA_SIGNALING_VIA_NFKB	EGR3	319	0.621112	0.149286
TNFA_SIGNALING_VIA_NFKB	CCL4	344	0.604546	0.161667
TNFA_SIGNALING_VIA_NFKB	FJX1	408	0.573514	0.170954
TNFA_SIGNALING_VIA_NFKB	EGR2	501	0.536233	0.177616
TNFA_SIGNALING_VIA_NFKB	LAMB3	510	0.533853	0.189355
TNFA_SIGNALING_VIA_NFKB	SLC2A3	514	0.531795	0.201352
TNFA_SIGNALING_VIA_NFKB	TNFAIP8	528	0.525848	0.212602
TNFA_SIGNALING_VIA_NFKB	CXCL10	563	0.514857	0.222317
TNFA_SIGNALING_VIA_NFKB	IL15RA	571	0.511186	0.233598
TNFA_SIGNALING_VIA_NFKB	G0S2	594	0.503951	0.243797
TNFA_SIGNALING_VIA_NFKB	IL1B	606	0.502303	0.25463
TNFA_SIGNALING_VIA_NFKB	SERPINB8	629	0.496423	0.264656
TNFA_SIGNALING_VIA_NFKB	PTPRE	641	0.49398	0.275298
TNFA_SIGNALING_VIA_NFKB	MAP3K8	647	0.492141	0.286265
TNFA_SIGNALING_VIA_NFKB	CCL5	659	0.488841	0.29679
TNFA_SIGNALING_VIA_NFKB	TNF	664	0.488353	0.307731
TNFA_SIGNALING_VIA_NFKB	FOSL1	694	0.483453	0.317032
TNFA_SIGNALING_VIA_NFKB	TNFAIP6	696	0.482703	0.328027
TNFA_SIGNALING_VIA_NFKB	PHLDA2	714	0.479183	0.337964
TNFA_SIGNALING_VIA_NFKB	BIRC3	827	0.454714	0.341537
TNFA_SIGNALING_VIA_NFKB	DUSP5	839	0.453352	0.351249
TNFA_SIGNALING_VIA_NFKB	SPHK1	866	0.44786	0.359918
TNFA_SIGNALING_VIA_NFKB	GCH1	902	0.440276	0.367864
TNFA_SIGNALING_VIA_NFKB	JAG1	954	0.431566	0.374634
TNFA_SIGNALING_VIA_NFKB	SGK1	979	0.427062	0.382949
TNFA_SIGNALING_VIA_NFKB	TNFAIP2	1077	0.409845	0.38641
TNFA_SIGNALING_VIA_NFKB	TNFSF9	1111	0.404268	0.393654
TNFA_SIGNALING_VIA_NFKB	CCRL2	1148	0.399449	0.400604
TNFA_SIGNALING_VIA_NFKB	BCL3	1151	0.398915	0.409619
TNFA_SIGNALING_VIA_NFKB	CEBPD	1165	0.39792	0.417939
TNFA_SIGNALING_VIA_NFKB	TAP1	1174	0.396729	0.426537
TNFA_SIGNALING_VIA_NFKB	IL18	1303	0.378989	0.427398
TNFA_SIGNALING_VIA_NFKB	CD69	1348	0.372015	0.43323
TNFA_SIGNALING_VIA_NFKB	CXCL11	1427	0.361486	0.436745
TNFA_SIGNALING_VIA_NFKB	ATF3	1487	0.353589	0.441239
TNFA_SIGNALING_VIA_NFKB	CLCF1	1626	0.335276	0.440488
TNFA_SIGNALING_VIA_NFKB	SOCS3	1646	0.332429	0.446941
TNFA_SIGNALING_VIA_NFKB	TNC	1737	0.320219	0.448778
TNFA_SIGNALING_VIA_NFKB	FOS	1791	0.311768	0.452681
TNFA_SIGNALING_VIA_NFKB	TSC22D1	1810	0.309842	0.458678
TNFA_SIGNALING_VIA_NFKB	TRIB1	1843	0.30635	0.46374
TNFA_SIGNALING_VIA_NFKB	CDKN1A	2064	0.28543	0.456837
TNFA_SIGNALING_VIA_NFKB	CXCL2	2304	0.264256	0.448289
TNFA_SIGNALING_VIA_NFKB	PTX3	2330	0.261655	0.452755
TNFA_SIGNALING_VIA_NFKB	SLC2A6	2360	0.258552	0.456905
TNFA_SIGNALING_VIA_NFKB	PLEK	2467	0.250126	0.456158
TNFA_SIGNALING_VIA_NFKB	ATP2B1	2499	0.247805	0.45994
TNFA_SIGNALING_VIA_NFKB	PANX1	2504	0.247507	0.465365
TNFA_SIGNALING_VIA_NFKB	PLAU	2514	0.247176	0.470477
TNFA_SIGNALING_VIA_NFKB	LDLR	2554	0.243049	0.473661
TNFA_SIGNALING_VIA_NFKB	HES1	2665	0.233789	0.472296
TNFA_SIGNALING_VIA_NFKB	INHBA	2702	0.230852	0.475384
TNFA_SIGNALING_VIA_NFKB	GPR183	2721	0.229736	0.479546
TNFA_SIGNALING_VIA_NFKB	VEGFA	2745	0.227499	0.483352
TNFA_SIGNALING_VIA_NFKB	EGR1	2905	0.216265	0.478592
TNFA_SIGNALING_VIA_NFKB	KLF2	2926	0.214814	0.48229
TNFA_SIGNALING_VIA_NFKB	DDX58	2954	0.212443	0.485507
TNFA_SIGNALING_VIA_NFKB	IL6ST	3162	0.198667	0.477411
TNFA_SIGNALING_VIA_NFKB	IL7R	3272	0.1919	0.475148
TNFA_SIGNALING_VIA_NFKB	JUNB	3299	0.189745	0.477905
TNFA_SIGNALING_VIA_NFKB	CD80	3382	0.184344	0.477118
TNFA_SIGNALING_VIA_NFKB	RELB	3386	0.184159	0.481153
TNFA_SIGNALING_VIA_NFKB	PMEPA1	3467	0.179491	0.480377
TNFA_SIGNALING_VIA_NFKB	BMP2	3479	0.178905	0.483802
TNFA_SIGNALING_VIA_NFKB	NR4A2	3496	0.178007	0.486902
TNFA_SIGNALING_VIA_NFKB	IER5	3519	0.176928	0.489611
TNFA_SIGNALING_VIA_NFKB	ZBTB10	3549	0.174901	0.491845
E2F_TARGETS	E2F8	401	0.574954	-0.00333379
E2F_TARGETS	SPC25	509	0.533923	0.0097809
E2F_TARGETS	DLGAP5	547	0.518877	0.0266177
E2F_TARGETS	RRM2	604	0.502519	0.0416918
E2F_TARGETS	CENPE	691	0.483684	0.0542403
E2F_TARGETS	DEPDC1	819	0.456418	0.0632808
E2F_TARGETS	HMMR	842	0.452874	0.0786046
E2F_TARGETS	EZH2	945	0.432829	0.088304
E2F_TARGETS	ATAD2	1006	0.422069	0.100173
E2F_TARGETS	TOP2A	1066	0.411433	0.111712
E2F_TARGETS	KIF18B	1194	0.393437	0.118434
E2F_TARGETS	CCNB2	1203	0.392306	0.132384
E2F_TARGETS	CKS2	1325	0.375516	0.138813
E2F_TARGETS	MELK	1342	0.373752	0.151592
E2F_TARGETS	CDK1	1385	0.366603	0.162519
E2F_TARGETS	CDC25B	1511	0.350568	0.167786
E2F_TARGETS	MKI67	1564	0.34269	0.177222
E2F_TARGETS	CDKN3	1721	0.322301	0.179555
E2F_TARGETS	BUB1B	1792	0.311753	0.186753
E2F_TARGETS	AURKB	1854	0.305372	0.194266
E2F_TARGETS	PLK4	2021	0.290207	0.194807
E2F_TARGETS	CDKN1A	2064	0.28543	0.202746
E2F_TARGETS	HMGB2	2089	0.282272	0.211669
E2F_TARGETS	RAD51AP1	2097	0.281786	0.221612
E2F_TARGETS	ASF1B	2119	0.280223	0.230643
E2F_TARGETS	PLK1	2124	0.279785	0.240696
E2F_TARGETS	PRKDC	2130	0.278557	0.250642
E2F_TARGETS	CHEK2	2222	0.271316	0.255069
E2F_TARGETS	DIAPH3	2250	0.268251	0.263293
E2F_TARGETS	LBR	2300	0.264478	0.270034
E2F_TARGETS	AURKA	2375	0.257261	0.274982
E2F_TARGETS	TIPIN	2386	0.25644	0.283809
E2F_TARGETS	CENPM	2410	0.254277	0.291763
E2F_TARGETS	MCM4	2446	0.251291	0.298873
E2F_TARGETS	LMNB1	2460	0.250678	0.307305
E2F_TARGETS	BRCA2	2513	0.247187	0.313226
E2F_TARGETS	NBN	2536	0.244884	0.320895
E2F_TARGETS	SPC24	2541	0.244529	0.329651
E2F_TARGETS	CDCA3	2555	0.243026	0.337801
E2F_TARGETS	CIT	2597	0.238867	0.344088
E2F_TARGETS	BIRC5	2627	0.236402	0.351017
E2F_TARGETS	EXOSC8	2727	0.229342	0.353411
E2F_TARGETS	UBE2T	2729	0.229114	0.361782
E2F_TARGETS	MYBL2	2744	0.227591	0.369303
E2F_TARGETS	KIF2C	2788	0.224603	0.374943
E2F_TARGETS	DSCC1	2829	0.221662	0.380658
E2F_TARGETS	WEE1	2869	0.218925	0.386333
E2F_TARGETS	PRDX4	2891	0.217312	0.393048
E2F_TARGETS	TK1	2925	0.21503	0.398946
E2F_TARGETS	RAD50	2959	0.211835	0.404727
E2F_TARGETS	PDS5B	3019	0.207872	0.408773
E2F_TARGETS	ESPL1	3095	0.202529	0.411646
E2F_TARGETS	TIMELESS	3232	0.193925	0.410476
E2F_TARGETS	NASP	3242	0.193401	0.417044
E2F_TARGETS	TFRC	3246	0.193255	0.423974
E2F_TARGETS	BRMS1L	3347	0.186912	0.424744
E2F_TARGETS	SPAG5	3359	0.186103	0.430922
E2F_TARGETS	MCM6	3394	0.183579	0.435602
E2F_TARGETS	DONSON	3542	0.175437	0.433079
E2F_TARGETS	SHMT1	3611	0.17153	0.435238
E2F_TARGETS	ASF1A	3672	0.168251	0.437766
E2F_TARGETS	GINS1	3685	0.167577	0.4432
E2F_TARGETS	EED	3801	0.162321	0.44215
E2F_TARGETS	PTTG1	3839	0.160285	0.445789
E2F_TARGETS	HMGB3	3867	0.158802	0.449984
E2F_TARGETS	RACGAP1	3919	0.156624	0.452633
E2F_TARGETS	BARD1	3936	0.156166	0.457404
E2F_TARGETS	RAD21	3957	0.154821	0.46188
E2F_TARGETS	TACC3	4062	0.15152	0.461104
E2F_TARGETS	XPO1	4127	0.148321	0.462653
E2F_TARGETS	CDKN2C	4159	0.146878	0.466165
E2F_TARGETS	EIF2S1	4190	0.145755	0.469697
E2F_TARGETS	DCK	4265	0.142222	0.470412
E2F_TARGETS	PCNA	4334	0.139068	0.471376
E2F_TARGETS	ANP32E	4446	0.13373	0.469518
E2F_TARGETS	POLE	4449	0.133626	0.474314
E2F_TARGETS	HELLS	4481	0.132439	0.477294
E2F_TARGETS	MTHFD2	4522	0.13098	0.479672
E2F_TARGETS	CDCA8	4661	0.125164	0.475849
E2F_TARGETS	MXD3	4663	0.125036	0.480389
E2F_TARGETS	DNMT1	4675	0.124766	0.484309
E2F_TARGETS	CKS1B	4740	0.122243	0.484899
E2F_TARGETS	NUP205	4839	0.119048	0.483294
E2F_TARGETS	UBE2S	4840	0.119033	0.487675
E2F_TARGETS	CDC20	4893	0.116679	0.488793
E2F_TARGETS	KPNA2	4920	0.11611	0.491478
KRAS_SIGNALING_UP	LIF	114	0.784642	0.0107478
KRAS_SIGNALING_UP	PTGS2	196	0.708989	0.0218029
KRAS_SIGNALING_UP	KLF4	225	0.682041	0.0354853
KRAS_SIGNALING_UP	GADD45G	229	0.679754	0.0506423
KRAS_SIGNALING_UP	ITGA2	263	0.653881	0.063384
KRAS_SIGNALING_UP	PRRX1	317	0.622418	0.0741947
KRAS_SIGNALING_UP	SCN1B	359	0.593235	0.0850794
KRAS_SIGNALING_UP	CSF2RA	476	0.544709	0.0902905
KRAS_SIGNALING_UP	CXCL10	563	0.514857	0.0966594
KRAS_SIGNALING_UP	SCG3	572	0.510867	0.1077
KRAS_SIGNALING_UP	G0S2	594	0.503951	0.117791
KRAS_SIGNALING_UP	IL1B	606	0.502303	0.128455
KRAS_SIGNALING_UP	MYCN	618	0.49956	0.139057
KRAS_SIGNALING_UP	ADAMDEC1	619	0.499106	0.15032
KRAS_SIGNALING_UP	MMP11	645	0.492849	0.159916
KRAS_SIGNALING_UP	CPE	661	0.488649	0.170028
KRAS_SIGNALING_UP	IRF8	663	0.488405	0.180989
KRAS_SIGNALING_UP	PRDM1	668	0.487848	0.191754
KRAS_SIGNALING_UP	CFB	674	0.486831	0.202435
KRAS_SIGNALING_UP	MPZL2	675	0.486824	0.213421
KRAS_SIGNALING_UP	TMEM158	697	0.482572	0.223029
KRAS_SIGNALING_UP	EPHB2	731	0.474318	0.231719
KRAS_SIGNALING_UP	AMMECR1	740	0.472339	0.24189
KRAS_SIGNALING_UP	MALL	776	0.463903	0.250222
KRAS_SIGNALING_UP	ANGPTL4	781	0.462938	0.260425
KRAS_SIGNALING_UP	SPARCL1	786	0.461345	0.270592
KRAS_SIGNALING_UP	BIRC3	827	0.454714	0.278412
KRAS_SIGNALING_UP	LAT2	848	0.451304	0.287376
KRAS_SIGNALING_UP	IL2RG	925	0.436943	0.292597
KRAS_SIGNALING_UP	CA2	943	0.432866	0.301328
KRAS_SIGNALING_UP	CLEC4A	958	0.43076	0.310194
KRAS_SIGNALING_UP	IGF2	964	0.429938	0.319591
KRAS_SIGNALING_UP	IKZF1	978	0.427127	0.328437
KRAS_SIGNALING_UP	ALDH1A2	994	0.424648	0.337104
KRAS_SIGNALING_UP	MMP9	1025	0.418201	0.34471
KRAS_SIGNALING_UP	CXCR4	1038	0.41608	0.353367
KRAS_SIGNALING_UP	SCG5	1181	0.395534	0.353625
KRAS_SIGNALING_UP	LY96	1210	0.391418	0.360749
KRAS_SIGNALING_UP	ACE	1288	0.381082	0.364648
KRAS_SIGNALING_UP	TNFRSF1B	1309	0.378339	0.371965
KRAS_SIGNALING_UP	KIF5C	1401	0.364786	0.374642
KRAS_SIGNALING_UP	MAP4K1	1417	0.363099	0.38192
KRAS_SIGNALING_UP	KCNN4	1458	0.357705	0.387551
KRAS_SIGNALING_UP	LCP1	1521	0.348518	0.391631
KRAS_SIGNALING_UP	IL10RA	1546	0.345755	0.397969
KRAS_SIGNALING_UP	ANO1	1573	0.341622	0.404091
KRAS_SIGNALING_UP	SPON1	1598	0.338764	0.410271
KRAS_SIGNALING_UP	TLR8	1625	0.335368	0.416252
KRAS_SIGNALING_UP	PTPRR	1730	0.320887	0.417144
KRAS_SIGNALING_UP	GLRX	1771	0.31454	0.421801
KRAS_SIGNALING_UP	CCND2	1772	0.314514	0.428899
KRAS_SIGNALING_UP	PECAM1	1826	0.307965	0.432613
KRAS_SIGNALING_UP	TRIB1	1843	0.30635	0.43855
KRAS_SIGNALING_UP	MAFB	1949	0.296584	0.438833
KRAS_SIGNALING_UP	PSMB8	2023	0.290115	0.440924
KRAS_SIGNALING_UP	LAPTM5	2216	0.271507	0.43533
KRAS_SIGNALING_UP	CAB39L	2224	0.271196	0.441023
KRAS_SIGNALING_UP	TMEM176A	2236	0.270254	0.44645
KRAS_SIGNALING_UP	NRP1	2265	0.267078	0.450768
KRAS_SIGNALING_UP	NGF	2283	0.26548	0.455721
KRAS_SIGNALING_UP	ABCB1	2340	0.260597	0.458183
KRAS_SIGNALING_UP	FGF9	2466	0.250311	0.456201
KRAS_SIGNALING_UP	PIGR	2493	0.248003	0.460211
KRAS_SIGNALING_UP	PLAU	2514	0.247176	0.464568
KRAS_SIGNALING_UP	SERPINA3	2530	0.245186	0.469186
KRAS_SIGNALING_UP	ADAM8	2673	0.233335	0.465783
KRAS_SIGNALING_UP	INHBA	2702	0.230852	0.469283
KRAS_SIGNALING_UP	TMEM176B	2756	0.226712	0.471164
KRAS_SIGNALING_UP	APOD	2866	0.219316	0.469459
KRAS_SIGNALING_UP	TSPAN13	2964	0.211469	0.46831
KRAS_SIGNALING_UP	FCER1G	2999	0.208946	0.47095
KRAS_SIGNALING_UP	PCP4	3046	0.206257	0.472796
KRAS_SIGNALING_UP	DOCK2	3074	0.204405	0.475761
KRAS_SIGNALING_UP	HKDC1	3108	0.201687	0.478298
KRAS_SIGNALING_UP	CMKLR1	3203	0.195992	0.476982
KRAS_SIGNALING_UP	FBXO4	3247	0.193244	0.478718
KRAS_SIGNALING_UP	RGS16	3257	0.192527	0.482514
KRAS_SIGNALING_UP	ADAM17	3261	0.192358	0.486671
KRAS_SIGNALING_UP	IL7R	3272	0.1919	0.490392
IL2_STAT5_SIGNALING	ECM1	50	0.911765	0.0177109
IL2_STAT5_SIGNALING	SOCS2	55	0.900133	0.0379668
IL2_STAT5_SIGNALING	ADAM19	82	0.828347	0.0552439
IL2_STAT5_SIGNALING	IL3RA	87	0.824041	0.0737669
IL2_STAT5_SIGNALING	LIF	114	0.784642	0.0900487
IL2_STAT5_SIGNALING	COCH	129	0.772138	0.106779
IL2_STAT5_SIGNALING	BATF3	147	0.748018	0.122776
IL2_STAT5_SIGNALING	TNFRSF18	224	0.683406	0.133698
IL2_STAT5_SIGNALING	TNFRSF8	248	0.665014	0.147438
IL2_STAT5_SIGNALING	NT5E	253	0.659667	0.162218
IL2_STAT5_SIGNALING	IL1R2	380	0.583433	0.167808
IL2_STAT5_SIGNALING	FGL2	427	0.56404	0.177844
IL2_STAT5_SIGNALING	ICOS	511	0.533595	0.184926
IL2_STAT5_SIGNALING	SLC2A3	514	0.531795	0.196916
IL2_STAT5_SIGNALING	CXCL10	563	0.514857	0.205709
IL2_STAT5_SIGNALING	SLC39A8	565	0.51432	0.217362
IL2_STAT5_SIGNALING	CTLA4	597	0.503734	0.22694
IL2_STAT5_SIGNALING	ITGA6	623	0.498273	0.236761
IL2_STAT5_SIGNALING	MAP3K8	647	0.492141	0.246565
IL2_STAT5_SIGNALING	CST7	656	0.489576	0.257226
IL2_STAT5_SIGNALING	IRF8	663	0.488405	0.267983
IL2_STAT5_SIGNALING	GBP4	736	0.472733	0.274351
IL2_STAT5_SIGNALING	CDC6	800	0.459517	0.280968
IL2_STAT5_SIGNALING	CD48	801	0.459496	0.291433
IL2_STAT5_SIGNALING	SYT11	847	0.451526	0.298967
IL2_STAT5_SIGNALING	TNFRSF4	873	0.446537	0.30761
IL2_STAT5_SIGNALING	ENO3	899	0.44128	0.316133
IL2_STAT5_SIGNALING	IL2RB	939	0.434073	0.323636
IL2_STAT5_SIGNALING	CA2	943	0.432866	0.333311
IL2_STAT5_SIGNALING	RHOH	1016	0.420384	0.338487
IL2_STAT5_SIGNALING	BATF	1078	0.409689	0.344091
IL2_STAT5_SIGNALING	GPR83	1105	0.405358	0.351735
IL2_STAT5_SIGNALING	ALCAM	1169	0.397137	0.356931
IL2_STAT5_SIGNALING	CD79B	1198	0.392976	0.364171
IL2_STAT5_SIGNALING	TNFRSF1B	1309	0.378339	0.366068
IL2_STAT5_SIGNALING	SERPINC1	1335	0.374414	0.373068
IL2_STAT5_SIGNALING	CD86	1435	0.36005	0.37522
IL2_STAT5_SIGNALING	EOMES	1447	0.358744	0.382718
IL2_STAT5_SIGNALING	TNFSF10	1488	0.353333	0.388322
IL2_STAT5_SIGNALING	IL10RA	1546	0.345755	0.392714
IL2_STAT5_SIGNALING	SELL	1651	0.331511	0.393911
IL2_STAT5_SIGNALING	TNFRSF21	1657	0.330218	0.401127
IL2_STAT5_SIGNALING	CCND2	1772	0.314514	0.401326
IL2_STAT5_SIGNALING	GPR65	1898	0.300885	0.400542
IL2_STAT5_SIGNALING	IL10	1900	0.300277	0.40732
IL2_STAT5_SIGNALING	P4HA1	1901	0.300185	0.414157
IL2_STAT5_SIGNALING	MUC1	1912	0.299487	0.420366
IL2_STAT5_SIGNALING	LTB	1920	0.298754	0.426743
IL2_STAT5_SIGNALING	PENK	2002	0.291731	0.428439
IL2_STAT5_SIGNALING	CCR4	2078	0.283004	0.430303
IL2_STAT5_SIGNALING	AHR	2113	0.280462	0.434613
IL2_STAT5_SIGNALING	HOPX	2118	0.280245	0.440751
IL2_STAT5_SIGNALING	CDCP1	2123	0.280065	0.446885
IL2_STAT5_SIGNALING	SCN9A	2238	0.270091	0.446073
IL2_STAT5_SIGNALING	NRP1	2265	0.267078	0.450567
IL2_STAT5_SIGNALING	TLR7	2277	0.265861	0.45595
IL2_STAT5_SIGNALING	ABCB1	2340	0.260597	0.458098
IL2_STAT5_SIGNALING	S100A1	2440	0.251609	0.45778
IL2_STAT5_SIGNALING	IL2RA	2507	0.247346	0.459382
IL2_STAT5_SIGNALING	GLIPR2	2616	0.237409	0.458191
IL2_STAT5_SIGNALING	F2RL2	2649	0.234795	0.461584
IL2_STAT5_SIGNALING	DHRS3	2660	0.234205	0.466307
IL2_STAT5_SIGNALING	P2RX4	2804	0.223251	0.462656
IL2_STAT5_SIGNALING	IL18R1	2881	0.217707	0.462972
IL2_STAT5_SIGNALING	ANXA4	2938	0.213583	0.464415
IL2_STAT5_SIGNALING	PHTF2	2980	0.210215	0.466698
IL2_STAT5_SIGNALING	IFNGR1	3053	0.206032	0.466992
IL2_STAT5_SIGNALING	FAM126B	3128	0.200728	0.467043
IL2_STAT5_SIGNALING	XBP1	3175	0.197807	0.468738
IL2_STAT5_SIGNALING	RGS16	3257	0.192527	0.468175
IL2_STAT5_SIGNALING	LRIG1	3340	0.187467	0.467435
IL2_STAT5_SIGNALING	LCLAT1	3349	0.186692	0.471198
IL2_STAT5_SIGNALING	SPRY4	3403	0.183082	0.47213
IL2_STAT5_SIGNALING	BMP2	3479	0.178905	0.471623
IL2_STAT5_SIGNALING	PTRH2	3551	0.174858	0.471268
IL2_STAT5_SIGNALING	NCS1	3582	0.173444	0.473386
IL2_STAT5_SIGNALING	SNX14	3616	0.17136	0.475273
ESTROGEN_RESPONSE_LATE	ISG20	57	0.896181	0.018416
ESTROGEN_RESPONSE_LATE	CA12	100	0.805752	0.0355387
ESTROGEN_RESPONSE_LATE	FABP5	179	0.720911	0.0483896
ESTROGEN_RESPONSE_LATE	SLC27A2	182	0.717517	0.0657993
ESTROGEN_RESPONSE_LATE	TFPI2	185	0.715342	0.0831559
ESTROGEN_RESPONSE_LATE	RAB31	207	0.700186	0.0989818
ESTROGEN_RESPONSE_LATE	KLF4	225	0.682041	0.114609
ESTROGEN_RESPONSE_LATE	PAPSS2	294	0.637401	0.12603
ESTROGEN_RESPONSE_LATE	PRLR	302	0.630952	0.141019
ESTROGEN_RESPONSE_LATE	EGR3	319	0.621112	0.155218
ESTROGEN_RESPONSE_LATE	PGR	429	0.563255	0.162323
ESTROGEN_RESPONSE_LATE	MYB	446	0.556439	0.174942
ESTROGEN_RESPONSE_LATE	FKBP5	466	0.548493	0.187184
ESTROGEN_RESPONSE_LATE	CALCR	513	0.531953	0.197372
ESTROGEN_RESPONSE_LATE	FOXC1	611	0.501516	0.203702
ESTROGEN_RESPONSE_LATE	KIF20A	658	0.48894	0.212839
ESTROGEN_RESPONSE_LATE	CPE	661	0.488649	0.224657
ESTROGEN_RESPONSE_LATE	SFN	775	0.464138	0.229096
ESTROGEN_RESPONSE_LATE	CDC6	800	0.459517	0.238858
ESTROGEN_RESPONSE_LATE	CA2	943	0.432866	0.240762
ESTROGEN_RESPONSE_LATE	CDH1	977	0.427169	0.249184
ESTROGEN_RESPONSE_LATE	SGK1	979	0.427062	0.259558
ESTROGEN_RESPONSE_LATE	TOP2A	1066	0.411433	0.264358
ESTROGEN_RESPONSE_LATE	BATF	1078	0.409689	0.273697
ESTROGEN_RESPONSE_LATE	PRKAR2B	1083	0.408362	0.28343
ESTROGEN_RESPONSE_LATE	HSPB8	1121	0.402309	0.291001
ESTROGEN_RESPONSE_LATE	HSPA4L	1132	0.401394	0.300198
ESTROGEN_RESPONSE_LATE	OLFM1	1170	0.397117	0.307641
ESTROGEN_RESPONSE_LATE	CHST8	1250	0.385738	0.312241
ESTROGEN_RESPONSE_LATE	MAPT	1275	0.382645	0.320125
ESTROGEN_RESPONSE_LATE	RPS6KA2	1367	0.369255	0.323589
ESTROGEN_RESPONSE_LATE	CCNA1	1372	0.368405	0.332347
ESTROGEN_RESPONSE_LATE	SLC1A4	1422	0.362783	0.338218
ESTROGEN_RESPONSE_LATE	PTGER3	1568	0.342229	0.337724
ESTROGEN_RESPONSE_LATE	PTPN6	1659	0.330068	0.340292
ESTROGEN_RESPONSE_LATE	CLIC3	1667	0.329246	0.34791
ESTROGEN_RESPONSE_LATE	RAPGEFL1	1702	0.324668	0.353766
ESTROGEN_RESPONSE_LATE	FOS	1791	0.311768	0.356009
ESTROGEN_RESPONSE_LATE	ASS1	1814	0.309413	0.362226
ESTROGEN_RESPONSE_LATE	CD9	1822	0.308129	0.369327
ESTROGEN_RESPONSE_LATE	MYOF	1903	0.299934	0.37177
ESTROGEN_RESPONSE_LATE	DYNLT3	1913	0.299351	0.378534
ESTROGEN_RESPONSE_LATE	ST14	1926	0.297999	0.385083
ESTROGEN_RESPONSE_LATE	DNAJC12	1996	0.292514	0.388016
ESTROGEN_RESPONSE_LATE	PLK4	2021	0.290207	0.393641
ESTROGEN_RESPONSE_LATE	OPN3	2233	0.270498	0.387363
ESTROGEN_RESPONSE_LATE	LTF	2327	0.261963	0.388084
ESTROGEN_RESPONSE_LATE	JAK2	2349	0.259337	0.393138
ESTROGEN_RESPONSE_LATE	FGFR3	2378	0.257124	0.39771
ESTROGEN_RESPONSE_LATE	STIL	2487	0.248802	0.397193
ESTROGEN_RESPONSE_LATE	SCUBE2	2495	0.247908	0.402823
ESTROGEN_RESPONSE_LATE	EMP2	2496	0.247881	0.40888
ESTROGEN_RESPONSE_LATE	SERPINA3	2530	0.245186	0.412856
ESTROGEN_RESPONSE_LATE	DHRS2	2584	0.24009	0.415485
ESTROGEN_RESPONSE_LATE	IDH2	2629	0.236156	0.418568
ESTROGEN_RESPONSE_LATE	PTGES	2632	0.235856	0.424209
ESTROGEN_RESPONSE_LATE	CXCL12	2681	0.232646	0.426961
ESTROGEN_RESPONSE_LATE	SULT2B1	2785	0.224862	0.426165
ESTROGEN_RESPONSE_LATE	TFAP2C	2856	0.219633	0.427256
ESTROGEN_RESPONSE_LATE	PDZK1	2861	0.219433	0.432373
ESTROGEN_RESPONSE_LATE	RBBP8	2907	0.216164	0.434907
ESTROGEN_RESPONSE_LATE	TSPAN13	2964	0.211469	0.436654
ESTROGEN_RESPONSE_LATE	SCNN1A	3021	0.207704	0.438308
ESTROGEN_RESPONSE_LATE	PCP4	3046	0.206257	0.441882
ESTROGEN_RESPONSE_LATE	DNAJC1	3143	0.199798	0.440901
ESTROGEN_RESPONSE_LATE	IL6ST	3162	0.198667	0.444656
ESTROGEN_RESPONSE_LATE	XBP1	3175	0.197807	0.448756
ESTROGEN_RESPONSE_LATE	GJB3	3189	0.196739	0.452769
ANGIOGENESIS	VTN	131	0.768964	0.0721461
ANGIOGENESIS	MSX1	214	0.693614	0.139411
ANGIOGENESIS	S100A4	264	0.653788	0.204525
ANGIOGENESIS	PRG2	273	0.646636	0.271376
ANGIOGENESIS	KCNJ8	363	0.591496	0.327584
ANGIOGENESIS	VCAN	553	0.517121	0.369996
ANGIOGENESIS	JAG1	954	0.431566	0.390731
ANGIOGENESIS	JAG2	1352	0.371479	0.405391
ANGIOGENESIS	TNFRSF21	1657	0.330218	0.421381
ANGIOGENESIS	CCND2	1772	0.314514	0.447234
ANGIOGENESIS	STC1	1794	0.31168	0.478418
ANGIOGENESIS	THBD	1882	0.302615	0.504666
ANGIOGENESIS	FGFR1	2110	0.280525	0.520141
ANGIOGENESIS	NRP1	2265	0.267078	0.538633
ANGIOGENESIS	VAV2	2350	0.259244	0.560546
ANGIOGENESIS	VEGFA	2745	0.227499	0.560394
ANGIOGENESIS	COL3A1	2935	0.213938	0.571236
G2M_CHECKPOINT	SAP30	161	0.734296	0.0156682
G2M_CHECKPOINT	NDC80	470	0.547362	0.0158676
G2M_CHECKPOINT	EGF	525	0.527686	0.0308952
G2M_CHECKPOINT	CENPE	691	0.483684	0.037616
G2M_CHECKPOINT	CDC6	800	0.459517	0.0469785
G2M_CHECKPOINT	HMMR	842	0.452874	0.0602018
G2M_CHECKPOINT	EZH2	945	0.432829	0.0690039
G2M_CHECKPOINT	CENPA	1002	0.422997	0.0802737
G2M_CHECKPOINT	TOP2A	1066	0.411433	0.0907145
G2M_CHECKPOINT	BCL3	1151	0.398915	0.0994381
G2M_CHECKPOINT	CCNB2	1203	0.392306	0.109947
G2M_CHECKPOINT	SQLE	1231	0.38911	0.121811
G2M_CHECKPOINT	BUB1	1254	0.385321	0.133849
G2M_CHECKPOINT	NEK2	1315	0.377608	0.143298
G2M_CHECKPOINT	CKS2	1325	0.375516	0.155789
G2M_CHECKPOINT	CDK1	1385	0.366603	0.164918
G2M_CHECKPOINT	CDC45	1400	0.36492	0.176735
G2M_CHECKPOINT	E2F2	1466	0.356306	0.18514
G2M_CHECKPOINT	CDC25B	1511	0.350568	0.194627
G2M_CHECKPOINT	MKI67	1564	0.34269	0.203352
G2M_CHECKPOINT	NUSAP1	1583	0.340615	0.214082
G2M_CHECKPOINT	TTK	1654	0.330916	0.221299
G2M_CHECKPOINT	PTTG3P	1676	0.32765	0.231395
G2M_CHECKPOINT	CDKN3	1721	0.322301	0.2399
G2M_CHECKPOINT	CENPF	1733	0.320752	0.250368
G2M_CHECKPOINT	MEIS2	1851	0.305765	0.253841
G2M_CHECKPOINT	AURKB	1854	0.305372	0.264324
G2M_CHECKPOINT	PLK4	2021	0.290207	0.264265
G2M_CHECKPOINT	KIF11	2027	0.289635	0.274018
G2M_CHECKPOINT	PLK1	2124	0.279785	0.277871
G2M_CHECKPOINT	CCNA2	2134	0.278372	0.286989
G2M_CHECKPOINT	UBE2C	2270	0.266537	0.288001
G2M_CHECKPOINT	LBR	2300	0.264478	0.295414
G2M_CHECKPOINT	TROAP	2335	0.261313	0.302413
G2M_CHECKPOINT	AURKA	2375	0.257261	0.308965
G2M_CHECKPOINT	LMNB1	2460	0.250678	0.312541
G2M_CHECKPOINT	STIL	2487	0.248802	0.319593
G2M_CHECKPOINT	BRCA2	2513	0.247187	0.326651
G2M_CHECKPOINT	DBF4	2527	0.245447	0.334381
G2M_CHECKPOINT	RASAL2	2565	0.24224	0.340533
G2M_CHECKPOINT	CDC27	2601	0.238584	0.346682
G2M_CHECKPOINT	BIRC5	2627	0.236402	0.353364
G2M_CHECKPOINT	MYBL2	2744	0.227591	0.354184
G2M_CHECKPOINT	RAD54L	2753	0.227065	0.361581
G2M_CHECKPOINT	KIF2C	2788	0.224603	0.367305
G2M_CHECKPOINT	PBK	2956	0.21209	0.364472
G2M_CHECKPOINT	PDS5B	3019	0.207872	0.367904
G2M_CHECKPOINT	TPX2	3050	0.206105	0.37323
G2M_CHECKPOINT	FBXO5	3078	0.204055	0.378667
G2M_CHECKPOINT	ESPL1	3095	0.202529	0.384723
G2M_CHECKPOINT	NASP	3242	0.193401	0.382524
G2M_CHECKPOINT	MCM6	3394	0.183579	0.379678
G2M_CHECKPOINT	RBL1	3622	0.170907	0.37175
G2M_CHECKPOINT	ARID4A	3760	0.164474	0.369096
G2M_CHECKPOINT	CDC7	3829	0.160745	0.370525
G2M_CHECKPOINT	PTTG1	3839	0.160285	0.375542
G2M_CHECKPOINT	KIF15	3864	0.158977	0.379597
G2M_CHECKPOINT	HMGB3	3867	0.158802	0.38499
G2M_CHECKPOINT	CUL1	3895	0.157661	0.388816
G2M_CHECKPOINT	KIF20B	3903	0.157431	0.393856
G2M_CHECKPOINT	RACGAP1	3919	0.156624	0.398379
G2M_CHECKPOINT	BARD1	3936	0.156166	0.402825
G2M_CHECKPOINT	RAD21	3957	0.154821	0.40698
G2M_CHECKPOINT	TACC3	4062	0.15152	0.405891
G2M_CHECKPOINT	SLC12A2	4090	0.150175	0.409457
G2M_CHECKPOINT	XPO1	4127	0.148321	0.41241
G2M_CHECKPOINT	CDKN2C	4159	0.146878	0.415617
G2M_CHECKPOINT	SS18	4328	0.139264	0.410194
G2M_CHECKPOINT	LIG3	4343	0.138536	0.41415
G2M_CHECKPOINT	POLE	4449	0.133626	0.412378
G2M_CHECKPOINT	PRC1	4570	0.129316	0.409541
G2M_CHECKPOINT	PAFAH1B1	4580	0.128569	0.413456
G2M_CHECKPOINT	KIF5B	4601	0.127704	0.41667
G2M_CHECKPOINT	RPS6KA5	4625	0.126567	0.41966
G2M_CHECKPOINT	DTYMK	4633	0.126064	0.423611
G2M_CHECKPOINT	KIF23	4705	0.12349	0.423563
G2M_CHECKPOINT	CKS1B	4740	0.122243	0.425732
G2M_CHECKPOINT	HIF1A	4817	0.119735	0.425249
G2M_CHECKPOINT	UBE2S	4840	0.119033	0.428039
G2M_CHECKPOINT	CDC20	4893	0.116679	0.428916
G2M_CHECKPOINT	TGFB1	4894	0.116661	0.432967
G2M_CHECKPOINT	CHAF1A	4910	0.116358	0.436092
G2M_CHECKPOINT	KPNA2	4920	0.11611	0.439575
COAGULATION	ITGB3	151	0.744494	0.0197027
COAGULATION	TFPI2	185	0.715342	0.0454482
COAGULATION	ITGA2	263	0.653881	0.0661343
COAGULATION	SERPINE1	279	0.644495	0.0902255
COAGULATION	C8G	280	0.643491	0.11519
COAGULATION	HTRA1	376	0.584834	0.132103
COAGULATION	F12	390	0.58018	0.153821
COAGULATION	MMP1	483	0.540936	0.169213
COAGULATION	MMP11	645	0.492849	0.178545
COAGULATION	CFB	674	0.486831	0.19573
COAGULATION	C1S	719	0.477298	0.211571
COAGULATION	C1R	855	0.450685	0.220849
COAGULATION	THBS1	957	0.430822	0.231422
COAGULATION	HPN	965	0.429826	0.247672
COAGULATION	MMP9	1025	0.418201	0.260309
COAGULATION	ANXA1	1043	0.415237	0.275384
COAGULATION	LEFTY2	1182	0.395429	0.282336
COAGULATION	MMP2	1316	0.37731	0.288888
COAGULATION	SERPINC1	1335	0.374414	0.302319
COAGULATION	PROS1	1375	0.367443	0.314203
COAGULATION	DPP4	1383	0.366658	0.328002
COAGULATION	FN1	1539	0.346656	0.332027
COAGULATION	APOC2	1742	0.319579	0.332145
COAGULATION	DUSP14	1796	0.311282	0.340999
COAGULATION	CD9	1822	0.308129	0.351433
COAGULATION	PECAM1	1826	0.307965	0.363198
COAGULATION	THBD	1882	0.302615	0.371594
COAGULATION	PROC	1910	0.299616	0.381576
COAGULATION	C2	2024	0.290007	0.385957
COAGULATION	P2RY1	2052	0.286666	0.395437
COAGULATION	CRIP2	2129	0.278758	0.401631
COAGULATION	S100A1	2440	0.251609	0.392546
COAGULATION	ADAM9	2449	0.251198	0.401805
COAGULATION	PLEK	2467	0.250126	0.410475
COAGULATION	PLAU	2514	0.247176	0.417268
COAGULATION	SH2B2	2542	0.244437	0.425109
COAGULATION	C1QA	2561	0.242659	0.433429
COAGULATION	FBN1	2568	0.24208	0.442456
COAGULATION	KLKB1	2645	0.235158	0.446958
COAGULATION	F2RL2	2649	0.234795	0.455885
HYPOXIA	SDC2	21	1.05147	0.0267191
HYPOXIA	GPC4	23	1.0366	0.0542636
HYPOXIA	ISG20	57	0.896181	0.0761143
HYPOXIA	PYGM	71	0.858881	0.0981932
HYPOXIA	CA12	100	0.805752	0.117941
HYPOXIA	PCK1	155	0.740926	0.134375
HYPOXIA	SAP30	161	0.734296	0.153624
HYPOXIA	IL6	245	0.66721	0.166324
HYPOXIA	S100A4	264	0.653788	0.182635
HYPOXIA	SERPINE1	279	0.644495	0.198944
HYPOXIA	HS3ST1	369	0.587894	0.209165
HYPOXIA	SLC2A3	514	0.531795	0.214532
HYPOXIA	STC2	616	0.500163	0.221684
HYPOXIA	TPD52	665	0.488175	0.231753
HYPOXIA	PDK1	707	0.481126	0.242062
HYPOXIA	GPC3	738	0.47246	0.252812
HYPOXIA	TGFBI	751	0.4697	0.264587
HYPOXIA	PLAC8	780	0.463471	0.27522
HYPOXIA	ANGPTL4	781	0.462938	0.287548
HYPOXIA	ENO3	899	0.44128	0.292155
HYPOXIA	CXCR4	1038	0.41608	0.294807
HYPOXIA	EFNA3	1061	0.412417	0.304447
HYPOXIA	COL5A1	1100	0.406218	0.312944
HYPOXIA	PFKP	1113	0.404047	0.322971
HYPOXIA	PGM1	1130	0.401446	0.332685
HYPOXIA	PRKCA	1267	0.383553	0.334593
HYPOXIA	ADORA2B	1313	0.37772	0.341904
HYPOXIA	ATF3	1487	0.353589	0.340755
HYPOXIA	PAM	1528	0.347374	0.347563
HYPOXIA	STBD1	1597	0.338799	0.352433
HYPOXIA	P4HA2	1629	0.334961	0.35946
HYPOXIA	GLRX	1771	0.31454	0.359225
HYPOXIA	FOS	1791	0.311768	0.366367
HYPOXIA	STC1	1794	0.31168	0.374545
HYPOXIA	P4HA1	1901	0.300185	0.376066
HYPOXIA	KDELR3	1939	0.297255	0.381722
HYPOXIA	CSRP2	2020	0.290239	0.384566
HYPOXIA	CDKN1A	2064	0.28543	0.389541
HYPOXIA	CHST2	2120	0.28018	0.393644
HYPOXIA	EDN2	2161	0.275692	0.398543
HYPOXIA	WSB1	2343	0.260428	0.394424
HYPOXIA	HMOX1	2490	0.248284	0.392119
HYPOXIA	PGM2	2630	0.236023	0.389916
HYPOXIA	PKP1	2661	0.234139	0.394319
HYPOXIA	FBP1	2720	0.229737	0.396895
HYPOXIA	VEGFA	2745	0.227499	0.401488
HYPOXIA	SULT2B1	2785	0.224862	0.405094
HYPOXIA	GPC1	2832	0.221346	0.408179
HYPOXIA	VLDLR	2864	0.219356	0.412128
HYPOXIA	MT1E	3015	0.208078	0.408508
HYPOXIA	PGAM2	3051	0.206097	0.411859
HYPOXIA	PHKG1	3169	0.19828	0.409994
HYPOXIA	PDGFB	3375	0.18473	0.402394
HYPOXIA	TPST2	3385	0.184214	0.40675
HYPOXIA	KIF5A	3411	0.182863	0.410093
HYPOXIA	TGFB3	3422	0.182271	0.414336
HYPOXIA	PGF	3503	0.177636	0.414181
HYPOXIA	DDIT3	3531	0.17626	0.417226
HYPOXIA	EGFR	3631	0.17023	0.415713
HYPOXIA	RBPJ	3639	0.16986	0.419809
HYPOXIA	CHST3	3641	0.169824	0.424271
APOPTOSIS	ISG20	57	0.896181	0.0286232
APOPTOSIS	IRF1	121	0.778911	0.0526806
APOPTOSIS	FEZ1	148	0.746032	0.0778158
APOPTOSIS	IL6	245	0.66721	0.0958608
APOPTOSIS	EGR3	319	0.621112	0.113657
APOPTOSIS	PRF1	552	0.517318	0.118043
APOPTOSIS	IL1B	606	0.502303	0.132803
APOPTOSIS	TNF	664	0.488353	0.146819
APOPTOSIS	CD2	764	0.466188	0.157482
APOPTOSIS	FASLG	805	0.458711	0.171473
APOPTOSIS	BIRC3	827	0.454714	0.186479
APOPTOSIS	GCH1	902	0.440276	0.197737
APOPTOSIS	F2R	919	0.438187	0.212456
APOPTOSIS	ANXA1	1043	0.415237	0.21983
APOPTOSIS	TOP2A	1066	0.411433	0.233225
APOPTOSIS	TGFB2	1091	0.407301	0.24635
APOPTOSIS	CASP1	1122	0.402138	0.258925
APOPTOSIS	TAP1	1174	0.396729	0.270025
APOPTOSIS	CD38	1283	0.381651	0.277111
APOPTOSIS	IL18	1303	0.378989	0.289527
APOPTOSIS	MMP2	1316	0.37731	0.302309
APOPTOSIS	CD69	1348	0.372015	0.313744
APOPTOSIS	CCNA1	1372	0.368405	0.325537
APOPTOSIS	TNFRSF12A	1436	0.359853	0.334585
APOPTOSIS	ATF3	1487	0.353589	0.344201
APOPTOSIS	TNFSF10	1488	0.353333	0.356856
APOPTOSIS	CDC25B	1511	0.350568	0.368071
APOPTOSIS	LGALS3	1621	0.336056	0.373463
APOPTOSIS	CCND2	1772	0.314514	0.375584
APOPTOSIS	LEF1	1776	0.314276	0.386658
APOPTOSIS	CDKN1A	2064	0.28543	0.379386
APOPTOSIS	DPYD	2076	0.283226	0.38886
APOPTOSIS	HMGB2	2089	0.282272	0.398238
APOPTOSIS	FAS	2242	0.269557	0.398627
APOPTOSIS	DNAJC3	2328	0.261959	0.402828
APOPTOSIS	NEFH	2356	0.258694	0.410448
APOPTOSIS	PDGFRB	2459	0.250725	0.41321
APOPTOSIS	HMOX1	2490	0.248284	0.420274
APOPTOSIS	BCL2L11	2685	0.232407	0.416772
APOPTOSIS	WEE1	2869	0.218925	0.413458
APOPTOSIS	CASP8	3020	0.207751	0.411756
APOPTOSIS	IFNGR1	3053	0.206032	0.417184
APOPTOSIS	BAX	3070	0.205209	0.423559
APOPTOSIS	KRT18	3212	0.195387	0.421962
APOPTOSIS	GUCY2D	3360	0.185888	0.419659
APOPTOSIS	GNA15	3472	0.179275	0.419314
APOPTOSIS	BMP2	3479	0.178905	0.425356
APOPTOSIS	DDIT3	3531	0.17626	0.42856
APICAL_JUNCTION	NEXN	46	0.91765	0.0235604
APICAL_JUNCTION	RHOF	137	0.761273	0.0399393
APICAL_JUNCTION	LAYN	143	0.753013	0.061273
APICAL_JUNCTION	AMIGO2	258	0.657801	0.0732125
APICAL_JUNCTION	ITGA2	263	0.653881	0.0917585
APICAL_JUNCTION	ADAMTS5	386	0.581203	0.101008
APICAL_JUNCTION	CDH6	394	0.578685	0.11721
APICAL_JUNCTION	TNFRSF11B	494	0.53885	0.126647
APICAL_JUNCTION	LAMB3	510	0.533853	0.141072
APICAL_JUNCTION	VCAN	553	0.517121	0.153367
APICAL_JUNCTION	CD209	637	0.495214	0.162528
APICAL_JUNCTION	MPZL2	675	0.486824	0.174258
APICAL_JUNCTION	TGFBI	751	0.4697	0.183174
APICAL_JUNCTION	PIK3R3	778	0.463821	0.194915
APICAL_JUNCTION	CDH1	977	0.427169	0.195095
APICAL_JUNCTION	MMP9	1025	0.418201	0.204242
APICAL_JUNCTION	SYK	1070	0.410617	0.213354
APICAL_JUNCTION	ACTA1	1096	0.406888	0.22352
APICAL_JUNCTION	SLIT2	1187	0.394692	0.229364
APICAL_JUNCTION	PTPRC	1220	0.389999	0.238617
APICAL_JUNCTION	MMP2	1316	0.37731	0.243657
APICAL_JUNCTION	ADAM23	1333	0.374659	0.253446
APICAL_JUNCTION	CD86	1435	0.36005	0.257623
APICAL_JUNCTION	RAC2	1481	0.354229	0.265054
APICAL_JUNCTION	ITGA10	1536	0.346804	0.271721
APICAL_JUNCTION	NEGR1	1628	0.335055	0.275791
APICAL_JUNCTION	CLDN4	1660	0.330068	0.283382
APICAL_JUNCTION	NRXN2	1732	0.320788	0.288264
APICAL_JUNCTION	COL17A1	1752	0.317379	0.296224
APICAL_JUNCTION	PECAM1	1826	0.307965	0.300614
APICAL_JUNCTION	NLGN3	1844	0.306178	0.308374
APICAL_JUNCTION	CDH11	1914	0.299233	0.312759
APICAL_JUNCTION	VCAM1	1962	0.295306	0.318374
APICAL_JUNCTION	ACTC1	2042	0.288116	0.321828
APICAL_JUNCTION	PPP2R2C	2055	0.286168	0.329318
APICAL_JUNCTION	NFASC	2172	0.274896	0.330132
APICAL_JUNCTION	KCNH2	2200	0.272887	0.336325
APICAL_JUNCTION	LAMA3	2230	0.270874	0.342337
APICAL_JUNCTION	THY1	2247	0.26905	0.349092
APICAL_JUNCTION	CLDN18	2278	0.26584	0.354898
APICAL_JUNCTION	MADCAM1	2341	0.260497	0.358597
APICAL_JUNCTION	VAV2	2350	0.259244	0.365558
APICAL_JUNCTION	CLDN15	2370	0.257608	0.3718
APICAL_JUNCTION	ADRA1B	2404	0.254591	0.377101
APICAL_JUNCTION	ICAM5	2407	0.254349	0.384288
APICAL_JUNCTION	CDH4	2433	0.252342	0.390012
APICAL_JUNCTION	ADAM9	2449	0.251198	0.396314
APICAL_JUNCTION	FBN1	2568	0.24208	0.396063
APICAL_JUNCTION	CLDN5	2653	0.234631	0.397675
APICAL_JUNCTION	LIMA1	2698	0.231248	0.401632
APICAL_JUNCTION	CLDN14	2703	0.230837	0.408021
APICAL_JUNCTION	CDK8	2780	0.225088	0.409847
APICAL_JUNCTION	ATP1A3	2796	0.224127	0.415372
NOTCH_SIGNALING	SAP30	161	0.734296	0.115374
NOTCH_SIGNALING	DLL1	411	0.573154	0.197967
NOTCH_SIGNALING	LFNG	716	0.478264	0.261064
NOTCH_SIGNALING	FZD7	770	0.465486	0.337171
NOTCH_SIGNALING	JAG1	954	0.431566	0.399632
NOTCH_SIGNALING	PRKCA	1267	0.383553	0.446107
NOTCH_SIGNALING	DTX1	2436	0.251854	0.418348
NOTCH_SIGNALING	HES1	2665	0.233789	0.444388
NOTCH_SIGNALING	NOTCH3	2711	0.230408	0.480924
NOTCH_SIGNALING	FZD5	2809	0.222723	0.513005
NOTCH_SIGNALING	WNT5A	3132	0.200462	0.527678
NOTCH_SIGNALING	HEYL	3458	0.179787	0.538647
NOTCH_SIGNALING	CUL1	3895	0.157661	0.539129
NOTCH_SIGNALING	FZD1	4290	0.14079	0.539279
NOTCH_SIGNALING	MAML2	4615	0.127096	0.54133
ESTROGEN_RESPONSE_EARLY	ADCY1	34	0.974917	0.0226495
ESTROGEN_RESPONSE_EARLY	SLC1A1	48	0.916313	0.0450953
ESTROGEN_RESPONSE_EARLY	REEP1	80	0.835807	0.0643998
ESTROGEN_RESPONSE_EARLY	CA12	100	0.805752	0.0836751
ESTROGEN_RESPONSE_EARLY	SLC27A2	182	0.717517	0.0969258
ESTROGEN_RESPONSE_EARLY	AQP3	190	0.713106	0.114584
ESTROGEN_RESPONSE_EARLY	RAB31	207	0.700186	0.131365
ESTROGEN_RESPONSE_EARLY	KLF4	225	0.682041	0.147625
ESTROGEN_RESPONSE_EARLY	PAPSS2	294	0.637401	0.159638
ESTROGEN_RESPONSE_EARLY	BCL11B	304	0.630131	0.17507
ESTROGEN_RESPONSE_EARLY	EGR3	319	0.621112	0.189967
ESTROGEN_RESPONSE_EARLY	PGR	429	0.563255	0.197596
ESTROGEN_RESPONSE_EARLY	MYB	446	0.556439	0.210731
ESTROGEN_RESPONSE_EARLY	FKBP5	466	0.548493	0.223481
ESTROGEN_RESPONSE_EARLY	CALCR	513	0.531953	0.234163
ESTROGEN_RESPONSE_EARLY	RASGRP1	530	0.525685	0.246519
ESTROGEN_RESPONSE_EARLY	FOXC1	611	0.501516	0.254352
ESTROGEN_RESPONSE_EARLY	STC2	616	0.500163	0.266793
ESTROGEN_RESPONSE_EARLY	SEC14L2	680	0.485673	0.275263
ESTROGEN_RESPONSE_EARLY	SFN	775	0.464138	0.281294
ESTROGEN_RESPONSE_EARLY	CBFA2T3	829	0.45452	0.289584
ESTROGEN_RESPONSE_EARLY	GFRA1	906	0.439917	0.2961
ESTROGEN_RESPONSE_EARLY	INHBB	1069	0.411115	0.296632
ESTROGEN_RESPONSE_EARLY	HSPB8	1121	0.402309	0.303721
ESTROGEN_RESPONSE_EARLY	OLFM1	1170	0.397117	0.310861
ESTROGEN_RESPONSE_EARLY	MAPT	1275	0.382645	0.314214
ESTROGEN_RESPONSE_EARLY	GJA1	1320	0.376425	0.321073
ESTROGEN_RESPONSE_EARLY	RPS6KA2	1367	0.369255	0.327629
ESTROGEN_RESPONSE_EARLY	SLC1A4	1422	0.362783	0.333532
ESTROGEN_RESPONSE_EARLY	CLIC3	1667	0.329246	0.32698
ESTROGEN_RESPONSE_EARLY	TUBB2B	1680	0.327093	0.334543
ESTROGEN_RESPONSE_EARLY	RAPGEFL1	1702	0.324668	0.341494
ESTROGEN_RESPONSE_EARLY	FOS	1791	0.311768	0.344027
ESTROGEN_RESPONSE_EARLY	MYOF	1903	0.299934	0.344854
ESTROGEN_RESPONSE_EARLY	MUC1	1912	0.299487	0.351961
ESTROGEN_RESPONSE_EARLY	DYNLT3	1913	0.299351	0.359554
ESTROGEN_RESPONSE_EARLY	ELOVL2	2103	0.281256	0.355143
ESTROGEN_RESPONSE_EARLY	GREB1	2136	0.278278	0.360247
ESTROGEN_RESPONSE_EARLY	MYBL1	2151	0.276513	0.366405
ESTROGEN_RESPONSE_EARLY	AR	2209	0.27234	0.369831
ESTROGEN_RESPONSE_EARLY	OPN3	2233	0.270498	0.375286
ESTROGEN_RESPONSE_EARLY	JAK2	2349	0.259337	0.37484
ESTROGEN_RESPONSE_EARLY	DHRS2	2584	0.24009	0.366637
ESTROGEN_RESPONSE_EARLY	PTGES	2632	0.235856	0.369748
ESTROGEN_RESPONSE_EARLY	DHRS3	2660	0.234205	0.374039
ESTROGEN_RESPONSE_EARLY	HES1	2665	0.233789	0.379725
ESTROGEN_RESPONSE_EARLY	CXCL12	2681	0.232646	0.384709
ESTROGEN_RESPONSE_EARLY	SULT2B1	2785	0.224862	0.384121
ESTROGEN_RESPONSE_EARLY	TFAP2C	2856	0.219633	0.385416
ESTROGEN_RESPONSE_EARLY	PDZK1	2861	0.219433	0.390737
ESTROGEN_RESPONSE_EARLY	RBBP8	2907	0.216164	0.393471
ESTROGEN_RESPONSE_EARLY	SCNN1A	3021	0.207704	0.391837
ESTROGEN_RESPONSE_EARLY	IL6ST	3162	0.198667	0.388325
ESTROGEN_RESPONSE_EARLY	XBP1	3175	0.197807	0.392609
ESTROGEN_RESPONSE_EARLY	KRT18	3212	0.195387	0.395366
ESTROGEN_RESPONSE_EARLY	P2RY2	3280	0.191319	0.396126
ESTROGEN_RESPONSE_EARLY	SYT12	3324	0.188354	0.398277
ESTROGEN_RESPONSE_EARLY	LRIG1	3340	0.187467	0.402115

## Sheet: Fig6A heatmap genes
Symbol	Clusters
MDFI	E1
XKR5	E1
PAG1	E1
PLCL2	E1
RUNX1T1	E1
GJA1	E1
WWTR1	E1
PI15	E1
TBX18	E1
TSPYL5	E1
OSR2	E1
TRIB1	E1
KLHL38	E1
DENND3	E1
ADCK5	E1
PTP4A3	E1
ST3GAL1	E1
SCXB	E1
BAI1	E1
JPH1	E1
ASAP1	E1
CHD7	E1
MDGA1	E1
SGK1	E1
TMEM158	E1
FGFR1	E1
FOXC1	E1
NCALD	E1
PMP2	E1
PLN	E1
TDH	E1
PENK	E1
MAL2	E1
CAMK1	E1
MGLL	E1
ATP6V0D2	E1
FOXL2	E1
FNDC1	E1
COL14A1	E1
RFTN1	E1
SMOC2	E1
ZFPM2	E1
COL12A1	E1
FILIP1L	E1
CA8	E1
GPR63	E1
THBS2	E1
GEM	E1
SDC2	E1
ARC	E1
PPP1R14C	E1
ULBP1	E1
CEBPD	E1
EGR3	E1
ALCAM	E1
PVRL3	E1
CNR1	E1
PROS1	E1
DLL1	E1
FKBP5	E1
RBM24	E1
ESR1	E1
SYNJ2	E1
CD109	E1
SLC17A5	E1
NT5E	E1
TPD52	E1
KCNK9	E1
UNC5D	E1
CCDC36	E1
MMP16	E1
BAG2	E1
LYN	E1
SLCO5A1	E1
ZNF704	E1
KIAA0196	E1
PRKDC	E1
RAB2A	E1
KHDRBS3	E1
SNTB1	E1
FRMD4B	E1
DNAJC13	E1
RRM2B	E1
IMPA1	E1
KIAA0146	E1
ARFGEF1	E1
TGS1	E1
TMEM68	E1
UBE2V2	E1
ATAD2	E1
CCNE2	E1
RAD54B	E1
MTBP	E1
MTDH	E1
TTC35	E1
RNF19A	E1
TAF2	E1
E2F5	E1
C8orf37	E1
NIPAL2	E1
ARHGAP18	E1
C6orf150	E1
LRRCC1	E1
C2	E1
C4A	E1
CFB	E1
HLA-DRB5	E1
HLA-DQB1	E1
HLA-DQA1	E1
HLA-DRB1	E1
ADAMDEC1	E1
HCLS1	E1
HLA-DPA1	E1
HLA-DOA	E1
HLA-DRA	E1
HLA-DQB2	E1
HLA-DMA	E1
LST1	E1
LTB	E1
HLA-H	E1
HCG26	E1
HCP5	E1
HLA-C	E1
HLA-F	E1
HLA-B	E1
PSMB8	E1
ETV7	E1
PSMB9	E1
FAM26F	E1
BTN3A3	E1
TAP1	E1
IDO1	E1
UBD	E1
COL22A1	E1
EOMES	E1
CPNE5	E1
PHYHIP	E1
MYB	E1
ZC3H12D	E1
BAALC	E1
RNF182	E1
PXDNL	E1
SLC6A1	E1
TNIK	E1
AGPAT4	E1
RPS6KA2	E1
MOXD1	E1
PACSIN1	E1
TTBK1	E1
ANK1	E1
GFRA2	E1
SLC38A3	E1
RSPO3	E1
XIRP1	E1
CA13	E1
GPR126	E1
ADAM28	E1
RUNX2	E1
PRDM1	E1
TNFSF10	E1
TOX	E1
LTA	E1
CD96	E1
TIGIT	E1
CCR5	E1
CXCR6	E1
TNF	E1
HLA-DOB	E1
IPCEF1	E1
THEMIS	E1
TRAT1	E1
EYA4	E1
TNFRSF11B	E1
TM7SF4	E1
DPYS	E1
RIMS2	E1
FGF12	E1
NOV	E1
ME1	E1
SPAG1	E1
TCEB1	E1
COPS5	E1
FAM82B	E1
MRPL13	E1
TMEM70	E1
HRSP12	E1
FAM49B	E1
MRPS28	E1
FABP5	E1
SQLE	E1
LY96	E1
TNFRSF21	E1
ENPP4	E1
CA2	E1
PKIA	E1
ANGPT2	E1
ADAMTS9	E1
SCHIP1	E1
C6orf138	E1
CDKN1A	E1
TNFRSF10C	E1
TNFRSF10D	E1
BLK	E1
NKAPL	E1
CIDEC	E2
PLA1A	E2
SLC6A6	E2
SRGAP3	E2
DUSP7	E2
RAB43	E2
ANO10	E2
CCBP2	E2
LNP1	E2
ADPRH	E2
PIGZ	E2
KIF25	E2
TMEM45A	E2
C6orf48	E2
RPL29	E2
RPL14	E2
RPL32	E2
RPL10A	E2
RPS10	E2
RPS18	E2
LYRM4	E2
RPSA	E2
RPL15	E2
RPL24	E2
RPL35A	E2
NMNAT3	E2
RPS12	E2
LOC100287227	E2
CAND2	E2
PCOLCE2	E2
TMEM44	E2
TRAIP	E2
LY6G5C	E2
TPRXL	E2
LMCD1	E2
LOH3CR2A	E2
C6orf145	E2
LOC100270746	E2
SEMA3B	E2
LAMB2	E2
SCAP	E2
EEFSEC	E2
PTPN23	E2
DVL3	E2
IP6K1	E2
USP19	E2
APOM	E2
IFT122	E2
ABHD14B	E2
DALRD3	E2
ZBTB47	E2
H1FX	E2
TNK2	E2
C3orf54	E2
PPM1M	E2
RNF122	E2
LOC100125556	E2
XYLB	E2
KLF15	E2
HEMK1	E2
LOC100009676	E2
ALDH1L1	E2
FAM86D	E2
MSC	E2
GATA4	E2
TFAP2A	E2
LOC729375	E2
LOC100128640	E2
SLC25A26	E2
PLXNB1	E2
SLC41A3	E2
BRPF1	E2
C3orf39	E2
PLCD1	E2
GPR62	E2
WDR6	E2
GTF2H4	E2
MCM2	E2
HYAL1	E2
HYAL2	E2
C6orf134	E2
HSPA1L	E2
ZBTB12	E2
GPR156	E2
TMPPE	E2
LRRC33	E2
BAP1	E2
C3orf32	E2
ERVFRDE1	E2
GSTA3	E2
SERPINB9	E2
AMOTL2	E2
SOBP	E2
HDAC11	E2
RPUSD3	E2
PRKCD	E2
SLC25A38	E2
MTMR14	E2
NICN1	E2
C6orf226	E2
IL17RE	E2
ALG1L	E2
LOC340357	E2
FAM86B1	E2
FAM86B2	E2
EPHX2	E2
FDFT1	E2
RAB11FIP1	E2
SYBU	E2
FBXO40	E2
LRRN1	E2
BOC	E2
CCDC80	E2
STAR	E2
MME	E2
EGFL8	E2
HSD17B8	E2
JARID2	E2
LOC222699	E2
ZSCAN12P1	E2
MATN2	E2
NEDD9	E2
HAS2	E2
ACOX2	E2
APOBEC2	E2
MST1	E2
ROBO1	E2
TTC21A	E2
C3orf15	E2
LOC100302640	E2
LOC344595	E2
SLC25A27	E2
ZNF662	E2
FZD6	E2
PLAG1	E2
LRRC34	E2
STXBP5L	E2
ZNF311	E2
ZNF717	E2
C3orf23	E2
KLHL24	E2
ACVR2B	E2
LZTFL1	E2
RPL32P3	E2
ZNF167	E2
ZSCAN23	E2
ZNF501	E2
PGBD1	E2
ZNF323	E2
ZSCAN12	E2
SYCP2L	E2
FLJ10661	E2
DNAH1	E2
MUC20	E2
LOC285830	E2
DCDC2	E2
EIF4E3	E2
C3orf58	E2
C8orf46	E2
BCHE	E2
CRISPLD1	E2
RNF144B	E2
GTPBP8	E2
EIF2A	E2
FXR1	E2
IQCB1	E2
ZNF197	E2
IL1RAP	E2
ZNF860	E2
COL6A6	E2
SCN11A	E2
C6orf41	E2
COL11A2	E2
ARPM1	E2
CD83	E2
GPR27	E2
HIST1H2AC	E2
SNAI2	E2
HS3ST5	E2
PIM1	E2
MGC2889	E2
IL17RD	E2
MRAP2	E2
DPYSL2	E2
FLJ22536	E2
CLCN2	E2
FBXO16	E2
RARB	E2
SYNPR	E2
EPPK1	E2
PTPLB	E2
RAD54L2	E2
SFMBT1	E2
ZNF619	E2
PIK3R4	E2
SENP2	E2
HHATL	E2
SYN2	E2
ASB14	E2
PPARG	E2
ENPP1	E2
ZDHHC2	E2
C6orf155	E2
C6orf168	E2
PERP	E2
SCAND3	E2
SLC7A2	E2
C6orf142	E2
DLC1	E2
GPD1L	E2
SMARCC1	E2
CTNNB1	E2
EHHADH	E2
TIPARP	E2
ENPP2	E2
MTUS1	E2
SATB1	E2
PPP1R3B	E2
ZNF391	E2
MARCKS	E2
ZNF204P	E2
ZBTB20	E2
NHSL1	E2
C6orf176	E2
LOC441177	E2
KCNQ5	E2
SLC16A10	E2
CTHRC1	E2
ECE2	E2
CELSR3	E2
CRELD1	E2
SLC6A11	E2
ATP6V1G2	E2
?	E2
PCBP4	E2
UNC5CL	E2
LIPH	E2
TMEM40	E2
FAM135B	E2
VNN2	E2
CYP39A1	E2
SAMD12	E2
PACRG	E2
CHL1	E2
PRICKLE2	E2
NEK11	E2
NKIRAS1	E2
HFE	E2
PLSCR4	E2
TSEN2	E2
EIF4A2	E2
TMEM41A	E2
MKRN2	E2
EIF1B	E2
RAF1	E2
C3orf71	E2
LEKR1	E2
C3orf14	E2
MLF1	E2
C3orf67	E2
CNTN3	E2
EFCAB1	E2
C3orf31	E2
HRASLS	E2
KIF9	E2
KIF6	E2
C6orf218	E2
ROPN1B	E2
ROPN1	E2
KAAG1	E2
GXYLT2	E2
HCG4	E2
ZDHHC19	E2
ABHD6	E2
CCDC13	E2

## Sheet: Fig6E heatmap genes
Symbol	Clusters
LIMS2	M2
IL11RA	M2
FN3K	M2
IL17RC	M2
ZNF532	M2
GULP1	M2
RAB34	M2
MTUS1	M2
IL12RB2	M2
RADIL	M2
BAP1	M2
PRKCD	M2
FDFT1	M2
PDE4B	M2
LMCD1	M2
PRUNE2	M2
CAND2	M2
KIF1A	M2
NYNRIN	M2
APBB1	M2
MPZ	M2
FAM69B	M2
MAMSTR	M2
CDCA7L	M2
AFF3	M2
ZBTB38	M2
MBNL2	M2
EXTL1	M2
SLC41A3	M2
PPP1R3B	M2
C11orf41	M2
PBX1	M2
CPS1	M2
PDCD4	M2
C6orf218	M2
VIM	M2
HYAL1	M2
JUP	M2
MAL	M2
C8orf46	M2
D4S234E	M2
MFAP2	M2
SORBS2	M2
FAM65B	M2
LDHD	M2
KLF9	M2
HLF	M2
C20orf26	M2
PRRT4	M2
PHYHD1	M2
KCNK2	M2
ERBB3	M2
MSC	M2
PSD3	M2
SH3D19	M2
POSTN	M2
COL11A1	M2
MATN2	M2
COL11A2	M2
LOC441869	M2
CUTA	M2
FAM126A	M2
EEFSEC	M2
GATA4	M2
TECR	M2
RPL18A	M2
LDHC	M2
GSTA3	M2
DDX21	M2
FSTL3	M2
HSD17B1	M2
ORAI1	M2
ZNF358	M2
GSTP1	M2
CDC42EP1	M2
MAP3K11	M2
PPP1R3C	M2
NFIA	M2
CCDC68	M2
LOC100188947	M2
PLXNB1	M2
NTNG1	M2
DENND1A	M2
SEMA3B	M2
EDNRB	M2
RBPMS	M2
GPRIN3	M2
DLC1	M2
BAMBI	M2
C8orf79	M2
PTRF	M2
PCMTD2	M2
SOBP	M2
SORBS1	M2
ABCC5	M2
C3orf17	M2
UACA	M2
TFAP2A	M2
LOC154822	M2
BCAS4	M2
SLC7A4	M2
IGHMBP2	M2
GPD1L	M2
LPIN1	M2
SNRPA	M2
LTBP1	M2
RASIP1	M2
MTMR14	M2
MYOM1	M2
DVL3	M2
ARHGAP21	M2
IFT122	M2
CTSD	M2
LRRC33	M2
CTSF	M2
PLEKHG4	M2
SILV	M2
MPPED2	M2
RORC	M2
SERPINB9	M2
PLA1A	M2
QARS	M2
BMI1	M2
FAM169A	M2
RNF43	M2
SLC44A3	M2
RBP7	M2
MAP3K5	M2
SLC7A5	M2
C4orf19	M2
HOOK1	M2
NET1	M2
ABLIM1	M2
BTBD3	M2
TRIM2	M2
PTP4A1	M2
LRRK2	M2
PPARG	M2
CCDC80	M2
GLIS1	M2
ABCA8	M2
HMCN1	M2
YJEFN3	M2
DDAH2	M2
ABCA1	M2
C3orf39	M2
RFNG	M2
FAP	M2
MEGF10	M2
SPP1	M2
FXYD3	M2
KCNS3	M2
TMEM8B	M2
TGFB1I1	M2
LPAR6	M2
FBXO40	M2
GPX3	M2
NCKAP5	M2
COL1A2	M2
ARRDC3	M2
BOC	M2
PALMD	M2
ROBO1	M2
HPGD	M2
PODXL2	M2
ID4	M2
KCNQ5	M2
GPR37	M2
SEMA6A	M2
PDK2	M2
SHC4	M2
ENPP2	M2
SLC7A2	M2
STXBP5	M2
PDCD6IP	M2
AHCYL2	M2
KIF6	M2
SLC6A15	M2
ZHX1	M2
SATB1	M2
HNMT	M2
SLC25A38	M2
CTF1	M2
EFS	M2
FCGRT	M2
FBXO17	M2
EMILIN1	M2
ACOT11	M2
EFEMP2	M2
ACSF2	M2
RAB11FIP1	M2
TLR4	M2
CPXM2	M2
FXYD5	M2
PYCARD	M2
ROPN1B	M2
C6orf176	M2
SNCA	M2
SPINT1	M2
FGD4	M2
EMCN	M2
KIAA1217	M2
ATAD3C	M2
TJP2	M2
PCDH20	M2
SPRY1	M2
PRICKLE2	M2
CCL28	M2
SERPING1	M2
TNFSF12	M2
CAT	M2
PDK4	M2
AEBP1	M2
COX6A2	M2
LGI4	M2
RPSAP58	M2
TUBB4	M2
RAPGEF3	M2
FGFR1	M1
PRKCA	M1
CHSY3	M1
PCDHGC3	M1
ATP6V0A4	M1
CEND1	M1
EGFLAM	M1
TRIM47	M1
CADM1	M1
CYGB	M1
GPR124	M1
LINGO1	M1
CPLX1	M1
TSC22D1	M1
C2	M1
PAM	M1
MAN1C1	M1
PLEKHB1	M1
GJA1	M1
TMEM200B	M1
FERMT3	M1
NDUFA4L2	M1
SH3PXD2B	M1
RUFY3	M1
TTYH3	M1
STK32A	M1
RHOQ	M1
ZC3H7A	M1
KIT	M1
SULT1A1	M1
LOC653653	M1
SGSM2	M1
PRKCDBP	M1
MGAT4A	M1
CRB1	M1
PPM1K	M1
IFI16	M1
TMTC1	M1
TMEM176B	M1
COBL	M1
EYA2	M1
UCHL1	M1
PGCP	M1
TNFRSF19	M1
ACSL1	M1
GPRC5A	M1
WARS	M1
F5	M1
COL14A1	M1
CDH2	M1
PTPRR	M1
F7	M1
IFI44L	M1
RASGRF1	M1
FMNL1	M1
NECAB2	M1
DOCK10	M1
IRX1	M1
GNG4	M1
PLCB4	M1
ADAM12	M1
SLC16A6	M1
KDR	M1
MUC7	M1
PCDHGA12	M1
PTGER4	M1
HSD17B14	M1
SLC6A13	M1
SLC45A2	M1
AZI1	M1
NCALD	M1
CHGA	M1
SRD5A3	M1
SOX1	M1
SEPHS2	M1
WFDC1	M1
SERPINF1	M1
HMGA1	M1
PRAME	M1
MGC16025	M1
CD163L1	M1
PSG4	M1
CTSW	M1
MXRA8	M1
TMEM176A	M1
GBP4	M1
CYP4V2	M1
EVPL	M1
ISG20	M1
PARP4	M1
PLXNC1	M1
MET	M1
EPS8	M1
THBS2	M1
NT5DC3	M1
PTP4A3	M1
FABP3	M1
BAIAP2L2	M1
AMN	M1
ELFN1	M1
POR	M1
AHNAK2	M1
TUBA8	M1
GPR56	M1
BCAT1	M1
ADAM9	M1
BIRC6	M1
ANKRD30B	M1
C10orf28	M1
SGK1	M1
GBP3	M1
MTMR10	M1
CCR2	M1
MYEOV	M1
SUSD5	M1
CPEB4	M1
KDELR3	M1
KIAA0802	M1
GPM6A	M1
SPIRE1	M1
SMOC2	M1
SGCD	M1
CLCN3	M1
ARMC9	M1
PFKP	M1
FSCN1	M1
SLC22A18	M1
GREB1	M1
P4HA1	M1
BAG2	M1
CHAC1	M1
SFRS7	M1
SLC1A4	M1
DLL4	M1
LAG3	M1
APOL3	M1
CASP1	M1
XAF1	M1
GBP1	M1
PSMB8	M1
TAP1	M1
BTN3A3	M1
NLRC5	M1
HSD17B12	M1
HTRA1	M1
EFR3A	M1
TAGLN2	M1
FOS	M1
ACTR3	M1
NOP58	M1
HTATIP2	M1
NT5E	M1
FLRT2	M1
SPON2	M1
FEZ1	M1
ANO9	M1
TP53INP1	M1
RRM2B	M1
CTSS	M1
HCP5	M1
